# Supplementary material for: MicroRNA miR-301a is a novel cardiac regulator of Cofilin-2
Source: PLoS One. 2017 Sep 8;12(9):e0183901. doi: 10.1371/journal.pone.0183901 (PMC5590826; doi:10.1371/journal.pone.0183901)
Supplement: S1 Table — (XLSX) [file pone.0183901.s004.xlsx]

## Sheet: Summary
S1 Table. Comparative microRNA microarray analysis data between Calsarcin-1 knockout and wild-type mice.
									Wild-type		Calsarcin-1 knockout
TargetID	Fold change	Array_Sdev_Diff	Bead_Sdev_Diff	CHROMOSOME	PROBE_COORDINATES	PROBE_CHR_ORIENTATION	PROBESEQ	TARGETMATURESEQS	Avg_signal	p-val	Avg_signal	p-val
mmu-miR-582-3p	1.49527	0.216905	7.51833	13	110114986	+	GTTGAACAACTGAACCCAA	CCTGTTGAACAACTGAACCCAA	207.075	3.17774e-26	309.633	3.678e-38
mmu-miR-582-5p	-1.25598	0.349196	6.17248	13	110114947	+	TACAGTTGTTCAACCAGTTACT	TACAGTTGTTCAACCAGTTACT	911.925	3.678e-38	726.067	3.678e-38
solexa-4327-106	-1.41754	0.449752	7.44971	0	0	+	CAAATCTTATTTGAGCACCTG	CAAATCTTATTTGAGCACCTGT	94.975	0.0229547	67	0.810974
mmu-miR-883b-5p	1.43427	1.42395	11.3783	X	64043133	-	ACTGAGAATGGGTAGCAGTC	TACTGAGAATGGGTAGCAGTCA	105.675	0.0104456	151.567	0.00346622
mmu-miR-449b	6.9853	0.592587	35.4548	13	113827636	+	GCAGTGTTGTTAGCTGGC	AGGCAGTGTTGTTAGCTGGC	78.25	0.431533	546.6	3.678e-38
mmu-let-7b*	-1.21333	0.16746	5.01662	15	85537808	+	ACAACCTACTGCCTTC	CTATACAACCTACTGCCTTCCC	215.65	4.54142e-36	177.733	1.62289e-06
mmu-miR-544	1.06175	1.31874	1.5909	12	110967580	+	TTCTGCATTTTTAGCAAGC	ATTCTGCATTTTTAGCAAGCTC	61	0.878821	64.7667	0.840507
mmu-miR-883a-3p	1.95495	0.659941	24.79	X	64033965	-	CAACAGCTCTCAGTAT	TAACTGCAACAGCTCTCAGTAT	88.425	0.182927	172.867	0.00167313
mmu-miR-881*	1.14334	0.140804	3.85524	X	64055183	-	CAGAGAGATAACAGTCACATCT	CAGAGAGATAACAGTCACATCT	139.3	1.36146e-07	159.267	0.00157482
solexa-5593-81	3.8283	1.12095	31.0402	0	0	+	GAAGGCAAAGGGACGT	GCTGGGAAGGCAAAGGGACGT	182.1	6.38932e-16	697.133	3.678e-38
mmu-miR-19a*	1.53475	0.870277	15.2404	14	115443233	+	TAGTTTTGCATAGTTGCACTAC	TAGTTTTGCATAGTTGCACTAC	100.95	0.0288293	154.933	0.00434954
mmu-miR-689	1.45039	0.244488	7.49267	1,16	1.69271e+16	-,+	TCCCCGCTCGGCGGGGT	CGTCCCCGCTCGGCGGGGTCC	114.475	0.000861379	166.033	4.65867e-08
mmu-miR-678	1.72315	1.15586	17.8558	10	75670100	-	TCTCGGTGCAAGGACTG	GTCTCGGTGCAAGGACTGGAGG	106.375	0.00991322	183.3	6.09205e-05
mmu-miR-380-3p	17.3782	1.0162	48.6981	12	110950051	+	TATGTAGTATGGTCCACATCTT	TATGTAGTATGGTCCACATCTT	86.85	0.205845	1509.3	3.678e-38
mmu-miR-296-3p	7.17888	2.97454	48.5023	2	174092581	-	TGGGTGGAGGCTCTCC	GAGGGTTGGGTGGAGGCTCTCC	165.1	4.3179e-12	1185.23	3.678e-38
mmu-let-7i*	2.20329	0.406411	19.0646	10	122422720	-	GCGCAAGCTACTGCCTTGCT	CTGCGCAAGCTACTGCCTTGCT	279.975	3.678e-38	616.867	3.678e-38
mmu-miR-669k	1.18751	1.07292	4.69776	2	10396990	+	ATATACACGCATGCAA	TATGCATATACACGCATGCAA	71.55	0.632125	84.9667	0.56983
mmu-miR-201	-1.28944	0.304513	6.85894	X	65241332	-	TACTCAGTAAGGCATTGTTCT	TACTCAGTAAGGCATTGTTCTT	2002.5	3.678e-38	1553	3.678e-38
mmu-miR-450a-3p	2.87623	0.5784	36.1204	X	50401503	-	GGATGCTTTGCATTCAT	ATTGGGGATGCTTTGCATTCAT	76.35	0.47859	219.6	1.15584e-05
mmu-miR-453	2.15744	1.56418	25.2434	12	110973878	+	GCCTCATAGTGAGCTTGC	AGGTTGCCTCATAGTGAGCTTGCA	199.125	2.39324e-21	429.6	3.678e-38
mmu-miR-219	1.28229	0.487338	8.36737	17,2	3416201829701230	-,-	TGATTGTCCAAACGCAAT	TGATTGTCCAAACGCAATTCT	199.825	1.58379e-22	256.233	2.19703e-12
mmu-miR-142-5p	-1.0233	0.0127321	0.563509	11	87570368	+	CATAAAGTAGAAAGCACTAC	CATAAAGTAGAAAGCACTACT	441.35	3.678e-38	431.3	3.678e-38
mmu-miR-547	1.82133	2.05436	17.9081	X	65241579	-	CTTGGTACATCTTTGAGTGA	CTTGGTACATCTTTGAGTGAG	2598.72	3.678e-38	4733.13	3.678e-38
mmu-miR-18b	1.5724	0.247341	13.466	X	50095581	-	TAAGGTGCATCTAGTGCTGT	TAAGGTGCATCTAGTGCTGTTAG	129.95	2.72503e-07	204.333	1.26768e-06
mmu-miR-206	3.81095	1.18184	32.6421	1	20669135	+	TGGAATGTAAGGAAGTGTGT	TGGAATGTAAGGAAGTGTGTGG	735.975	3.678e-38	2804.77	3.678e-38
mmu-miR-298	10.4116	3.85977	54.7365	2	174093077	-	CAGAGGAGGGCTGTTCT	GGCAGAGGAGGGCTGTTCTTCCC	127.425	1.74626e-05	1326.7	3.678e-38
mmu-miR-138*	4.03473	0.8965	44.0887	9	122592053	+	GGCTACTTCACAACACCAG	CGGCTACTTCACAACACCAGGG	124.775	2.19961e-05	503.433	3.678e-38
mmu-miR-144	3.36481	0.657	33.9224	11	77886548	+	TACAGTATAGATGATGTACT	TACAGTATAGATGATGTACT	136.6	3.11713e-07	459.633	3.678e-38
mmu-miR-667	1.19418	0.285173	6.27557	12	110958270	+	TGACACCTGCCACCCAG	TGACACCTGCCACCCAGCCCAAG	415.125	3.678e-38	495.733	3.678e-38
mmu-miR-144:9.1	1.14437	0.159612	4.01129	0	0	+	TACAGTATAGATGATGTACTAG	TACAGTATAGATGATGTACTAG	465.175	3.678e-38	532.333	3.678e-38
mmu-miR-217	-1.21734	0.506239	5.67578	11	28663760	+	ACTGCATCAGGAACTGACT	TACTGCATCAGGAACTGACTGGA	146	1.83374e-09	119.933	0.0555368
mmu-miR-871	-1.03823	0.0300172	0.862046	X	64063670	-	TATTCAGATTAGTGCCAGTCAT	TATTCAGATTAGTGCCAGTCATG	237.375	3.678e-38	228.633	1.05465e-08
mmu-miR-200a	-2.51595	0.752674	21.5597	4	155429042	-	ACACTGTCTGGTAACGATGT	TAACACTGTCTGGTAACGATGT	237.925	4.48052e-32	94.5667	0.166062
mmu-miR-184	3.14281	1.24571	30.679	9	89697123	-	TGGACGGAGAACTGATAAG	TGGACGGAGAACTGATAAGGGT	1001.52	3.678e-38	3147.6	3.678e-38
solexa-5306-86	4.05018	1.92647	35.7524	0	0	+	ACCCGTCCCGTTCGTC	ACCCGTCCCGTTCGTCCCCGGA	198.6	6.87098e-19	804.367	3.678e-38
mmu-miR-682	1.72271	0.495003	16.4373	13	75782566	+	CTGCAGTCACAGTGAAGTC	CTGCAGTCACAGTGAAGTCTG	1342.92	3.678e-38	2313.47	3.678e-38
mmu-miR-153	-4.09766	1.23363	30.7244	12	118489332	+	TTGCATAGTCACAAAAGTGA	TTGCATAGTCACAAAAGTGATC	1766.5	3.678e-38	431.1	3.678e-38
solexa-130-3526	1.19894	0.150547	5.67394	0	0	+	CAAGAAGTAGTTTAATTAGA	CAAGAAGTAGTTTAATTAGA	116.075	0.00032448	139.167	0.017161
mmu-miR-377	-1.35465	0.769785	8.14923	12	110978762	+	ATCACACAAAGGCAACTTT	ATCACACAAAGGCAACTTTTGT	100.425	0.0241639	74.1333	0.724842
mmu-miR-296-5p	2.84244	0.563067	27.2377	2	174092615	-	AGGGCCCCCCCTCAATCC	AGGGCCCCCCCTCAATCCTGT	389.325	3.678e-38	1106.63	3.678e-38
mmu-miR-34c*	-1.06395	0.0530102	1.43634	9	50911171	-	ACTAACCACACAGCCAGG	AATCACTAACCACACAGCCAGG	966.175	3.678e-38	908.1	3.678e-38
mmu-miR-135b	1.08819	0.0937762	2.87411	1	134094679	+	TATGGCTTTTCATTCCTAT	TATGGCTTTTCATTCCTATGTGA	313.825	3.678e-38	341.5	4.16771e-24
mmu-miR-675-5p	4.24148	0.54856	23.1773	7	149763039	-	TGCGGAAAGGGCCCACA	TGGTGCGGAAAGGGCCCACAGT	198.775	2.48806e-21	843.1	3.678e-38
mmu-miR-297c*,mmu-miR-297a*,mmu-miR-297b-3p	4.43089	1.14406	41.6962	2,2,2,2	1.04307e+31	+,+,+,+	TATACATACACACATACCC	TATACATACACACATACCCATA,TATACATACACACATACCCATA,TATACATACACACATACCCATA	563.875	3.678e-38	2498.47	3.678e-38
mmu-miR-343	-1.31215	0.154326	5.32515	7	19972036	+	CCTTCATGTGCCCAGA	TCTCCCTTCATGTGCCCAGA	185.1	9.59947e-18	141.067	0.000120648
mmu-miR-878-3p	2.28848	1.09773	27.8895	X	64054715	-	CATGACACCACACTGGG	GCATGACACCACACTGGGTAGA	151.775	3.69589e-09	347.333	1.31757e-25
mmu-miR-497	1.21219	0.558242	6.67613	11	70048231	+	AGCAGCACACTGTGGTTT	CAGCAGCACACTGTGGTTTGTA	3296.32	3.678e-38	3995.77	3.678e-38
mmu-miR-363	1.03289	0.467725	0.926011	X	50094896	-	ATTGCACGGTATCCATCT	AATTGCACGGTATCCATCTGTA	77.775	0.441574	80.3333	0.623299
solexa-201-2163	1.46291	0.253496	9.98335	0	0	+	ACCTTGGCTCTAGACTGCT	ACCTTGGCTCTAGACTGCTTACT	1205.47	3.678e-38	1763.5	3.678e-38
mmu-miR-15a*	2.65036	0.340749	16.1953	14	62250897	-	AGGCCATACTGTGCTGC	CAGGCCATACTGTGCTGCCTCA	206.5	2.8277e-27	547.3	3.678e-38
mmu-miR-487b	1.37565	0.630803	10.0904	12	110965591	+	TCGTACAGGGTCATCCAC	AATCGTACAGGGTCATCCACTT	122.875	6.48672e-05	169.033	2.43245e-05
mmu-miR-676*	-1.75821	0.349677	14.2152	X	97576452	+	ACTCTACAACCTTAGGACT	ACTCTACAACCTTAGGACTTGC	298.075	3.678e-38	169.533	0.000558172
mmu-miR-224	1.56386	0.346121	9.71771	X	69506445	-	AAGTCACTAGTGGTTCCGT	TAAGTCACTAGTGGTTCCGTT	1665.78	3.678e-38	2605.03	3.678e-38
mmu-miR-467c	-1.16311	0.0679727	3.2717	2	10395567	+	TAAGTGCGTGCATGTATATGTG	TAAGTGCGTGCATGTATATGTG	780.525	3.678e-38	671.067	3.678e-38
mmu-miR-672	1.36787	0.211299	7.51988	X	101311590	-	GAGGTTGGTGTACTGTGTG	TGAGGTTGGTGTACTGTGTGTGA	579.15	3.678e-38	792.2	3.678e-38
mmu-miR-466l	1.61082	1.1922	17.2534	2	10437782	+	TATAAATACATGCACACATATT	TATAAATACATGCACACATATT	144.75	5.42567e-08	233.167	6.21587e-10
mmu-miR-101a*	-1.89117	0.3564	15.465	4	101019620	-	TCAGTTATCACAGTGCTGATG	TCAGTTATCACAGTGCTGATGC	590.55	3.678e-38	312.267	5.01582e-20
mmu-miR-130b	1.33227	0.170064	6.87858	16	17124186	-	CAGTGCAATGATGAAAGG	CAGTGCAATGATGAAAGGGCAT	691.425	3.678e-38	921.167	3.678e-38
mmu-miR-501-5p	2.29667	0.579735	25.9345	X	6818455	-	ATCCTTTGTCCCTGGGT	AATCCTTTGTCCCTGGGTGAAA	281.175	3.678e-38	645.767	3.678e-38
mmu-miR-592	1.33699	0.419108	8.07902	6	27886734	-	TGTGTCAATATGCGATGA	ATTGTGTCAATATGCGATGATGT	856.475	3.678e-38	1145.1	3.678e-38
mmu-miR-199b*	-1.03105	0.111889	1.0502	2	32174004	+	CCCAGTGTTTAGACTACCTGT	CCCAGTGTTTAGACTACCTGTTC	7043.18	3.678e-38	6831.1	3.678e-38
mmu-miR-299	1.14355	0.172041	4.71856	12	110948885	+	GGACGGTAAACCGCTT	TATGTGGGACGGTAAACCGCTT	200.4	9.55546e-26	229.167	7.42033e-09
mmu-miR-199a-5p	1.24202	0.986664	7.70437	1,9	1.64148e+16	+,-	CCCAGTGTTCAGACTACCT	CCCAGTGTTCAGACTACCTGTTC	7867.32	3.678e-38	9771.4	3.678e-38
mmu-miR-130b*	2.31604	0.657593	24.3779	16	17124224	-	CTCTTTCCCTGTTGCACTA	ACTCTTTCCCTGTTGCACTACT	900.575	3.678e-38	2085.77	3.678e-38
solexa-564-789	1.82704	0.540294	15.0675	0	0	+	AGGTTTTCTGGGTCTCTG	AGAGGTTTTCTGGGTCTCTGTTTC	219.025	1.19596e-29	400.167	3.678e-38
mmu-miR-127*	-1.03768	0.024194	0.766939	12	110831063	+	AGCTCAGAGGGCTCTGA	CTGAAGCTCAGAGGGCTCTGAT	180.175	1.41619e-20	173.633	1.50469e-09
mmu-miR-24-1*	-1.02714	0.034241	0.782888	13	63402520	+	CTACTGAGCTGATATCAGT	GTGCCTACTGAGCTGATATCAGT	1981.7	3.678e-38	1929.33	3.678e-38
mmu-miR-1196	2.12858	0.879807	19.8436	14	62371156	-	AAATCTACCTGCCTCTGC	AAATCTACCTGCCTCTGCCT	117.825	0.00123623	250.8	1.22916e-17
mmu-miR-758	1.9236	1.55552	18.6311	12	110951067	+	TTGTGACCTGGTCCACTA	TTTGTGACCTGGTCCACTA	111.25	0.00333211	214	6.53416e-08
mmu-miR-380-5p	1.04983	1.4995	1.24343	12	110950015	+	TGGTTGACCATAGAACATG	ATGGTTGACCATAGAACATGCG	62.55	0.851109	65.6667	0.831181
mmu-miR-466j	1.75574	0.889625	21.1517	10	60423549	+	GCATGTGCATGTGTGTAA	TGTGTGCATGTGCATGTGTGTAA	113.95	0.00184026	200.067	4.87053e-06
mmu-miR-218-2*	1.57514	0.966859	15.7096	11	35430383	+	TTCTGTCAAGCACCGC	CATGGTTCTGTCAAGCACCGCG	146.675	6.09193e-08	231.033	1.02778e-09
mmu-miR-134	1.78143	0.494026	13.78	12	110972354	+	TGTGACTGGTTGACCAGA	TGTGACTGGTTGACCAGAGGGG	831.675	3.678e-38	1481.57	3.678e-38
mmu-miR-199a-3p:9.1	1.0793	0.266482	2.7207	0	0	+	TACAGTAGTCTGCACATTGG	TACAGTAGTCTGCACATTGGTT	12380.3	3.678e-38	13362.1	3.678e-38
mmu-miR-293	1.88665	1.50609	20.468	7	3220390	+	TGCCGCAGAGTTTGTAG	AGTGCCGCAGAGTTTGTAGTGT	442.3	3.678e-38	834.467	3.678e-38
mmu-miR-19b	1.22103	0.283092	6.13948	14,X	1.15444e+16	+,-	TGCAAATCCATGCAAAAC	TGTGCAAATCCATGCAAAACTGA	1038	3.678e-38	1267.43	3.678e-38
mmu-miR-362-3p	-5.31004	4.8599	35.8741	X	6819132	-	CACACCTGTTCAAGGATTC	AACACACCTGTTCAAGGATTCA	1264.67	3.678e-38	238.167	5.6477e-15
mmu-miR-683	2.40754	0.854495	24.1487	13	50640034	-	CTGCTGTAAGCTGTGTCC	CCTGCTGTAAGCTGTGTCCTC	455.25	3.678e-38	1096.03	3.678e-38
mmu-miR-742	-1.17923	0.602831	4.52075	X	64033573	-	GAAAGCCACCATGCTGG	GAAAGCCACCATGCTGGGTAAA	115.8	0.00131845	98.2	0.240814
mmu-miR-1186	2.36461	0.604457	24.0423	8	32213495	-	GCTGGAATTAAAGGCATG	GAGTGCTGGAATTAAAGGCATG	423.1	3.678e-38	1000.47	3.678e-38
mmu-miR-31*	-4.59484	4.20642	37.1878	4	88556504	-	TATGCCAACATATTGCCA	TGCTATGCCAACATATTGCCATC	1529.78	3.678e-38	332.933	7.90179e-32
mmu-miR-770-5p	-1.25651	0.209216	6.5068	12	110801919	+	CACGTGTCTGGGCCAC	AGCACCACGTGTCTGGGCCACG	2579.53	3.678e-38	2052.93	3.678e-38
solexa-5067-90	1.54313	0.240885	11.1482	0	0	+	GAAGTTCTGTTATACACTCAGG	GAAGTTCTGTTATACACTCAGG	272.325	3.678e-38	420.233	3.678e-38
solexa-2564-185	-1.05824	0.0523368	1.62299	0	0	+	ACCTGGCATACAATGTAGATT	ACCTGGCATACAATGTAGATTTCTGT	863.7	3.678e-38	816.167	3.678e-38
mmu-miR-760:9.1	5.43363	0.811245	44.3133	0	0	+	GAAATTCGGCTCTGGGTCT	GAAATTCGGCTCTGGGTCTGTGGGGAG	437.375	3.678e-38	2376.53	3.678e-38
mmu-miR-505	-3.81007	0.923745	25.394	X	57647613	-	GTCAACACTTGCTGGTTT	CGTCAACACTTGCTGGTTTTCT	267.975	3.678e-38	70.3333	0.77679
mmu-miR-92b	1.9561	0.749275	17.5137	3	89031070	-	CACTCGTCCCGGCCTC	TATTGCACTCGTCCCGGCCTCC	558.475	3.678e-38	1092.43	3.678e-38
mmu-miR-214*	-1.42359	0.442845	9.74923	1	164153527	+	GCCTGTCTACACTTGCTGT	TGCCTGTCTACACTTGCTGTGC	2119.88	3.678e-38	1489.1	3.678e-38
mmu-miR-146b*	2.42955	0.662656	25.3912	19	46417317	+	GCCCTAGGGACTCAGTTC	GCCCTAGGGACTCAGTTCTGGT	140.575	6.02664e-07	341.533	3.80084e-26
mmu-miR-34b-3p	-1.05332	0.0746236	1.53313	9	50911701	-	CACTAACTCCACTGCCATC	AATCACTAACTCCACTGCCATC	2478.4	3.678e-38	2352.93	3.678e-38
mmu-miR-214	1.48757	2.64431	15.7661	1	164153568	+	ACAGCAGGCACAGACAGG	ACAGCAGGCACAGACAGGCAGT	14577.8	3.678e-38	21685.4	3.678e-38
mmu-miR-465c-5p	1.97305	2.2122	22.0814	X,X	6407920164085760	-,-	TAGAATGGCGCTGATC	TATTTAGAATGGCGCTGATCTG	622.725	3.678e-38	1228.67	3.678e-38
mmu-miR-330*	1.91262	0.493063	15.5947	7	19766873	+	AAAGCACAGGGCCTGCA	GCAAAGCACAGGGCCTGCAGAGA	549.525	3.678e-38	1051.03	3.678e-38
mmu-miR-196b	3.02436	1.75973	33.2426	6	52180150	-	TAGGTAGTTTCCTGTTGTTG	TAGGTAGTTTCCTGTTGTTGGG	1235.6	3.678e-38	3736.9	3.678e-38
mmu-miR-221	-1.04575	0.204712	1.54106	X	18723456	-	CTACATTGTCTGCTGGGT	AGCTACATTGTCTGCTGGGTTTC	5945.1	3.678e-38	5685	3.678e-38
mmu-miR-491	1.38315	0.247845	7.55646	4	87767960	+	AGTGGGGAACCCTTCCAT	AGTGGGGAACCCTTCCATGAGG	1122.17	3.678e-38	1552.13	3.678e-38
mmu-miR-511	1.65341	0.846219	14.749	2	14182639	+	GCCTTTTGCTCTGCAC	ATGCCTTTTGCTCTGCACTCA	424.375	3.678e-38	701.667	3.678e-38
mmu-miR-141	1.64234	0.640244	19.0822	6	124667957	-	TAACACTGTCTGGTAAAGATG	TAACACTGTCTGGTAAAGATGG	136.675	3.38027e-06	224.467	5.96165e-08
mmu-miR-7a*	2.00786	1.09328	23.46	13	58494183	-	ACAAATCACAGTCTGCCATA	CAACAAATCACAGTCTGCCATA	6615.95	3.678e-38	13283.9	3.678e-38
mmu-miR-18a*	1.34325	0.210014	7.80576	14	115443129	+	CTGCCCTAAGTGCTCCTTC	ACTGCCCTAAGTGCTCCTTCTG	544.6	3.678e-38	731.533	3.678e-38
mmu-miR-30c-2*	2.3634	0.49777	26.9097	1	23298592	+	AGAAGGCTGTTTACTC	CTGGGAGAAGGCTGTTTACTCT	1056.72	3.678e-38	2497.47	3.678e-38
mmu-miR-147	3.46062	0.375902	23.1782	2	122466585	+	TGTGCGGAAATGCTTC	GTGTGCGGAAATGCTTCTGCTA	394.525	3.678e-38	1365.3	3.678e-38
mmu-miR-709	-1.19886	0.70803	6.74311	8	86610065	+	GGAGGCAGAGGCAGGAG	GGAGGCAGAGGCAGGAGGA	12072.2	3.678e-38	10069.7	3.678e-38
mmu-miR-142-3p	-5.4045	1.35572	34.7427	11	87570404	+	TGTAGTGTTTCCTACTTTATG	TGTAGTGTTTCCTACTTTATGGA	4179.3	3.678e-38	773.3	3.678e-38
mmu-miR-598	-1.10737	0.18522	2.92839	14	64346072	+	TCATCGTCGTCATCGTTA	TACGTCATCGTCGTCATCGTTA	1264.65	3.678e-38	1142.03	3.678e-38
mmu-miR-707	2.16913	1.8555	21.9205	7	52105074	+	AGTCATGCCGCTTGCCT	CAGTCATGCCGCTTGCCTACG	236.9	2.77506e-36	513.867	3.678e-38
mmu-miR-1188	-1.0273	0.462502	0.748285	12	110850050	+	TGTGAGGTTGGGCCAG	TGGTGTGAGGTTGGGCCAGGA	82.8	0.304506	80.6	0.605045
mmu-miR-331-5p	-3.17732	0.571413	21.0536	10	93426584	-	TAGGTATGGTCCCAGGG	CTAGGTATGGTCCCAGGGATCC	400.025	3.678e-38	125.9	0.00188688
mmu-miR-146b	-1.08046	0.09307	2.23597	19	46417279	+	GAGAACTGAATTCCATAGGC	TGAGAACTGAATTCCATAGGCT	2841.55	3.678e-38	2629.93	3.678e-38
solexa-1201-400	2.18349	0.523029	22.0196	0	0	+	AGAGGCGCCTGGGAAC	GGTCAAGAGGCGCCTGGGAAC	560.8	3.678e-38	1224.5	3.678e-38
mmu-miR-106a:9.1	1.27772	1.35317	7.46974	0	0	+	AAGTGCTGACAGTGCAGG	CAAAGTGCTAACAGTGCAGGTA	119.275	0.00035953	152.4	0.000667221
mmu-miR-384-5p	-1.19018	0.198989	5.78571	X	102539694	-	TAAACAATTCCTAGGCAATGT	TGTAAACAATTCCTAGGCAATGT	217.525	3.99356e-30	182.767	9.32847e-05
mmu-miR-302a	1.33279	0.788369	9.65838	3	127248456	+	GCTTCCATGTTTTGGTGA	TAAGTGCTTCCATGTTTTGGTGA	123.025	7.89971e-05	163.967	0.000940429
mmu-miR-1	-1.6028	1.22354	14.0565	18,2	1.07855e+16	-,+	TGGAATGTAAAGAAGTATGT	TGGAATGTAAAGAAGTATGTAT	11039.8	3.678e-38	6887.8	3.678e-38
mmu-miR-193	1.81098	1.51927	20.209	11	79525510	+	CTGGCCTACAAAGTCCCA	AACTGGCCTACAAAGTCCCAGT	3581.15	3.678e-38	6485.4	3.678e-38
mmu-miR-467a*,mmu-miR-467d*,mmu-miR-467a*,mmu-miR-467d*	-1.50531	1.18573	11.5106	2,2,2,2	1.0398e+31	+,+,+,+	ATATACATACACACACCTACAC	ATATACATACACACACCTACAC,ATATACATACACACACCTACAC,ATATACATACACACACCTACAC,ATATACATACACACACCTACAC	2472.57	3.678e-38	1642.57	3.678e-38
mmu-miR-704	1.0706	0.345711	1.9041	6	47753610	-	GACATGTGCTCTGCTCCT	AGACATGTGCTCTGCTCCTAG	81.45	0.36309	87.2	0.507721
mmu-miR-684	2.3774	0.381211	23.6314	2,4	8046889011061300	-,+	AGTTTTCCCTTCAAGTCAA	AGTTTTCCCTTCAAGTCAA	105.9	0.00149325	251.767	9.61928e-12
mmu-miR-125b*	1.12995	0.101863	3.64457	16	77646562	+	GTCAGGTTCTTGGGACCT	ACAAGTCAGGTTCTTGGGACCT	753.1	3.678e-38	850.967	3.678e-38
solexa-231-1844	-1.19589	0.0869678	3.28617	0	0	+	ATCTCCATAGTGACCA	ATCTCCATAGTGACCA	877.025	3.678e-38	733.367	3.678e-38
mmu-miR-139-3p	1.0736	0.0658105	1.65114	7	108623931	+	GAGACGCGGCCCTGTT	TGGAGACGCGGCCCTGTTGGAG	211.625	5.19521e-23	227.2	1.27836e-15
mmu-miR-455	1.24375	1.23037	8.15624	4	62917937	+	CAGTCCACGGGCATATA	GCAGTCCACGGGCATATACAC	8272.3	3.678e-38	10288.7	3.678e-38
mmu-miR-101a	-1.5289	0.581252	12.8295	4	101019583	-	TACAGTACTGTGATAACTGAA	TACAGTACTGTGATAACTGAA	4443.07	3.678e-38	2906.07	3.678e-38
mmu-miR-27b*	1.34325	1.82327	10.3943	13	63402025	+	AGCTTAGCTGATTGGTGAAC	AGAGCTTAGCTGATTGGTGAAC	6144.98	3.678e-38	8254.27	3.678e-38
mmu-miR-1197	1.82182	1.26762	21.7086	12	110950605	+	TAGGACACATGGTCTACTTCT	TAGGACACATGGTCTACTTCT	256.575	3.678e-38	467.433	3.678e-38
mmu-miR-1224	1.38505	1.38666	10.2328	16	20604524	+	GAGGACTGGGGAGGTG	GTGAGGACTGGGGAGGTGGAG	103.775	0.0158749	143.733	0.00712591
mmu-miR-339-5p	1.35542	0.436539	9.46648	5	139845685	-	CCCTGTCCTCCAGGAGCT	TCCCTGTCCTCCAGGAGCTCACG	2227.9	3.678e-38	3019.73	3.678e-38
mmu-miR-467f	2.02331	0.823481	20.4997	11	69448942	-	ATATACACACACACACCTAC	ATATACACACACACACCTACA	1866.62	3.678e-38	3776.77	3.678e-38
mmu-miR-124	1.67675	0.473793	12.092	2,14,3	1.80629e+24	+,+,+	TAAGGCACGCGGTGAAT	TAAGGCACGCGGTGAATGCC	78.525	0.404282	131.667	0.000861061
mmu-miR-699	-1.33756	0.182635	6.57049	4	43505713	-	GGCAGTGCGACCTGGCT	AGGCAGTGCGACCTGGCTCG	917.7	3.678e-38	686.1	3.678e-38
mmu-miR-33*	-1.89567	0.408352	11.4871	15	82028596	+	AATGTTTCCACAGTGCATC	CAATGTTTCCACAGTGCATCAC	992.95	3.678e-38	523.8	3.678e-38
mmu-let-7g*	1.73759	0.992769	14.63	9	106081232	+	ACTGTACAGGCCACTG	ACTGTACAGGCCACTGCCTTGC	240.275	3.678e-38	417.5	3.678e-38
mmu-miR-344	2.33774	1.6406	26.0498	7,7	6902269169084940	-,-	ATCTAGCCAAAGCCTGAC	TGATCTAGCCAAAGCCTGACTGT	1476.1	3.678e-38	3450.73	3.678e-38
mmu-miR-489	1.45527	1.04859	11.26	6	3671945	-	AATGACACCACATATATGGC	AATGACACCACATATATGGCAGC	541.8	3.678e-38	788.467	3.678e-38
mmu-miR-875-3p	2.80103	0.668869	31.1508	15	35590758	-	CCTGAAAATACTGAGGCTATG	CCTGAAAATACTGAGGCTATG	1515.78	3.678e-38	4245.73	3.678e-38
mmu-miR-429	-1.36793	0.599373	9.12967	4	155428047	-	ATACTGTCTGGTAATGCCG	TAATACTGTCTGGTAATGCCGT	157.95	2.59822e-11	115.467	0.138637
mmu-miR-182	-1.26042	0.545137	6.65467	6	30115987	-	TTTGGCAATGGTAGAACTC	TTTGGCAATGGTAGAACTCACACCG	133.1	6.76907e-07	105.6	0.216767
mmu-miR-668	1.25862	0.0996973	4.71878	12	110972983	+	TCACTCGGCTCGGCCCA	TGTCACTCGGCTCGGCCCACTACC	475.175	3.678e-38	598.067	3.678e-38
mmu-miR-679	2.09909	2.97076	16.875	12	110953796	+	GGACTGTGAGGTGACTCTT	GGACTGTGAGGTGACTCTTGGT	352.375	3.678e-38	739.667	3.678e-38
mmu-miR-469	2.2995	0.651923	15.7607	5	113772110	+	CCTCTTTCATTGATCTTGG	TGCCTCTTTCATTGATCTTGGTGTCC	74.625	0.541721	171.6	1.72158e-08
mmu-miR-30b*	2.10195	1.24802	22.0812	15	68169015	-	GGGATGTGGATGTTTACG	CTGGGATGTGGATGTTTACGTC	513.475	3.678e-38	1079.3	3.678e-38
mmu-miR-615-3p	1.31874	1.41226	6.91517	15	102845399	+	GAGCCTGGGTCTCCCTCT	TCCGAGCCTGGGTCTCCCTCTT	753.675	3.678e-38	993.9	3.678e-38
solexa-447-1003	1.16874	0.43553	4.91784	0	0	+	GCCGAGTGGTCTAAGG	GTCAGGATGGCCGAGTGGTCTAAGG	1436.22	3.678e-38	1678.57	3.678e-38
solexa-1837-257	-1.88943	1.63077	17.3935	0	0	+	TATGGAGGTCTCTGTCTGACT	TATGGAGGTCTCTGTCTGACTT	2499.4	3.678e-38	1322.83	3.678e-38
mmu-miR-350	-1.25417	0.614874	7.48314	1	178702495	-	TCACAAAGCCCATACACT	TTCACAAAGCCCATACACTTTC	6428.35	3.678e-38	5125.6	3.678e-38
mmu-miR-762	2.11378	0.901355	20.2182	7	134852047	+	GGGGCTGGGGCCGGGACAGAGC	GGGGCTGGGGCCGGGACAGAGC	769.775	3.678e-38	1627.13	3.678e-38
mmu-miR-21*	-1.03887	0.0494641	1.11909	11	86397606	-	CAGTCGATGGGCTGTC	CAACAGCAGTCGATGGGCTGTC	123.625	7.28377e-06	119	0.0895657
mmu-miR-136*	-3.83019	1.24204	28.9486	12	110833575	+	ATCATCGTCTCAAATGAGTCT	ATCATCGTCTCAAATGAGTCTT	1805.42	3.678e-38	471.367	3.678e-38
mmu-miR-694	1.50391	0.960424	13.6794	18	66378949	-	CTGAAAATGTTGCCTGAA	CTGAAAATGTTGCCTGAAG	436.95	3.678e-38	657.133	3.678e-38
mmu-miR-292-5p	2.7066	0.386401	29.5141	7	3219200	+	AAACTGGGGGCTCTTTT	ACTCAAACTGGGGGCTCTTTTG	116.85	0.00639445	316.267	2.75732e-13
mmu-miR-16*	1.56913	1.002	15.7268	14	62250753	-	AGTATTGACTGTGCTGCTGA	CCAGTATTGACTGTGCTGCTGA	277.075	3.678e-38	434.767	3.678e-38
mmu-miR-411*:9.1	2.6779	1.53506	24.5537	0	0	+	ACACGGTCCACTAACCC	AACACGGTCCACTAACCCTCAGT	273	3.678e-38	731.067	3.678e-38
mmu-miR-574-3p	1.5237	1.77271	15.3149	5	65361602	+	GCTCATGCACACACCCAC	CACGCTCATGCACACACCCACA	6502.82	3.678e-38	9908.37	3.678e-38
mmu-miR-152	-1.10774	0.851968	3.76607	11	96711752	+	TCAGTGCATGACAGAACTT	TCAGTGCATGACAGAACTTGG	14906.6	3.678e-38	13456.8	3.678e-38
mmu-miR-872*	-2.41837	2.68023	29.0326	4	94331896	+	GAACTATTGCAGTAGCCTCC	TGAACTATTGCAGTAGCCTCCT	8740.73	3.678e-38	3614.3	3.678e-38
mmu-miR-195	-1.33777	1.4261	10.371	11	70048563	+	AGCAGCACAGAAATATTGG	TAGCAGCACAGAAATATTGGC	16054.1	3.678e-38	12000.7	3.678e-38
mmu-miR-466b-5p	-1.068	0.0851185	1.86977	2,2,2	1.04252e+23	+,+,+	GATGTGTGTGTACATGTACATG	GATGTGTGTGTACATGTACATG	110.075	0.00475246	103.067	0.217812
mmu-miR-222	1.10126	0.634163	3.41595	X	18724050	-	AGCTACATCTGGCTACTGG	AGCTACATCTGGCTACTGGGT	6095.6	3.678e-38	6712.83	3.678e-38
mmu-miR-466e-5p	-2.31536	1.29169	22.2281	2	10398267	+	GATGTGTGTGTACATGTACATA	GATGTGTGTGTACATGTACATA	421.55	3.678e-38	182.067	4.02843e-05
solexa-1780-267	-3.50852	0.975427	28.3281	0	0	+	ATCACAGCAAGTCTGTGCT	GAACATCACAGCAAGTCTGTGCT	909.175	3.678e-38	259.133	5.7256e-16
mmu-miR-703	4.31999	1.00281	33.8245	5	98904656	-	AAAACCTTCAGAAGGAAAGA	AAAACCTTCAGAAGGAAAGAA	450.325	3.678e-38	1945.4	3.678e-38
mmu-miR-676	1.53242	2.1981	15.2302	X	97576489	+	GTCCTGAGGTTGTTGAG	CCGTCCTGAGGTTGTTGAGCT	4446.88	3.678e-38	6814.5	3.678e-38
solexa-2012-235	1.11722	0.7343	2.78593	0	0	+	GCGAACACAGAATCCATAC	TGGCGAACACAGAATCCATACT	69.1	0.707949	77.2	0.690227
solexa-103-3961	1.17266	0.120438	4.23013	0	0	+	TCCTCGTTAGTATAGTGG	TCCTCGTTAGTATAGTGG	770.525	3.678e-38	903.567	3.678e-38
mmu-miR-140*	1.07339	0.288565	2.57073	8	110075187	+	TACCACAGGGTAGAACCAC	TACCACAGGGTAGAACCACGG	7379.45	3.678e-38	7921.03	3.678e-38
mmu-miR-551b	1.11331	0.759336	3.68053	3	29315800	+	CGACCCATACTTGGTTTC	GCGACCCATACTTGGTTTCAG	154.075	4.12957e-10	171.533	8.4779e-05
mmu-miR-467b*	-1.00405	0.0129741	0.10337	2	10402919	+	ATATACATACACACACCAACAC	ATATACATACACACACCAACAC	70.25	0.663492	69.9667	0.746731
mmu-miR-29a	-1.01337	0.177622	0.497429	6	31012695	-	TAGCACCATCTGAAATCG	TAGCACCATCTGAAATCGGTTA	15450.1	3.678e-38	15246.3	3.678e-38
solexa-4179-110	-1.22584	0.183398	5.09442	0	0	+	CACTGAACAATGAATGCAA	CTCACTGAACAATGAATGCAA	1260.9	3.678e-38	1028.6	3.678e-38
solexa-2572-184	1.33624	0.850695	8.59414	0	0	+	GTCAAACGGAACCAAGTC	GCTGGTCAAACGGAACCAAGTC	80.35	0.359335	107.367	0.245231
mmu-miR-493	2.05571	1.49594	26.1115	12	110818492	+	AGGTCCTACTGTGTGCCA	TGAAGGTCCTACTGTGTGCCAGG	162.75	9.47537e-12	334.567	1.53924e-26
mmu-miR-369-5p	-2.11752	0.639958	18.0619	12	110981640	+	AGATCGACCGTGTTATATTC	AGATCGACCGTGTTATATTCGC	203	4.63814e-24	95.8667	0.337581
mmu-miR-99b*	-1.25416	0.258569	5.85933	17	17967195	+	TCGTGTCTGTGGGTCCG	CAAGCTCGTGTCTGTGGGTCCG	165.925	2.50521e-12	132.3	0.0026879
mmu-miR-199a-3p,mmu-miR-199b	1.1242	2.30728	4.20863	1,9,2	1.64148e+24	+,-,+	CAGTAGTCTGCACATTGGTTA	ACAGTAGTCTGCACATTGGTTA,ACAGTAGTCTGCACATTGGTTA	19116.7	3.678e-38	21491	3.678e-38
mmu-miR-340-5p	-3.00751	1.35015	28.812	11	49883221	+	TTATAAAGCAATGAGACTGATT	TTATAAAGCAATGAGACTGATT	3352.68	3.678e-38	1114.77	3.678e-38
mmu-miR-297a	1.10934	0.387903	2.73948	2,2,7,10,2,2	1.03939e+48	+,+,-,+,-,+	ATGTATGTGTGCATGTGC	ATGTATGTGTGCATGTGCATGT	1284.42	3.678e-38	1424.87	3.678e-38
mmu-miR-677	-1.35085	0.321745	6.59227	10	127522346	+	TTCAGTGATGATTAGCTTCTG	TTCAGTGATGATTAGCTTCTGA	607.025	3.678e-38	449.367	3.678e-38
mmu-miR-106b*	-1.38569	0.788652	9.80329	5	138606996	-	GCACTGTGGGTACTTGCT	CCGCACTGTGGGTACTTGCTGC	2657.15	3.678e-38	1917.57	3.678e-38
mmu-miR-500	-1.31845	0.711311	8.56908	X	6814843	-	TGCACCTGGGCAAGGGT	AATGCACCTGGGCAAGGGTTCA	1922.17	3.678e-38	1457.9	3.678e-38
mmu-miR-490	1.97356	1.40618	20.5855	6	36371799	+	AACCTGGAGGACTCCAT	CAACCTGGAGGACTCCATGCTG	716.625	3.678e-38	1414.3	3.678e-38
mmu-miR-31	1.21026	2.04948	6.55971	4	88556540	-	GGCAAGATGCTGGCATAG	AGGCAAGATGCTGGCATAGCTG	4288	3.678e-38	5189.6	3.678e-38
mmu-miR-27a*	-1.4556	0.580102	10.44	8	86732583	+	GGCTTAGCTGCTTGTGAG	AGGGCTTAGCTGCTTGTGAGCA	927.7	3.678e-38	637.333	3.678e-38
mmu-miR-465a-3p,mmu-miR-465b-3p,mmu-miR-465c-3p,mmu-miR-465a-3p,mmu-miR-465b-3p,mmu-miR-465c-3p,mmu-miR-465a-3p,mmu-miR-465b-3p,mmu-miR-465c-3p	1.54089	1.05945	12.8158	X,X,X,X,X,X,X,X,X,X,X,X,X,X,X	6.40923e+119	-,-,-,-,-,-,-,-,-,-,-,-,-,-,-	AGGGCCTTTCTAAGTAG	GATCAGGGCCTTTCTAAGTAGA,GATCAGGGCCTTTCTAAGTAGA,GATCAGGGCCTTTCTAAGTAGA,GATCAGGGCCTTTCTAAGTAGA,GATCAGGGCCTTTCTAAGTAGA,GATCAGGGCCTTTCTAAGTAGA,GATCAGGGCCTTTCTAAGTAGA,GATCAGGGCCTTTCTAAGTAGA,GATCAGGGCCTTTCTAAGTAGA	348.175	3.678e-38	536.5	3.678e-38
mmu-miR-20a*	1.54435	1.86136	15.1571	14	115443440	+	CTGCATTACGAGCACTTAAA	ACTGCATTACGAGCACTTAAAG	5344.23	3.678e-38	8253.33	3.678e-38
mmu-miR-326	-1.37346	0.381129	10.021	7	106700837	+	CTCTGGGCCCTTCCTCCA	CCTCTGGGCCCTTCCTCCAGT	4171.82	3.678e-38	3037.47	3.678e-38
mmu-miR-431	-1.11682	0.802389	3.04164	12	110828668	+	TGTCTTGCAGGCCGTCAT	TGTCTTGCAGGCCGTCATGCA	83.65	0.25756	74.9	0.707681
mmu-miR-365	-1.41105	1.79845	10.7054	16,11	1345398779539960	+,+	TAATGCCCCTAAAAATCC	TAATGCCCCTAAAAATCCTTAT	5105.05	3.678e-38	3617.9	3.678e-38
mmu-miR-712	1.60417	0.815621	14.9087	0	0	+	CCTTCACCCGGGCGGT	CTCCTTCACCCGGGCGGTACC	3692.53	3.678e-38	5923.43	3.678e-38
mmu-miR-691	2.55774	1.14204	20.0382	16	74342272	-	TTCCTGAAGAGAGGCAGA	ATTCCTGAAGAGAGGCAGAAAA	110.775	0.00337111	283.333	1.69697e-26
mmu-miR-133b	-1.06229	0.32291	2.4166	1	20672914	+	GTCCCCTTCAACCAGCTA	TTTGGTCCCCTTCAACCAGCTA	21763.9	3.678e-38	20487.7	3.678e-38
mmu-miR-376c	-2.77419	0.80945	20.4706	12	110960979	+	AACATAGAGGAAATTTCACG	AACATAGAGGAAATTTCACGT	584.8	3.678e-38	210.8	2.13725e-16
mmu-miR-590-5p	1.79897	0.954016	18.5039	0	0	+	GAGCTTATTCATAAAAGTGCAG	GAGCTTATTCATAAAAGTGCAG	93.85	0.0768907	168.833	0.00114448
mmu-miR-433	5.44071	0.667494	49.5802	12	110829990	+	ATCATGATGGGCTCCTCG	ATCATGATGGGCTCCTCGGTGT	83.2	0.294664	452.667	3.678e-38
mmu-miR-463	1.36383	0.689092	10.404	X	64052433	-	TGATAGACACCATATAAGG	TGATAGACACCATATAAGGTAG	134.425	2.68834e-06	183.333	4.52252e-05
mmu-miR-669j	1.15315	1.10924	4.17728	2	10399615	+	GCATATACTCACATGCAAACA	TGCATATACTCACATGCAAACA	85.1	0.22912	98.1333	0.320279
mmu-miR-220	1.10489	0.654843	2.55258	6	136349022	-	CACCACAGTGTCAGACACTT	CCACCACAGTGTCAGACACTT	68.725	0.712022	75.9333	0.711696
mmu-miR-542-3p	-1.73407	0.790155	16.693	X	50402614	-	TGTGACAGATTGATAACTGAAA	TGTGACAGATTGATAACTGAAA	3174.1	3.678e-38	1830.43	3.678e-38
mmu-miR-495	-1.21447	0.142804	5.42582	12	110957004	+	ACAAACATGGTGCACTTC	AAACAAACATGGTGCACTTCTT	491.375	3.678e-38	404.6	3.678e-38
mmu-miR-1191	1.14273	0.331292	4.05119	7	27990633	+	CAGTCTTACTATGTAGCCCTA	CAGTCTTACTATGTAGCCCTA	2512.95	3.678e-38	2871.63	3.678e-38
mmu-miR-28	-1.06926	0.659474	2.65452	16	24827953	+	AAGGAGCTCACAGTCTATTG	AAGGAGCTCACAGTCTATTGAG	13908	3.678e-38	13007.2	3.678e-38
mmu-miR-504	1.17493	0.320178	5.80613	X	56350904	-	ACCCTGGTCTGCACTCTAT	AGACCCTGGTCTGCACTCTATC	8782.75	3.678e-38	10319.1	3.678e-38
mmu-miR-200b	-1.18475	0.31615	5.20021	4	155429816	-	TACTGCCTGGTAATGATGA	TAATACTGCCTGGTAATGATGA	1331.5	3.678e-38	1123.87	3.678e-38
mmu-miR-100	-1.32615	1.29203	10.2513	9	41339519	+	ACCCGTAGATCCGAACTTG	AACCCGTAGATCCGAACTTGTG	12787.8	3.678e-38	9642.8	3.678e-38
mmu-miR-652	1.22396	1.41957	6.96845	X	139173602	+	ATGGCGCCACTAGGGTT	AATGGCGCCACTAGGGTTGTG	5073.93	3.678e-38	6210.27	3.678e-38
mmu-miR-197	1.15657	0.85322	4.10089	0	0	+	TCACCACCTTCTCCACC	TTCACCACCTTCTCCACCCAGC	83.35	0.285271	96.4	0.371194
mmu-miR-706	1.59746	1.45534	17.8278	6	119984330	-	GAGAAACCCTGTCTCAAAA	AGAGAAACCCTGTCTCAAAAAA	12295	3.678e-38	19640.8	3.678e-38
mmu-miR-15b*	-1.48397	0.524604	12.246	3	68813734	+	GAATCATTATTTGCTGCTCTA	CGAATCATTATTTGCTGCTCTA	6950.95	3.678e-38	4684.03	3.678e-38
mmu-miR-200c*	1.61449	0.871488	12.4181	6	124668405	-	TCTTACCCAGCAGTGTTTG	CGTCTTACCCAGCAGTGTTTGG	92.475	0.0972901	149.3	0.00016539
mmu-miR-654-5p	1.67129	1.06305	19.4549	12	110961444	+	GTAAGCTGCAGAACATGTGT	TGGTAAGCTGCAGAACATGTGT	167.575	1.82934e-13	280.067	1.55497e-15
mmu-miR-29a*	-1.6452	0.966733	15.4922	6	31012733	-	TGATTTCTTTTGGTGTTCAG	ACTGATTTCTTTTGGTGTTCAG	5824.65	3.678e-38	3540.4	3.678e-38
mmu-miR-96	1.74249	1.47122	18.3957	6	30119529	-	TGGCACTAGCACATTTTT	TTTGGCACTAGCACATTTTTGCT	246.525	3.678e-38	429.567	3.678e-38
mmu-miR-687	1.05215	0.618775	1.3179	14	73606637	-	ATCCTGGAATGCAGCAA	CTATCCTGGAATGCAGCAATGA	62.475	0.854311	65.7333	0.831859
solexa-173-2522	-1.75109	0.867528	16.1225	0	0	+	CGTGGCTTTCGATTGTTA	ACCGTGGCTTTCGATTGTTACT	5438.6	3.678e-38	3105.83	3.678e-38
mmu-let-7e	1.34812	2.46363	11.0685	17	17967329	+	TGAGGTAGGAGGTTGTATA	TGAGGTAGGAGGTTGTATAGTT	15555.2	3.678e-38	20970.3	3.678e-38
mmu-miR-680	1.1259	1.16401	3.16407	6,X,12	1.29642e+25	+,+,-	GGCATCTGCTGACATGG	GGGCATCTGCTGACATGGGGG	64.6	0.817587	72.7333	0.715379
mmu-miR-106a	-1.70859	1.11638	15.1306	X	50095741	-	AAAGTGCTAACAGTGCAGGTA	CAAAGTGCTAACAGTGCAGGTAG	3617.25	3.678e-38	2117.1	3.678e-38
mmu-miR-99a	-1.30546	1.08238	9.49134	16	77599184	+	CCCGTAGATCCGATCTT	AACCCGTAGATCCGATCTTGTG	8831.08	3.678e-38	6764.73	3.678e-38
mmu-miR-802	-1.01113	0.0945069	0.311207	16	93369981	+	TCAGTAACAAAGATTCATC	TCAGTAACAAAGATTCATCCTT	99.9	0.0341514	98.8	0.293843
mmu-miR-101a:9.1	-1.28465	0.373011	7.90877	0	0	+	TACAGTACTGTGATAACTGAAG	TACAGTACTGTGATAACTGAAG	4044.97	3.678e-38	3148.7	3.678e-38
mmu-miR-208a	-1.70981	0.852516	16.2773	14	55567931	-	ATAAGACGAGCAAAAAGCTT	ATAAGACGAGCAAAAAGCTTGT	4235.38	3.678e-38	2477.1	3.678e-38
mmu-miR-466a-5p	1.31577	0.308988	7.96049	2	10429554	+	TATGTGTGTGTACATGTACATA	TATGTGTGTGTACATGTACATA	698.475	3.678e-38	919.033	3.678e-38
mmu-miR-106b	-1.04384	0.140592	1.56664	5	138607036	-	AAGTGCTGACAGTGCAGA	TAAAGTGCTGACAGTGCAGAT	8641.85	3.678e-38	8278.93	3.678e-38
mmu-miR-292-3p	1.15481	1.24987	3.96593	7	3219238	+	AAGTGCCGCCAGGTTTT	AAAGTGCCGCCAGGTTTTGAGTGT	74.5	0.543876	86.0333	0.53465
mmu-miR-465a-5p	1.23699	1.43296	5.96306	X	64092297	-	TATTTAGAATGGCACTGATGT	TATTTAGAATGGCACTGATGTGA	88.225	0.160777	109.133	0.13526
mmu-miR-370	1.23158	0.302535	5.75894	12	110856514	+	CCTGCTGGGGTGGAACCT	GCCTGCTGGGGTGGAACCTGGT	66.175	0.771637	81.5	0.628874
mmu-miR-125a-5p	1.03015	0.869051	1.2314	17	17967780	+	TCCCTGAGACCCTTTAAC	TCCCTGAGACCCTTTAACCTGTGA	22307.1	3.678e-38	22979.7	3.678e-38
mmu-miR-721	1.25464	1.27153	6.6919	5	136851668	-	GTGCAATTAAAAGGGGG	CAGTGCAATTAAAAGGGGGAA	83.875	0.272272	105.233	0.233368
mmu-miR-101b:9.1	-1.3118	0.747665	8.40921	0	0	+	TACAGTACTGTGATAGCTGAAG	TACAGTACTGTGATAGCTGAAG	5163.3	3.678e-38	3936.03	3.678e-38
mmu-miR-471:9.1	1.07848	1.78415	2.01837	0	0	+	TACGTAGTATAGTGCTTTTCACA	TACGTAGTATAGTGCTTTTCACA	68.275	0.725604	73.6333	0.716529
mmu-miR-200a*	1.19274	1.46187	4.73849	4	155429080	-	TACCGGACAGTGCTGG	CATCTTACCGGACAGTGCTGGA	72.55	0.605915	86.5333	0.527343
mmu-miR-431*	1.6116	0.605764	11.3412	12	110828711	+	GGTCGTCTTGCAGGGC	CAGGTCGTCTTGCAGGGCTTCT	67.8	0.739146	109.267	0.0367494
mmu-miR-291a-5p	1.60579	0.691881	11.6925	7	3218932	+	AAGTGGAGGCCCTCTCT	CATCAAAGTGGAGGCCCTCTCT	70.225	0.668495	112.767	0.0311153
mmu-miR-669h-5p	1.00611	0.00798646	0.1738	2	10439800	+	TGCATGGGTGTATAGTTGAG	ATGCATGGGTGTATAGTTGAGTGC	102.375	0.0607686	103	0.274926
mmu-miR-183*	1.08229	0.557154	2.50202	6	30119694	-	ATTACCGAAGGGCCATA	GTGAATTACCGAAGGGCCATAA	103.7	0.013991	112.233	0.1396
mmu-miR-337-5p	1.24467	0.514219	7.30367	12	110824024	+	GGCGTCATGCAGGAGT	GAACGGCGTCATGCAGGAGTT	1075.65	3.678e-38	1338.83	3.678e-38
mmu-miR-449a	1.67636	0.269602	12.5309	13	113827756	+	GGCAGTGTATTGTTAGCTG	TGGCAGTGTATTGTTAGCTGGT	215.725	5.37738e-30	361.633	1.85497e-30
mmu-miR-712*	1.37217	1.00412	10.3952	0	0	+	GAGTCACCCCCGGGTGT	TGCGAGTCACCCCCGGGTGTTG	130.45	1.1357e-05	179	5.75736e-05
mmu-miR-30a	-1.63909	1.64603	18.075	1	23279112	+	GTAAACATCCTCGACTGGA	TGTAAACATCCTCGACTGGAAG	15085.6	3.678e-38	9203.67	3.678e-38
mmu-miR-10a	-1.94881	0.648481	18.3002	11	96178499	+	TACCCTGTAGATCCGAATT	TACCCTGTAGATCCGAATTTGTG	5840.65	3.678e-38	2997.03	3.678e-38
mmu-miR-532-3p	1.56623	1.20117	13.889	X	6825567	-	CCACACCCAAGGCTTG	CCTCCCACACCCAAGGCTTGCA	3347.88	3.678e-38	5243.53	3.678e-38
mmu-miR-125b-5p	-1.06992	1.54721	3.11454	16,9	7764652341390020	+,+	TCCCTGAGACCCTAACTT	TCCCTGAGACCCTAACTTGTGA	26494.3	3.678e-38	24762.9	3.678e-38
mmu-miR-148b	1.19287	1.12819	6.29862	15	103115615	+	TCAGTGCATCACAGAACTT	TCAGTGCATCACAGAACTTTGT	5007.8	3.678e-38	5973.63	3.678e-38
mmu-miR-1192	1.21351	1.14716	5.94651	19	23223939	+	AAACAAACAAACAGACCAAAT	AAACAAACAAACAGACCAAATT	104.875	0.0121939	127.267	0.0320746
mmu-miR-293*	-1.23436	0.188418	4.99169	7	3220356	+	CTCAAACTGTGTGACATTTTG	ACTCAAACTGTGTGACATTTTG	501.85	3.678e-38	406.567	3.678e-38
mmu-miR-148a	-1.34734	0.904727	10.6617	6	51219850	-	TCAGTGCACTACAGAACTTT	TCAGTGCACTACAGAACTTTGT	12467.9	3.678e-38	9253.73	3.678e-38
mmu-miR-15a	-2.03539	1.6412	21.1134	14	62250934	-	GCAGCACATAATGGTTTG	TAGCAGCACATAATGGTTTGTG	5225.45	3.678e-38	2567.3	3.678e-38
mmu-miR-10b	-1.43662	0.552167	10.4926	2	74564130	+	TACCCTGTAGAACCGAATT	TACCCTGTAGAACCGAATTTGTG	3265.57	3.678e-38	2273.1	3.678e-38
mmu-miR-290-5p	2.31109	0.966358	19.367	7	3218639	+	AAACTATGGGGGCACTTT	ACTCAAACTATGGGGGCACTTT	109.025	0.00563147	251.967	7.31233e-20
mmu-miR-188-3p	1.06598	1.57111	1.62663	X	6825139	-	CCACATGCAGGGTTTG	CTCCCACATGCAGGGTTTGCA	67.7	0.737867	72.1667	0.744602
mmu-miR-450b-3p	-1.89598	0.96981	17.951	X	50401207	-	ATTGGGAACATTTTGCAT	ATTGGGAACATTTTGCATGCAT	1776.85	3.678e-38	937.167	3.678e-38
mmu-miR-1195	-1.03188	0.963315	1.30076	17	71209921	-	TGAGTTCGAGGCCAGC	TGAGTTCGAGGCCAGCCTGCTCA	23416.8	3.678e-38	22693.3	3.678e-38
mmu-miR-882	1.11541	1.19979	2.96076	12	110920416	+	GGAGAGAGTTAGCGCATTAG	AGGAGAGAGTTAGCGCATTAGT	76.325	0.492415	85.1333	0.539395
mmu-miR-708	1.76322	3.7275	21.5808	7	103397959	+	GGAGCTTACAATCTAGCTGG	AAGGAGCTTACAATCTAGCTGGG	11952.6	3.678e-38	21075.2	3.678e-38
mmu-miR-98	1.44673	1.40073	13.2217	X	148347771	+	TGAGGTAGTAAGTTGTATTGTT	TGAGGTAGTAAGTTGTATTGTT	11360.9	3.678e-38	16436.2	3.678e-38
mmu-miR-27b	1.05835	2.08826	2.31358	13	63402067	+	TTCACAGTGGCTAAGTTCT	TTCACAGTGGCTAAGTTCTGC	20668.2	3.678e-38	21874.2	3.678e-38
solexa-897-515	-1.1963	0.889329	6.06945	0	0	+	TGGAGTTCATGCAAGTTCT	TTGGAGTTCATGCAAGTTCT	6152.7	3.678e-38	5143.1	3.678e-38
mmu-miR-20a	-1.21395	0.917026	7.33667	14	115443404	+	AAAGTGCTTATAGTGCAGGT	TAAAGTGCTTATAGTGCAGGTAG	10990	3.678e-38	9053.1	3.678e-38
mmu-miR-509-3p	1.07996	1.0572	2.07139	X	65263311	-	TGATTGACATTTCTGTAATGG	TGATTGACATTTCTGTAATGG	74.2	0.552616	80.1333	0.623934
mmu-miR-342-3p	1.03288	0.367944	1.22994	12	109896889	+	CTCACACAGAAATCGCAC	TCTCACACAGAAATCGCACCCGT	9809.15	3.678e-38	10131.7	3.678e-38
mmu-miR-711	1.07761	1.41716	2.1491	9	108872014	+	ACCCGGGGAGAGATGTA	GGGACCCGGGGAGAGATGTAAG	77.95	0.433943	84	0.549943
mmu-miR-93*	-1.02425	0.0460477	0.669514	5	138606786	-	TGCTGAGCTAGCACTTCC	ACTGCTGAGCTAGCACTTCCCG	1057.85	3.678e-38	1032.8	3.678e-38
mmu-miR-464	1.09789	2.42104	2.39552	15	74476224	+	TACCAAGTTTATTCTGTGAGATA	TACCAAGTTTATTCTGTGAGATA	77.725	0.442273	85.3333	0.526979
mmu-miR-743b-5p	1.19101	0.829536	4.42733	X	64030498	-	TGTTCAGACTGGTGTCCAT	TGTTCAGACTGGTGTCCATCA	59.725	0.90025	71.1333	0.777656
mmu-miR-669h-3p	3.8004	0.935431	40.1708	2	10439845	+	TATGCATATACACACATGCACA	TATGCATATACACACATGCACA	124.25	9.12548e-05	472.2	3.678e-38
mmu-miR-698	1.06154	0.882078	1.57212	4	124421095	+	ATTCTCGTTTCCTTCCCT	CATTCTCGTTTCCTTCCCT	74.075	0.555834	78.6333	0.653403
mmu-miR-383	-1.08589	0.570659	2.08632	8	39315254	-	GATCAGAAGGTGACTGTGG	AGATCAGAAGGTGACTGTGGCT	71.85	0.614403	66.1667	0.820318
solexa-2054-231	1.62054	0.662463	15.5262	0	0	+	GAGGTTGCCCTTTGTATATT	AGCGAGGTTGCCCTTTGTATATT	206.125	2.68231e-22	334.033	1.68347e-23
mmu-miR-674*	1.1307	0.631013	4.17053	2	117010921	+	ACAGCTCCCATCTCAGAA	CACAGCTCCCATCTCAGAACAA	5806.5	3.678e-38	6565.43	3.678e-38
mmu-miR-879*	1.10003	1.03126	2.30807	5	9375747	+	TGGCTTCAAGCTTTCG	GCTTATGGCTTCAAGCTTTCGG	63.15	0.847636	69.4667	0.784984
mmu-miR-140	-1.42175	0.712161	12.3115	8	110075148	+	AGTGGTTTTACCCTATGGTA	CAGTGGTTTTACCCTATGGTAG	6129.32	3.678e-38	4311.1	3.678e-38
mmu-miR-688	1.01356	0.217194	0.325615	15	102502253	-	TCGCAGGCGACTACTTAT	TCGCAGGCGACTACTTATTC	57.75	0.924447	58.5333	0.901134
mmu-miR-468	1.13327	1.13256	3.76429	6	81846619	-	ATGACTGATGTGCGTGTG	TATGACTGATGTGCGTGTGTCTG	81.975	0.31736	92.9	0.412523
mmu-miR-23a	1.0222	0.240138	0.892728	8	86732461	+	TCACATTGCCAGGGATTT	ATCACATTGCCAGGGATTTCC	19977.7	3.678e-38	20421.2	3.678e-38
mmu-miR-24	1.00494	0.231151	0.207672	13,8	6340255886732770	+,+	GGCTCAGTTCAGCAGGAA	TGGCTCAGTTCAGCAGGAACAG	25200	3.678e-38	25324.4	3.678e-38
mmu-miR-99b	-1.03848	0.393162	1.40481	17	17967157	+	CCGTAGAACCGACCTTGC	CACCCGTAGAACCGACCTTGCG	8924.8	3.678e-38	8594.07	3.678e-38
mmu-miR-133a	-1.02962	0.308555	1.25445	18,2	1.07829e+16	-,+	GTCCCCTTCAACCAGCTG	TTTGGTCCCCTTCAACCAGCTG	20509.9	3.678e-38	19919.9	3.678e-38
mmu-miR-203*	-1.01233	0.0104414	0.331836	12	113369099	+	AGTGGTTCTTGACAGTTCAAC	AGTGGTTCTTGACAGTTCAACA	112.2	0.000269298	110.833	0.272386
mmu-miR-378*	1.02806	0.143284	1.0589	18	61557551	-	CCTGACTCCAGGTCCTGT	CTCCTGACTCCAGGTCCTGTGT	15064.9	3.678e-38	15487.6	3.678e-38
mmu-miR-186*	1.47391	0.990282	12.8877	3	157207287	+	GCCCTAAGGTGAATTTTTT	GCCCTAAGGTGAATTTTTTGGG	87.5	0.181581	128.967	0.0609066
mmu-miR-718	1.37363	1.34295	10.4719	X	71269217	-	TTCCGCCCGGCCGGGT	CTTCCGCCCGGCCGGGTGTCG	94.3	0.0776578	129.533	0.0399289
mmu-miR-151-5p	1.03651	1.18774	1.48402	15	73085306	-	TCGAGGAGCTCACAGTCTAG	TCGAGGAGCTCACAGTCTAGT	22998.8	3.678e-38	23838.5	3.678e-38
mmu-miR-804	1.30436	0.844786	7.99754	11	50171323	-	TGTGAGTTGTTCCTCAC	TGTGAGTTGTTCCTCACCTGGA	85.125	0.241927	111.033	0.187054
mmu-miR-30d	-1.13007	0.855039	5.19958	15	68172841	-	TGTAAACATCCCCGACTG	TGTAAACATCCCCGACTGGAAG	23846.1	3.678e-38	21101.5	3.678e-38
mmu-miR-196a	2.32088	1.11747	24.0805	15,11	1.02804e+16	+,+	TAGGTAGTTTCATGTTGTTGG	TAGGTAGTTTCATGTTGTTGGG	1432.17	3.678e-38	3323.9	3.678e-38
mmu-miR-412:9.1	1.0622	1.29413	1.53655	0	0	+	ACTTCACCTGGTCCACTAG	ACTTCACCTGGTCCACTAGCCGT	67.125	0.754953	71.3	0.758666
mmu-miR-17	-1.00708	0.103846	0.280972	14	115442905	+	AAAGTGCTTACAGTGCAGG	CAAAGTGCTTACAGTGCAGGTAG	11966.2	3.678e-38	11882.1	3.678e-38
mmu-miR-551b:9.1	1.0801	0.417713	2.26007	0	0	+	CCATACTTGGTTTCAGT	CGACCCATACTTGGTTTCAGTG	90.3	0.112807	97.5333	0.332457
mmu-miR-191	1.01047	0.523868	0.434982	9	108470655	+	AACGGAATCCCAAAAGCA	CAACGGAATCCCAAAAGCAGCTG	25492.2	3.678e-38	25759	3.678e-38
mmu-miR-16	-1.43213	1.30276	14.6343	14,3	6225079568813830	-,+	AGCAGCACGTAAATATTGG	TAGCAGCACGTAAATATTGGCG	21931.1	3.678e-38	15313.6	3.678e-38
mmu-miR-379	1.03539	0.227235	1.25114	12	110947274	+	TGGTAGACTATGGAACGTA	TGGTAGACTATGGAACGTAGG	5782.35	3.678e-38	5986.97	3.678e-38
mmu-miR-27a	1.00124	0.0465491	0.0501967	8	86732625	+	TTCACAGTGGCTAAGTTCC	TTCACAGTGGCTAAGTTCCGC	22488.3	3.678e-38	22516.2	3.678e-38
mmu-miR-204	-1.68706	0.728015	16.1498	19	22825099	+	TTCCCTTTGTCATCCTATG	TTCCCTTTGTCATCCTATGCCT	6516.15	3.678e-38	3862.43	3.678e-38
mmu-miR-202-3p	1.03285	0.298447	0.929425	7	147143616	-	AGGTATAGCGCATGGGAA	AGAGGTATAGCGCATGGGAAGA	86.75	0.187709	89.6	0.458646
solexa-3062-153	1.10372	0.214944	2.61887	0	0	+	GGATATGATGACTGATTACCTG	TGGATATGATGACTGATTACCTGAGA	2076.25	3.678e-38	2291.6	3.678e-38
mmu-miR-653	1.0676	0.777156	1.68399	6	3671376	-	GTGTTGAAACAATCTCTACTG	GTGTTGAAACAATCTCTACTG	71.5	0.64115	76.3333	0.691025
mmu-miR-673-3p	1.048	0.656731	1.14435	12	110810253	+	GCTGAGTTCTGTGCACC	TCCGGGGCTGAGTTCTGTGCACC	62.5	0.855747	65.5	0.835374
mmu-miR-300*	1.06353	0.556251	1.82305	12	110962527	+	TTGAAGAGAGGTTATC	TTGAAGAGAGGTTATCCTTTGT	93.65	0.0849821	99.6	0.29572
mmu-miR-135a*	1.0309	1.20454	0.770157	9	106056509	+	TATAGGGATTGGAGCCG	TATAGGGATTGGAGCCGTGGCG	63.925	0.827163	65.9	0.826903
mmu-miR-876-3p	1.06436	0.985397	1.66736	4	36592438	-	TAGTGGTTTACAAAGTAATTC	TAGTGGTTTACAAAGTAATTCA	69.4	0.695691	73.8667	0.728246
mmu-miR-300	1.14276	0.685266	3.95986	12	110962572	+	TATGCAAGGGCAAGCTCT	TATGCAAGGGCAAGCTCTCTTC	95.325	0.0737759	108.933	0.176054
mmu-miR-465b-5p	1.05076	1.20329	1.29254	X,X	6408900864082440	-,-	AGAATGGTGCTGATCT	TATTTAGAATGGTGCTGATCTG	71.25	0.641591	74.8667	0.704117
mmu-miR-218-1*	1.06844	0.847545	1.77053	5	48615243	+	AAACATGGTTCCGTCAA	AAACATGGTTCCGTCAAGCACC	75	0.533894	80.1333	0.621153
mmu-miR-376c*	1.64292	1.14489	16.6771	12	110960942	+	GTGGATATTCCTTCTATGTTT	GTGGATATTCCTTCTATGTTTA	122.1	0.000214125	200.6	1.75584e-06
mmu-miR-30b	-1.08391	0.906025	3.36721	15	68169053	-	TGTAAACATCCTACACTCAGC	TGTAAACATCCTACACTCAGCT	22154.3	3.678e-38	20439.3	3.678e-38
mmu-miR-339-3p	-1.02664	0.0163941	0.67364	5	139845650	-	CCTCGGCGACAGAGCC	TGAGCGCCTCGGCGACAGAGCCG	1191.55	3.678e-38	1160.63	3.678e-38
mmu-miR-21	1.02251	0.596721	0.917073	11	86397644	-	TAGCTTATCAGACTGATGTTG	TAGCTTATCAGACTGATGTTGA	23005	3.678e-38	23522.9	3.678e-38
mmu-let-7i	1.07876	1.02377	3.26439	10	122422776	-	TGAGGTAGTAGTTTGTGCT	TGAGGTAGTAGTTTGTGCTGTT	23333.1	3.678e-38	25170.7	3.678e-38
mmu-miR-708*	1.461	0.841609	12.5782	7	103398005	+	CAACTAGACTGTGAGCTTCTA	CAACTAGACTGTGAGCTTCTAG	116.975	0.000393791	170.9	0.000262547
mmu-miR-145	-1.03139	0.409748	1.26662	18	61807543	-	GTCCAGTTTTCCCAGGAAT	GTCCAGTTTTCCCAGGAATCCCT	20565.8	3.678e-38	19939.9	3.678e-38
mmu-miR-337-3p	1.15402	0.0912052	4.40049	12	110824058	+	CAGCTCCTATATGATGCCT	TTCAGCTCCTATATGATGCCT	348.375	3.678e-38	402.033	2.41227e-26
mmu-miR-666-3p	1.64977	1.03213	16.1133	12	110955349	+	TGCAGCGTGATCGCCT	GGCTGCAGCGTGATCGCCTGCT	80.9	0.359113	133.467	0.0471597
mmu-miR-322*	-1.89721	3.17719	20.3612	X	50407467	-	AACATGAAGCGCTGCAA	AAACATGAAGCGCTGCAACAC	4962.9	3.678e-38	2615.9	3.678e-38
mmu-miR-207	5.83601	0.576165	26.0622	4	40670000	+	CTTCTCCTGGCTCTCCTC	GCTTCTCCTGGCTCTCCTCCCTC	109.15	0.00292163	637	3.678e-38
mmu-miR-701	1.19157	0.140501	4.87575	5	111433188	+	TAGCCGCTGAAATAGATG	TTAGCCGCTGAAATAGATGGA	1578.67	3.678e-38	1881.1	3.678e-38
mmu-miR-574-5p	2.83059	1.45985	31.6613	5	65361566	+	TGAGTGTGTGTGTGTGAG	TGAGTGTGTGTGTGTGAGTGTGT	2882.97	3.678e-38	8160.53	3.678e-38
mmu-miR-126-5p	-1.03942	0.538148	1.64435	2	26446884	+	CATTATTACTTTTGGTACGC	CATTATTACTTTTGGTACGCG	29467.4	3.678e-38	28350	3.678e-38
mmu-miR-302c	2.12744	1.50814	28.0002	3	127248323	+	AAGTGCTTCCATGTTTCAG	AAGTGCTTCCATGTTTCAGTGG	140.2	4.47527e-07	298.267	2.86846e-19
mmu-miR-302c*	2.6466	1.21393	28.9922	3	127248285	+	TAACATGGGGTTACCTGC	GCTTTAACATGGGGTTACCTGC	74.75	0.534763	197.833	2.46119e-07
mmu-let-7b	1.15219	1.65021	6.2591	15	85537754	+	TGAGGTAGTAGGTTGTGTG	TGAGGTAGTAGGTTGTGTGGTT	24886.3	3.678e-38	28673.7	3.678e-38
mmu-miR-125b-3p	1.29027	0.179175	6.71789	9	41390062	+	GTTAGGCTCTTGGGAG	ACGGGTTAGGCTCTTGGGAGCT	261.65	3.678e-38	337.6	6.56745e-32
mmu-miR-323-5p	2.09253	0.747602	15.5617	12	110950732	+	AGGTGGTCCGTGGCGC	AGGTGGTCCGTGGCGCGTTCGC	119.425	0.000455304	249.9	9.14955e-21
mmu-miR-212	1.50948	1.90069	13.7327	11	74986944	+	AACAGTCTCCAGTCACGG	TAACAGTCTCCAGTCACGGCCA	4920.73	3.678e-38	7427.73	3.678e-38
mmu-let-7f	1.09132	0.994955	3.81219	X,13	1.48347e+16	+,-	TGAGGTAGTAGATTGTATAGT	TGAGGTAGTAGATTGTATAGTT	24549.3	3.678e-38	26791.2	3.678e-38
mmu-miR-590-3p	1.00922	0.176629	0.234222	0	0	+	TAATTTTATGTATAAGCTAGT	TAATTTTATGTATAAGCTAGT	59.65	0.898887	60.2	0.886894
mmu-miR-126-3p	-1.45349	1.36429	15.1762	2	26446921	+	TCGTACCGTGAGTAATAAT	TCGTACCGTGAGTAATAATGCG	25586.9	3.678e-38	17603.8	3.678e-38
solexa-2546-186	1.06981	0.961939	1.96358	0	0	+	TGATGAGCTATGTTTACTGAGC	GACTTATGATGAGCTATGTTTACTGAGC	87.025	0.191334	93.1	0.397183
mmu-miR-302b*	1.03322	0.605501	0.836929	3	127248155	+	CTTTAACATGGGAATGCTT	ACTTTAACATGGGAATGCTTTCT	66.975	0.758806	69.2	0.790782
mmu-miR-202-5p	-1.09547	0.596223	2.39695	7	147143652	-	TTCCTATGCATATACTTCTTT	TTCCTATGCATATACTTCTTT	76.975	0.440193	70.2667	0.77472
mmu-miR-412	-1.00935	0.0958106	0.257962	12	110981549	+	TTCACCTGGTCCACTAG	TTCACCTGGTCCACTAGCCG	81.825	0.330444	81.0667	0.582283
mmu-miR-299*	-2.06711	2.28212	18.7892	12	110948853	+	GGTTTACCGTCCCACATA	TGGTTTACCGTCCCACATACAT	1911.25	3.678e-38	924.6	3.678e-38
mmu-miR-23b	1.03747	0.578227	1.64609	13	63401836	+	TCACATTGCCAGGGATTA	ATCACATTGCCAGGGATTACC	26190.2	3.678e-38	27171.7	3.678e-38
mmu-miR-467g	-1.01777	0.313126	0.439777	5	35075542	-	ATACATACACACACATATAT	TATACATACACACACATATAT	61.1	0.873687	60.0333	0.887251
mmu-miR-290-3p	5.17832	0.587167	20.3018	7	3218674	+	GCCGCCTAGTTTTAAGC	AAAGTGCCGCCTAGTTTTAAGCCC	65.8	0.790027	340.733	3.678e-38
mmu-miR-434-3p	-1.19129	0.321374	4.8854	12	110832774	+	TTGAACCATCACTCGACT	TTTGAACCATCACTCGACTCCT	1702.75	3.678e-38	1429.33	3.678e-38
solexa-239-1823	1.09618	0.667011	3.41574	0	0	+	CTAGCCCTAGCCCTACA	CTAGCCCTAGCCCTACA	16043.2	3.678e-38	17586.4	3.678e-38
mmu-let-7g	1.05005	0.892353	2.06919	9	106081176	+	TGAGGTAGTAGTTTGTACAG	TGAGGTAGTAGTTTGTACAGTT	23522.9	3.678e-38	24700.2	3.678e-38
mmu-miR-361	1.06328	0.766291	2.29297	X	110188498	-	TATCAGAATCTCCAGGGG	TTATCAGAATCTCCAGGGGTAC	8845.38	3.678e-38	9405.13	3.678e-38
mmu-miR-22*	-1.52882	2.8758	15.9221	11	75277235	+	TCTTCAGTGGCAAGCTTTA	AGTTCTTCAGTGGCAAGCTTTA	16378.9	3.678e-38	10713.4	3.678e-38
mmu-miR-378	1.01185	0.488668	0.504138	18	61557513	-	CTGGACTTGGAGTCAGAAG	ACTGGACTTGGAGTCAGAAGG	23517.3	3.678e-38	23796	3.678e-38
mmu-miR-872	1.6616	0.742053	18.1646	4	94331857	+	AAGGTTACTTGTTAGTTC	AAGGTTACTTGTTAGTTCAGG	113.425	0.000954345	188.467	2.33258e-05
mmu-miR-26a	-1.0351	1.21927	1.44503	10,9	1.26433e+17	+,+	CAAGTAATCCAGGATAGGC	TTCAAGTAATCCAGGATAGGCT	25645.4	3.678e-38	24775.8	3.678e-38
mmu-miR-876-5p	1.16064	1.03012	4.00768	4	36592477	-	TGGATTTCTCTGTGAATCACT	TGGATTTCTCTGTGAATCACTA	78.175	0.423541	90.7333	0.373702
mmu-let-7c	1.11169	2.11161	4.27347	15,16	8553704577599910	+,+	TGAGGTAGTAGGTTGTATG	TGAGGTAGTAGGTTGTATGGTT	21282.4	3.678e-38	23659.5	3.678e-38
mmu-miR-150*	1.15086	0.833066	3.74176	7	52377167	+	CTGGTACAGGCCTGGG	CTGGTACAGGCCTGGGGGATAG	71.425	0.634304	82.2	0.61326
solexa-200-2167	1.58044	0.691926	12.0681	0	0	+	GTCAGGATGGCCGAGC	GTCAGGATGGCCGAGCGGTCTAAG	382.425	3.678e-38	604.4	3.678e-38
mmu-miR-331-3p	1.12236	0.18122	4.02072	10	93426549	-	CCCTGGGCCTATCCTAGA	GCCCCTGGGCCTATCCTAGAA	4206.77	3.678e-38	4721.53	3.678e-38
mmu-miR-499	-1.09764	0.861806	3.66389	2	155448628	+	TTAAGACTTGCAGTGATGTTT	TTAAGACTTGCAGTGATGTTT	19473.7	3.678e-38	17741.4	3.678e-38
mmu-miR-369-3p	-1.478	0.522579	11.506	12	110981675	+	AATAATACATGGTTGATCTT	AATAATACATGGTTGATCTTT	362.7	3.678e-38	245.4	2.6836e-12
mmu-miR-674	1.55312	1.66669	17.2996	2	117010886	+	CACTGAGATGGGAGTGGT	GCACTGAGATGGGAGTGGTGTA	9508.25	3.678e-38	14767.5	3.678e-38
mmu-miR-196a*	1.70826	0.841306	19.7168	15	102803831	+	TCGGCAACAAGAAACTG	TCGGCAACAAGAAACTGCCTGA	114.6	0.00164369	195.767	3.58145e-06
mmu-miR-301b	-1.00572	0.251219	0.145129	16	17124536	-	AGTGCAATGGTATTGTC	CAGTGCAATGGTATTGTCAAAGC	64.5	0.813213	64.1333	0.842665
solexa-5560-82	-1.71865	1.86127	19.8399	0	0	+	AATTCGTGAAGCGTTCC	AATTCGTGAAGCGTTCC	10206.9	3.678e-38	5938.87	3.678e-38
mmu-miR-324-5p	-1.62067	1.48613	14.3739	11	69825561	+	ATCCCCTAGGGCATTGGT	CGCATCCCCTAGGGCATTGGTGT	3032.88	3.678e-38	1871.37	3.678e-38
mmu-let-7d	1.10479	1.4298	4.08089	13	48631469	-	AGAGGTAGTAGGTTGCATA	AGAGGTAGTAGGTTGCATAGTT	22153.8	3.678e-38	24475.4	3.678e-38
mmu-miR-15b	1.0441	0.592687	1.75754	3	68813696	+	GCAGCACATCATGGTTTA	TAGCAGCACATCATGGTTTACA	19791.6	3.678e-38	20664.3	3.678e-38
mmu-miR-484	1.19398	2.05031	5.496	16	14159722	+	TCAGGCTCAGTCCCCTCC	TCAGGCTCAGTCCCCTCCCGAT	4311.98	3.678e-38	5148.43	3.678e-38
mmu-miR-93	1.00261	0.0255077	0.0923987	5	138606825	-	AAGTGCTGTTCGTGCAG	CAAAGTGCTGTTCGTGCAGGTAG	7092.3	3.678e-38	7110.83	3.678e-38
mmu-let-7a	1.09362	1.87731	3.65965	9,13	4134481448633630	+,-	TGAGGTAGTAGGTTGTATAG	TGAGGTAGTAGGTTGTATAGTT	22789.5	3.678e-38	24923	3.678e-38
mmu-miR-132	1.05596	0.420737	2.03097	11	74987224	+	TAACAGTCTACAGCCATGG	TAACAGTCTACAGCCATGGTCG	8711.75	3.678e-38	9199.3	3.678e-38
mmu-miR-693-3p	3.71075	0.58728	38.9503	17	46368529	+	CTTTCAGATGTGGCTGTA	GCAGCTTTCAGATGTGGCTGTAA	88.85	0.152478	329.7	6.9052e-16
mmu-miR-146a	-1.11539	0.620687	4.1636	11	43187959	-	AGAACTGAATTCCATGGGT	TGAGAACTGAATTCCATGGGTT	17153.7	3.678e-38	15379.1	3.678e-38
mmu-miR-883a-5p	1.1495	0.807566	3.68188	X	64034000	-	TGCTGAGAGAAGTAGCAGTTAC	TGCTGAGAGAAGTAGCAGTTAC	72.35	0.606055	83.1667	0.598997
mmu-miR-717	-1.00906	0.102224	0.220569	X	49775660	-	CTCAGACAGAGATACCTTCTCT	CTCAGACAGAGATACCTTCTCT	75.175	0.52899	74.5	0.699702
mmu-miR-30a*	1.00683	0.0543705	0.25323	1	23279153	+	CTTTCAGTCGGATGTTTG	CTTTCAGTCGGATGTTTGCAGC	7676.57	3.678e-38	7729	3.678e-38
mmu-miR-423-3p	-1.06183	0.320171	1.99149	11	76891611	-	AGCTCGGTCTGAGGCCCC	AGCTCGGTCTGAGGCCCCTCAGT	3667.85	3.678e-38	3454.27	3.678e-38
mmu-miR-692	1.72515	0.913811	20.6135	4,17	1251820487099620	+,-	TCTCTTTGAGCGCCTCA	ATCTCTTTGAGCGCCTCACTC	110	0.0048521	189.767	3.5014e-05
mmu-miR-22	-1.05413	1.41725	2.21316	11	75277273	+	AAGCTGCCAGTTGAAGAA	AAGCTGCCAGTTGAAGAACTGT	24282.4	3.678e-38	23035.5	3.678e-38
mmu-miR-1190	1.05965	0.341984	1.84477	12	102259924	-	CAGCTGAGGTTCCCCT	TCAGCTGAGGTTCCCCTCTGTC	153.95	1.10597e-09	163.133	0.000312997
mmu-miR-26b	1.01413	0.282868	0.54393	1	74440897	+	TTCAAGTAATTCAGGATAGGT	TTCAAGTAATTCAGGATAGGT	20078	3.678e-38	20361.6	3.678e-38
mmu-miR-451	-1.64257	2.38182	19.839	11	77886687	+	AACCGTTACCATTACTGAGT	AAACCGTTACCATTACTGAGTT	28981.8	3.678e-38	17644.2	3.678e-38
mmu-miR-509-5p	-1.15651	2.10577	4.0669	X	65263346	-	CTCCAGAATGTGGCAATC	TACTCCAGAATGTGGCAATCAT	101.85	0.0226674	88.0667	0.475689
mmu-miR-335-3p	-1.30744	0.33293	8.07407	6	30691353	+	TTTTTCATTATTGCTCCTGAC	TTTTTCATTATTGCTCCTGACC	4680.6	3.678e-38	3579.97	3.678e-38
mmu-miR-376b	-1.81857	0.579398	17.1355	12	110961717	+	ATCATAGAGGAACATCCACTT	ATCATAGAGGAACATCCACTT	786.35	3.678e-38	432.4	3.678e-38
mmu-miR-693-5p	-1.04444	0.506769	1.25883	17	46368499	+	AGCCACATCCGAAAGTT	CAGCCACATCCGAAAGTTTTC	88.325	0.167728	84.5667	0.540187
mmu-miR-669g	9.6509	0.57147	31.033	2	10398796	+	GCATTGTATGTGTTGACATGA	TGCATTGTATGTGTTGACATGAT	60.25	0.889541	581.467	3.678e-38
mmu-miR-130a	-1.04643	0.457033	1.7817	2	84581295	-	CAGTGCAATGTTAAAAGGG	CAGTGCAATGTTAAAAGGGCAT	13542.5	3.678e-38	12941.7	3.678e-38
mmu-miR-449c	-1.0156	0.283084	0.404343	13	113826215	+	AGGCAGTGCATTGCTAG	AGGCAGTGCATTGCTAGCTGG	69.975	0.685884	68.9	0.791681
mmu-miR-351	-1.06053	0.349421	1.98721	X	50406516	-	CCTGAGGAGCCCTTTGA	TCCCTGAGGAGCCCTTTGAGCCTG	6712.75	3.678e-38	6329.6	3.678e-38
mmu-miR-101b	-2.16042	1.1183	22.3172	19	29209828	+	TACAGTACTGTGATAGCTGAA	TACAGTACTGTGATAGCTGAA	4869.07	3.678e-38	2253.77	3.678e-38
mmu-miR-471	1.10126	0.66326	2.61907	X	64045831	-	TACGTAGTATAGTGCTTTTCAC	TACGTAGTATAGTGCTTTTCAC	83.45	0.271764	91.9	0.415402
mmu-miR-323-3p	2.47217	0.805342	26.171	12	110950767	+	ACATTACACGGTCGACCT	CACATTACACGGTCGACCTCT	183.725	1.08796e-17	454.2	3.678e-38
solexa-3014-156	1.05324	1.20299	1.35966	0	0	+	CTATACGGCCTCCTAG	CTATACGGCCTCCTAGCTTTC	69.5	0.691544	73.2	0.731887
mmu-miR-367	-1.1751	1.21184	4.52698	3	127248696	+	ATTGCACTTTAGCAATGG	AATTGCACTTTAGCAATGGTGA	99.1	0.0385208	84.3333	0.543733
mmu-miR-181c	-1.79669	0.714776	15.8424	8	86702845	-	AACATTCAACCTGTCGGT	AACATTCAACCTGTCGGTGAGT	822.825	3.678e-38	457.967	3.678e-38
mmu-miR-374	-1.11441	0.323478	4.04413	X	100768473	-	ATATAATACAACCTGCTAAGTG	ATATAATACAACCTGCTAAGTG	8721.77	3.678e-38	7826.33	3.678e-38
mmu-miR-29c	-2.22649	1.13872	26.7819	1	196863793	+	TAGCACCATTTGAAATCG	TAGCACCATTTGAAATCGGTTA	15880.9	3.678e-38	7132.7	3.678e-38
mmu-miR-546	1.67606	1.16606	17.6053	10	126435526	+	ATGGTGGCACGGAGTC	ATGGTGGCACGGAGTC	127.7	2.99283e-05	214.033	1.15634e-07
mmu-miR-345-5p	-1.74275	0.610273	13.9391	12	110075198	+	GCTGACCCCTAGTCCAG	GCTGACCCCTAGTCCAGTGCTT	1396	3.678e-38	801.033	3.678e-38
mmu-miR-133a*	-1.56609	2.59217	16.7441	2,18	1.80133e+16	+,-	GCTGGTAAAATGGAACCA	GCTGGTAAAATGGAACCAAAT	16761	3.678e-38	10702.4	3.678e-38
mmu-miR-17*	1.38369	0.552196	10.5467	14	115442942	+	ACTGCAGTGAGGGCACTT	ACTGCAGTGAGGGCACTTGTAG	2777.53	3.678e-38	3843.23	3.678e-38
mmu-miR-695	1.1376	0.486625	3.47669	2	155182566	+	GATTGGGCATAGGTGACT	AGATTGGGCATAGGTGACTGAA	83.275	0.287356	94.7333	0.421102
mmu-miR-30c	-1.05595	1.54894	2.23745	1,4	2.32986e+16	+,-	TGTAAACATCCTACACTCTCA	TGTAAACATCCTACACTCTCAGC	21956	3.678e-38	20792.7	3.678e-38
mmu-miR-193b	-1.15966	0.36394	4.82633	16	13449662	+	TGGCCCACAAAGTCCCG	AACTGGCCCACAAAGTCCCGCT	6318.2	3.678e-38	5448.3	3.678e-38
mmu-miR-568	1.0999	0.956232	2.61606	16	43640777	+	ATGTATAAATGTATACACAC	ATGTATAAATGTATACACAC	77.825	0.442132	85.6	0.530671
mmu-miR-879	1.04291	0.801651	1.16868	5	9375713	+	AGAGGCTTATAGCTCTAAGCC	AGAGGCTTATAGCTCTAAGCC	76.9	0.47403	80.2	0.608217
mmu-miR-124*	-1.009	0.107341	0.223258	14,2,3	6.52095e+24	+,+,+	TGTTCACAGCGGACCT	CGTGTTCACAGCGGACCTTGAT	62.625	0.846972	62.0667	0.869172
mmu-miR-302a*	-1.02539	0.346649	0.714787	3	127248418	+	ACTTAAACGTGGTTGTACTTGC	ACTTAAACGTGGTTGTACTTGC	88.525	0.169688	86.3333	0.49442
mmu-miR-155	1.42355	1.80022	13.8127	16	84714387	+	TTAATGCTAATTGTGATAGGG	TTAATGCTAATTGTGATAGGGGT	11952.8	3.678e-38	17015.4	3.678e-38
mmu-miR-697	1.06614	0.515919	1.77002	4	124409011	+	ACATCCTGGTCCTGTGG	AACATCCTGGTCCTGTGGAGA	87.95	0.173435	93.7667	0.398128
mmu-miR-143	-1.51171	5.43558	16.8946	18	61808874	-	TGAGATGAAGCACTGTAGC	TGAGATGAAGCACTGTAGCTC	23597.3	3.678e-38	15609.7	3.678e-38
mmu-miR-467d	1.05519	0.206137	1.69634	2	10429266	+	TGCGCGCATGTATATGCG	TAAGTGCGCGCATGTATATGCG	94.075	0.102729	99.2667	0.30111
mmu-miR-714	4.8537	0.611038	23.9527	0	0	+	ACGAGGGCCGGTCGGT	CGACGAGGGCCGGTCGGTCGC	80.2	0.374402	389.267	4.59111e-36
mmu-miR-32	-1.50956	0.872798	12.883	4	56908166	-	TATTGCACATTACTAAGTTGC	TATTGCACATTACTAAGTTGCA	236.75	2.37264e-36	156.833	0.00115122
mmu-miR-669b	1.35259	0.384182	11.1172	2	10389440	+	GTTTTGTGTGCATGTGCA	AGTTTTGTGTGCATGTGCATGT	225.075	6.59398e-35	304.433	3.17643e-18
mmu-miR-322	-2.15606	1.69404	24.9385	X	50407505	-	CAGCAGCAATTCATGTTT	CAGCAGCAATTCATGTTTTGGA	8935.3	3.678e-38	4144.27	3.678e-38
mmu-miR-423-5p	1.47501	0.428002	10.8723	11	76891647	-	GGCAGAGAGCGAGACTT	TGAGGGGCAGAGAGCGAGACTTT	978.525	3.678e-38	1443.33	3.678e-38
mmu-miR-216b	1.70926	1.0032	19.9195	11	28646203	+	AAATCTCTGCAGGCAAAT	AAATCTCTGCAGGCAAATGTGA	151.45	4.13075e-09	258.867	1.14989e-12
mmu-miR-486	1.1064	1.35997	3.97807	8	24253058	+	TCCTGTACTGAGCTGCCC	TCCTGTACTGAGCTGCCCCGAG	19442.8	3.678e-38	21511.4	3.678e-38
mmu-miR-25	1.18351	0.539727	6.24332	5	138606582	-	ATTGCACTTGTCTCGGTC	CATTGCACTTGTCTCGGTCTGA	13924.4	3.678e-38	16479.6	3.678e-38
mmu-miR-10a*	2.35231	0.952965	35.3025	11	96178540	+	CAAATTCGTATCTAGG	CAAATTCGTATCTAGGGGAATA	165.1	7.05178e-12	388.367	7.25003e-32
mmu-miR-294	1.22904	1.03239	6.314	7	3220691	+	AAGTGCTTCCCTTTTGTG	AAAGTGCTTCCCTTTTGTGTGT	89.175	0.163222	109.6	0.170835
mmu-miR-24-2*	-1.4573	0.886374	12.8323	8	86732737	+	GTGCCTACTGAGCTGAAAC	GTGCCTACTGAGCTGAAACAGT	7101.32	3.678e-38	4872.93	3.678e-38
mmu-miR-720	1.15852	0.41496	5.71068	3	88920550	-	ATCTCGCTGGGGCCTCC	ATCTCGCTGGGGCCTCCA	11608.8	3.678e-38	13448.9	3.678e-38
mmu-miR-181a	-1.26391	2.04298	8.98246	1,2	1.39863e+16	+,+	ATTCAACGCTGTCGGTGA	AACATTCAACGCTGTCGGTGAGT	16246	3.678e-38	12853.7	3.678e-38
mmu-miR-18a	-1.08746	0.233237	3.01943	14	115443088	+	TAAGGTGCATCTAGTGCAGA	TAAGGTGCATCTAGTGCAGATAG	3792.53	3.678e-38	3487.5	3.678e-38
mmu-miR-30e	-2.30878	1.59093	28.2911	4	120445287	-	GTAAACATCCTTGACTGGA	TGTAAACATCCTTGACTGGAAG	11847.8	3.678e-38	5131.63	3.678e-38
mmu-miR-764-3p	4.40211	0.947036	31.0052	X	143436866	+	AGGCCATAGTGGCAACT	AGGAGGCCATAGTGGCAACTGT	126.25	1.30877e-05	555.767	3.678e-38
mmu-miR-192	-1.0938	0.154323	2.95683	19	6264856	+	CTGACCTATGAATTGACA	CTGACCTATGAATTGACAGCC	4274.2	3.678e-38	3907.67	3.678e-38
mmu-miR-28*	1.36837	1.30721	11.0865	16	24827993	+	AGATTGTGAGCTGCTGGA	CACTAGATTGTGAGCTGCTGGA	5879.68	3.678e-38	8045.57	3.678e-38
solexa-1328-360	1.29624	0.535971	9.41486	0	0	+	CTTCCCCCCCTTCTTC	ACGCCCTTCCCCCCCTTCTTCA	7646.7	3.678e-38	9911.93	3.678e-38
mmu-miR-376a	1.31711	0.109467	6.74129	12	110962033	+	ATCGTAGAGGAAAATCCAC	ATCGTAGAGGAAAATCCACGT	684.225	3.678e-38	901.2	3.678e-38
mmu-miR-327	1.92361	1.00123	23.4632	14	45567177	-	TGAGGGGCATGAGGAT	ACTTGAGGGGCATGAGGAT	144	3.85042e-08	277	2.50761e-14
mmu-miR-467a	-1.04125	0.0933628	1.21473	2	10397981	+	GTGCCTGCATGTATATGC	TAAGTGCCTGCATGTATATGCG	1288.12	3.678e-38	1237.1	3.678e-38
mmu-miR-7a	1.15385	0.287932	4.76105	7,13	8603318058494220	+,-	TGGAAGACTAGTGATTTTGTT	TGGAAGACTAGTGATTTTGTTGT	6402.3	3.678e-38	7387.3	3.678e-38
mmu-miR-710	1.18077	0.8492	4.82407	8	66993220	-	CAAGTCTTGGGGAGAGTT	CCAAGTCTTGGGGAGAGTTGAG	85.65	0.231043	101.133	0.264543
mmu-miR-744	2.61894	1.08445	28.8632	11	65548323	-	GGGGCTAGGGCTAACAGC	TGCGGGGCTAGGGCTAACAGCA	2013.42	3.678e-38	5273.03	3.678e-38
mmu-miR-145*	-5.1189	1.31197	32.7966	18	61807503	-	TTCCTGGAAATACTGTTCTTG	ATTCCTGGAAATACTGTTCTTG	1308.05	3.678e-38	255.533	2.23951e-29
mmu-miR-494	-1.3184	0.520145	6.94196	12	110953576	+	AACATACACGGGAAACCT	TGAAACATACACGGGAAACCTC	1133.3	3.678e-38	859.6	3.678e-38
mmu-miR-291a-3p	1.37106	0.941852	11.9357	7	3218968	+	AAGTGCTTCCACTTTGTGT	AAAGTGCTTCCACTTTGTGTGC	198.8	6.59278e-22	272.567	1.12099e-15
mmu-miR-301a	-6.28728	2.36036	38.5792	11	86926555	+	CAGTGCAATAGTATTGTCAAAG	CAGTGCAATAGTATTGTCAAAGC	1049.97	3.678e-38	167	2.19052e-06
mmu-miR-139-5p	-1.00292	0.0233542	0.104071	7	108623895	+	TCTACAGTGCACGTGTCT	TCTACAGTGCACGTGTCTCCAG	15363.8	3.678e-38	15319.1	3.678e-38
mmu-miR-127	-1.45337	0.483803	9.5289	12	110831097	+	TCGGATCCGTCTGAGCTT	TCGGATCCGTCTGAGCTTGGCT	2430.47	3.678e-38	1672.3	3.678e-38
mmu-miR-186	-5.40515	2.6456	37.1385	3	157207248	+	CAAAGAATTCTCCTTTTGG	CAAAGAATTCTCCTTTTGGGCT	2509.25	3.678e-38	464.233	3.678e-38
mmu-miR-467b	-1.09631	0.368012	2.4895	2	10402882	+	GTAAGTGCCTGCATGTATATG	GTAAGTGCCTGCATGTATATG	81.2	0.285309	74.0667	0.715075
mmu-miR-669d	-1.36389	0.406188	9.07454	2	10390010	+	ACTTGTGTGTGCATGTATATGT	ACTTGTGTGTGCATGTATATGT	1845.25	3.678e-38	1352.93	3.678e-38
mmu-miR-485	2.64805	0.689764	22.4399	12	110973119	+	AGGCTGGCCGTGATGAAT	AGAGGCTGGCCGTGATGAATTC	268.55	3.678e-38	711.133	3.678e-38
mmu-miR-329	-2.6657	0.704014	20.8689	12	110951750	+	ACACACCCAGCTAACCTT	AACACACCCAGCTAACCTTTTT	1395.22	3.678e-38	523.4	3.678e-38
mmu-miR-467e*	-1.63711	0.49152	11.2538	2	10427394	+	ATATACATACACACACCTATAT	ATATACATACACACACCTATAT	178.5	1.50724e-20	109.033	0.164895
mmu-miR-34a	1.15301	0.923456	4.62182	4	149442581	+	GGCAGTGTCTTAGCTGGT	TGGCAGTGTCTTAGCTGGTTGT	5025.15	3.678e-38	5794.07	3.678e-38
mmu-miR-320	1.51916	1.52252	15.1736	14	70843363	+	AAAAGCTGGGTTGAGAGG	AAAAGCTGGGTTGAGAGGGCGA	10405.6	3.678e-38	15807.9	3.678e-38
mmu-miR-223	-1.32947	1.27176	11.153	X	93438222	+	TGTCAGTTTGTCAAATACCC	TGTCAGTTTGTCAAATACCCCA	16119.8	3.678e-38	12124.9	3.678e-38
mmu-miR-488	1.67855	0.420904	16.7594	1	160435819	+	TTGAAAGGCTGTTTCTTG	TTGAAAGGCTGTTTCTTGGTC	71.55	0.589092	120.1	0.107111
mmu-miR-466f-3p	1.60038	1.09992	17.3774	2,2,2	1.03904e+23	+,+,+	CATACACACACACATACACAC	CATACACACACACATACACAC	7199.45	3.678e-38	11521.9	3.678e-38
mmu-miR-302d	-2.22443	1.41449	21.8686	3	127248582	+	GTGCTTCCATGTTTGAGTG	TAAGTGCTTCCATGTTTGAGTGT	230.525	7.05962e-31	103.633	0.260308
mmu-miR-669f	1.19345	0.15734	5.25548	2	10388911	+	CATATACATACACACACACGTAT	CATATACATACACACACACGTAT	3054.78	3.678e-38	3645.73	3.678e-38
mmu-miR-128	-1.19288	2.00132	6.38242	9,1	1.12021e+17	-,+	ACAGTGAACCGGTCTCTTT	TCACAGTGAACCGGTCTCTTT	9937.25	3.678e-38	8330.47	3.678e-38
mmu-miR-690	1.41784	0.757395	13.5822	16	28600048	-	AGGCTAGGCTCACAACC	AAAGGCTAGGCTCACAACCAAA	12680.5	3.678e-38	17979	3.678e-38
mmu-miR-764-5p	1.95296	0.664917	21.7634	X	143436827	+	GGTGCTCACATGTCCTC	GGTGCTCACATGTCCTCCT	2055.9	3.678e-38	4015.1	3.678e-38
mmu-miR-675-3p	-1.10956	0.279739	2.78109	7	149763005	-	TGTATGCCCTAACCGCT	CTGTATGCCCTAACCGCTCAGT	79.075	0.320414	71.2667	0.760979
mmu-miR-324-3p	1.01369	0.0709979	0.489921	11	69825596	+	ACTGCCCCAGGTGCTGCT	CCACTGCCCCAGGTGCTGCT	6678.73	3.678e-38	6770.13	3.678e-38
mmu-miR-218	-1.15719	1.3249	5.51835	5,11	4861520435430340	+,+	TTGTGCTTGATCTAACCAT	TTGTGCTTGATCTAACCATGT	10055	3.678e-38	8689.2	3.678e-38
mmu-miR-425	-1.2074	1.24453	7.17674	9	108471119	+	CGATCACTCCCGTTGA	AATGACACGATCACTCCCGTTGA	11353	3.678e-38	9402.8	3.678e-38
mmu-miR-805	1.05194	0.348852	1.80836	MT	16189	-	GAATTGATCAGGACATAG	GAATTGATCAGGACATAGGG	15996.6	3.678e-38	16827.5	3.678e-38
mmu-miR-770-3p	-1.45208	0.196536	8.95792	12	110801953	+	CGTGGGCCTGACGTGGAGCTGG	CGTGGGCCTGACGTGGAGCTGG	521.925	3.678e-38	359.433	1.19655e-29
mmu-miR-346	2.28872	2.34946	28.8101	14	35707809	+	TGTCTGCCCGAGTGCCT	TGTCTGCCCGAGTGCCTGCCTCT	4381.25	3.678e-38	10027.5	3.678e-38
mmu-miR-761	5.59821	1.40303	50.3798	4	108690273	+	CAGGGTGAAACTGACAC	GCAGCAGGGTGAAACTGACACA	852.475	3.678e-38	4772.33	3.678e-38
mmu-miR-92a	1.61505	1.66248	17.1162	14,X	1.15444e+16	+,-	TATTGCACTTGTCCCGGC	TATTGCACTTGTCCCGGCCTG	8304.08	3.678e-38	13411.5	3.678e-38
mmu-miR-338-3p	-1.93446	0.888394	21.4111	11	119876117	-	CAGCATCAGTGATTTTGTT	TCCAGCATCAGTGATTTTGTTG	6927.25	3.678e-38	3580.97	3.678e-38
mmu-let-7d*	1.21953	0.944457	7.43852	13	48631415	-	TATACGACCTGCTGCCTT	CTATACGACCTGCTGCCTTTCT	13794.6	3.678e-38	16823	3.678e-38
mmu-miR-187	-2.79893	1.50776	26.8118	18	24587633	-	TCGTGTCTTGTGTTGCAG	TCGTGTCTTGTGTTGCAGCCGG	2424.9	3.678e-38	866.367	3.678e-38
mmu-miR-532-5p	-1.3463	0.566961	9.54092	X	6825604	-	CATGCCTTGAGTGTAGGAC	CATGCCTTGAGTGTAGGACCGT	3299.2	3.678e-38	2450.57	3.678e-38
solexa-3024-155	1.25551	0.757996	7.77323	0	0	+	TTTCAGTGGAGTGAAGCTC	GATTTCAGTGGAGTGAAGCTCA	164.475	7.10822e-12	206.5	9.0676e-08
mmu-miR-294*	1.15844	0.0576437	2.73904	7	3220655	+	TCAAAATGGAGGCCCTA	ACTCAAAATGGAGGCCCTATCT	314.475	3.678e-38	364.3	3.678e-38
mmu-miR-328	1.35065	0.734486	11.3009	8	107832301	-	CTGGCCCTCTCTGCCCTT	CTGGCCCTCTCTGCCCTTCCGT	10128.6	3.678e-38	13680.3	3.678e-38
mmu-miR-29b*	5.25742	3.14233	37.9893	6	31013089	-	GCTGGTTTCATATGGTGG	GCTGGTTTCATATGGTGGTTTA	283.675	3.678e-38	1491.4	3.678e-38
mmu-miR-744*	1.02864	0.0279449	0.743026	11	65548266	-	TTGCCACTAACCTCAACC	CTGTTGCCACTAACCTCAACCT	946.3	3.678e-38	973.4	3.678e-38
mmu-miR-540-5p	-1.13553	0.851945	3.22291	12	110824294	+	AAGGGTCACCCTCTGACT	CAAGGGTCACCCTCTGACTCTGT	62	0.85886	54.6	0.926792
mmu-miR-700	-1.07931	0.133273	2.24047	4	134972497	-	ACGCGGGAACCGAGTCC	CACGCGGGAACCGAGTCCACC	1477.33	3.678e-38	1368.77	3.678e-38
solexa-27-9416	-1.45386	0.321941	11.4482	0	0	+	GGTCTAGTGGTTAGGATTCG	TCCCTGGTGGTCTAGTGGTTAGGATTCGGC	5399.93	3.678e-38	3714.2	3.678e-38
mmu-miR-137	-3.47544	0.74561	23.7394	3	118136818	+	TATTGCTTAAGAATACGCG	TTATTGCTTAAGAATACGCGTAG	1674.7	3.678e-38	481.867	3.678e-38
mmu-miR-411	-4.23569	1.1219	31.1149	12	110948399	+	TAGTAGACCGTATAGCGTACG	TAGTAGACCGTATAGCGTACG	2491.15	3.678e-38	588.133	3.678e-38
mmu-miR-330	-2.22886	0.621143	16.6118	7	19766834	+	GGGCCTGTGTCTTAGGC	TCTCTGGGCCTGTGTCTTAGGC	1887.33	3.678e-38	846.767	3.678e-38
mmu-miR-149	-1.22476	2.20051	7.6416	1	94746957	+	TCTGGCTCCGTGTCTTCA	TCTGGCTCCGTGTCTTCACTCCC	15372.5	3.678e-38	12551.4	3.678e-38
mmu-miR-129-5p	2.67673	0.45758	23.6476	6,2	2897262394081590	+,-	TTTTTGCGGTCTGGGCTT	CTTTTTGCGGTCTGGGCTTGC	377.55	3.678e-38	1010.6	3.678e-38
mmu-miR-191*	-2.61414	1.50174	26.1315	9	108470697	+	CTGCACTTGGATTTCGTT	GCTGCACTTGGATTTCGTTCCC	1308.72	3.678e-38	500.633	3.678e-38
mmu-miR-384-3p	-4.1388	1.27191	32.2253	X	102539653	-	ATTCCTAGAAATTGTTCACA	ATTCCTAGAAATTGTTCACAAT	382.425	3.678e-38	92.4	0.40843
mmu-miR-742*	2.96706	2.13508	35.8892	X	64033608	-	TACTCACATGGTTGCTAATCA	TACTCACATGGTTGCTAATCA	1696.45	3.678e-38	5033.47	3.678e-38
mmu-miR-185	-1.03267	0.181039	1.20405	16	18327553	-	TGGAGAGAAAGGCAGTTC	TGGAGAGAAAGGCAGTTCCTGA	9297.92	3.678e-38	9003.8	3.678e-38
mmu-miR-874	-3.17785	0.995376	24.1228	13	58124518	-	CCCTGGCCCGAGGGAC	CTGCCCTGGCCCGAGGGACCGA	594.575	3.678e-38	187.1	1.14711e-08
mmu-miR-150	-1.0664	1.0284	2.42773	7	52377131	+	TCTCCCAACCCTTGTACC	TCTCCCAACCCTTGTACCAGTG	17775.4	3.678e-38	16668.7	3.678e-38
mmu-miR-29c*	-4.65244	2.78935	37.3523	1	196863755	+	ACCGATTTCTCCTGGTG	TGACCGATTTCTCCTGGTGTTC	1381	3.678e-38	296.833	3.19308e-22
mmu-miR-151-3p	1.42619	1.17707	13.9521	15	73085271	-	CTAGACTGAGGCTCCTTGA	CTAGACTGAGGCTCCTTGAGG	8410.62	3.678e-38	11995.2	3.678e-38
mmu-miR-340-3p	-1.48958	0.592923	12.0452	11	49883263	+	CCGTCTCAGTTACTTTATAGC	TCCGTCTCAGTTACTTTATAGC	5230.15	3.678e-38	3511.17	3.678e-38
mmu-miR-470	1.11985	0.158461	2.90957	X	64067193	-	TTCTTGGACTGGCACTG	TTCTTGGACTGGCACTGGTGAGT	100.4	0.0234645	112.433	0.0483622
solexa-3253-144	1.67545	0.852352	17.5779	0	0	+	GGCTGGAGAGATGGCT	GGGCTGGAGAGATGGCTCAGCCGTT	4132.73	3.678e-38	6924.17	3.678e-38
mmu-miR-466a-3p,mmu-miR-466b-3p,mmu-miR-466c-3p,mmu-miR-466e-3p,mmu-miR-466a-3p,mmu-miR-466b-3p,mmu-miR-466c-3p,mmu-miR-466e-3p,mmu-miR-466b-3-3p,mmu-miR-466a-3p,mmu-miR-466b-3p,mmu-miR-466c-3p,mmu-miR-466e-3p,mmu-miR-466a-3p,mmu-miR-466b-3p,mmu-miR-466c-3p,mmu-miR-466e-3p	1.46586	1.01412	12.9296	2,2,2,2,2,2,2,2,2,2,2,2,2,2,2,2,2,2,2,2,2	1.04296e+167	+,+,+,+,+,+,+,+,+,+,+,+,+,+,+,+,+,+,+,+,+	TACATACACGCACACATAAGA	TATACATACACGCACACATAAGA,TATACATACACGCACACATAAGA,TATACATACACGCACACATAAGA,TATACATACACGCACACATAAGA,TATACATACACGCACACATAAGA,TATACATACACGCACACATAAGA,TATACATACACGCACACATAAGA,TATACATACACGCACACATAAGA,AATACATACACGCACACATAAGA,TATACATACACGCACACATAAGA,TATACATACACGCACACATAAGA,TATACATACACGCACACATAAGA,TATACATACACGCACACATAAGA,TATACATACACGCACACATAAGA,TATACATACACGCACACATAAGA,TATACATACACGCACACATAAGA,TATACATACACGCAC…	4113.6	3.678e-38	6029.97	3.678e-38
mmu-miR-503*	-3.85657	1.54216	31.8324	X	50407186	-	GTATTGTTTCCACTGCCTG	GAGTATTGTTTCCACTGCCTGG	3546.38	3.678e-38	919.567	3.678e-38
mmu-miR-450a-5p	-3.30443	1.9703	33.955	X,X	5040140550401530	-,-	TTTTGCGATGTGTTCCTA	TTTTGCGATGTGTTCCTAATAT	8385.42	3.678e-38	2537.63	3.678e-38
mmu-miR-433*	1.75092	0.477828	17.8781	12	110829938	+	ACGGTGAGCCTGTCATTA	TACGGTGAGCCTGTCATTATTC	113.35	0.00144911	198.467	3.95968e-05
mmu-miR-128a:9.1	-1.3093	2.22959	7.78433	0	0	+	CAGTGAACCGGTCTCTTTC	TCACAGTGAACCGGTCTCTTTC	4453.32	3.678e-38	3401.3	3.678e-38
mmu-miR-434-5p	1.09684	0.252438	2.64872	12	110832737	+	CTCGACTCATGGTTTGAA	GCTCGACTCATGGTTTGAACCA	1718.55	3.678e-38	1884.97	3.678e-38
mmu-let-7c-2*,mmu-let-7a*	-2.4443	1.37771	26.1705	15,13	8553709348633570	+,-	CTATACAATCTACTGTCTTTCC	CTATACAATCTACTGTCTTTCC,CTATACAATCTACTGTCTTTCC	6712.38	3.678e-38	2746.13	3.678e-38
mmu-miR-29b	-1.45093	0.801831	12.9538	6,1	3.1013e+16	-,+	TAGCACCATTTGAAATCAG	TAGCACCATTTGAAATCAGTGTT	16440.7	3.678e-38	11331.1	3.678e-38
mmu-miR-455*	-1.36318	0.287949	7.74217	4	62917900	+	TATGTGCCTTTGGACTACA	TATGTGCCTTTGGACTACATCG	479.475	3.678e-38	351.733	8.945e-34
mmu-let-7c-1*	-1.70117	0.92381	13.9878	16	77599961	+	CTGTACAACCTTCTAGC	CTGTACAACCTTCTAGCTTTCC	135.3	4.38826e-06	79.5333	0.580333
solexa-110-3896	1.4002	0.342119	10.7963	0	0	+	TGTGGCTGGACATCTGT	AGAATTGTGGCTGGACATCTGT	214.35	9.46598e-22	300.133	8.14252e-22
mmu-miR-878-5p	1.12317	0.647481	3.81627	X	64054751	-	TATCTAGTTGGATGTCAAGACA	TATCTAGTTGGATGTCAAGACA	150.675	3.33662e-09	169.233	0.000145393
mmu-miR-877*	1.59861	0.630397	15.371	17	36097698	-	CTTCTCCCTCCTCCCA	TGTCCTCTTCTCCCTCCTCCCA	2043.17	3.678e-38	3266.23	3.678e-38
mmu-miR-425*	1.06326	0.0346326	1.75037	9	108471160	+	ATCGGGAATGTCGTGTCC	ATCGGGAATGTCGTGTCCGCC	1455.92	3.678e-38	1548.03	3.678e-38
mmu-miR-382	2.34774	0.665115	24.4366	12	110971990	+	AAGTTGTTCGTGGTGGAT	GAAGTTGTTCGTGGTGGATTCG	1106.83	3.678e-38	2598.53	3.678e-38
mmu-miR-26b*	-1.64888	0.688468	12.9254	1	74440933	+	CTGTTCTCCATTACTTGGCT	CCTGTTCTCCATTACTTGGCTC	2971.72	3.678e-38	1802.27	3.678e-38
mmu-miR-200b*	1.58683	1.13456	17.144	4	155429852	-	CATCTTACTGGGCAGCAT	CATCTTACTGGGCAGCATTGGA	220.65	1.47194e-30	350.133	1.22491e-28
mmu-miR-615-5p	-1.34283	0.905271	8.99533	15	102845356	+	TCCCCGGTGCTCGGAT	GGGGGTCCCCGGTGCTCGGATC	177.925	8.76548e-16	132.5	0.028965
mmu-miR-203	-2.00345	1.44609	21.9469	12	113369137	+	TGAAATGTTTAGGACCACTAG	GTGAAATGTTTAGGACCACTAG	9268.85	3.678e-38	4626.43	3.678e-38
solexa-284-1594	1.38884	0.709144	11.3398	0	0	+	CTCGTTGGTCTAGGGGTAT	GGCTCGTTGGTCTAGGGGTATGATTC	4976.95	3.678e-38	6912.17	3.678e-38
mmu-miR-30e*	-1.17072	2.49403	5.8705	4	120445245	-	CTTTCAGTCGGATGTTTACA	CTTTCAGTCGGATGTTTACAGC	18519.5	3.678e-38	15818.9	3.678e-38
mmu-miR-671-3p	1.48378	1.29345	11.1744	5	24097988	+	GGTTCTCAGGGCTCCA	TCCGGTTCTCAGGGCTCCACC	1367.9	3.678e-38	2029.67	3.678e-38
mmu-miR-181d	1.77892	0.355896	10.6375	8	86702681	-	AACATTCATTGTTGTCG	AACATTCATTGTTGTCGGTGGGT	145.875	2.03179e-10	259.5	4.41078e-26
mmu-miR-376b*	-1.73293	0.600831	15.6328	12	110961680	+	GTGGATATTCCTTCTATGGTT	GTGGATATTCCTTCTATGGTTA	3832.78	3.678e-38	2211.73	3.678e-38
mmu-miR-103	-1.20568	1.59696	7.49511	11,2	3.55959e+16	+,+	AGCATTGTACAGGGCTATG	AGCAGCATTGTACAGGGCTATGA	20842.3	3.678e-38	17286.7	3.678e-38
mmu-miR-466f	1.38609	0.793406	9.84734	13	71245985	+	ACGTGTGTGTGCATGTGCATGT	ACGTGTGTGTGCATGTGCATGT	594.5	3.678e-38	824.033	3.678e-38
mmu-miR-483	-2.86383	1.28903	26.6365	7	149840895	-	AGACGGGAGAAGAGAAGG	AAGACGGGAGAAGAGAAGGGAG	170.875	1.62772e-11	59.6667	0.887808
mmu-miR-210	1.19163	0.8905	5.83977	7	148407328	-	CTGTGCGTGTGACAGCGG	CTGTGCGTGTGACAGCGGCTGA	3853.32	3.678e-38	4591.73	3.678e-38
mmu-miR-30c-1*	-1.0533	0.129827	1.16124	4	120442173	-	TGGGAGAGGGTTGTTTACTCC	CTGGGAGAGGGTTGTTTACTCC	2130.55	3.678e-38	2022.73	3.678e-38
mmu-miR-194	1.01383	0.0494767	0.396401	19,1	6264657187137200	+,+	GTAACAGCAACTCCATGTG	TGTAACAGCAACTCCATGTGGA	2319.25	3.678e-38	2351.33	3.678e-38
mmu-miR-1198	1.62861	1.4314	15.8414	X	7384267	+	GTGTTCCTGGCTGGCT	TATGTGTTCCTGGCTGGCTTGG	1859.15	3.678e-38	3027.83	3.678e-38
mmu-miR-92a*	1.75512	0.804988	21.3482	X	50095091	-	GGGATTGGTGGCATTAC	AGGTGGGGATTGGTGGCATTAC	251.625	3.678e-38	441.633	3.678e-38
mmu-miR-181b	1.09354	0.563787	3.46246	2,1	3.87094e+16	+,+	ATTCATTGCTGTCGGTGG	AACATTCATTGCTGTCGGTGGGT	14345.8	3.678e-38	15687.8	3.678e-38
mmu-miR-136	-3.5433	1.5921	29.5109	12	110833540	+	ACTCCATTTGTTTTGATGAT	ACTCCATTTGTTTTGATGATGG	2606.45	3.678e-38	735.6	3.678e-38
mmu-miR-763	2.24129	0.509904	23.2747	10	119885130	-	AGCTGGGAAGAACCAGT	CCAGCTGGGAAGAACCAGTGGC	1164.55	3.678e-38	2610.1	3.678e-38
mmu-miR-193*	1.27969	0.977051	7.7385	11	79525476	+	TCTTTGCGGGCAAGAT	TGGGTCTTTGCGGGCAAGATGA	4162.25	3.678e-38	5326.4	3.678e-38
mmu-miR-341	2.87597	0.573295	30.3389	12	110849765	+	TCGATCGGTCGGTCGG	TCGGTCGATCGGTCGGTCGGT	82.975	0.361692	238.633	2.506e-11
mmu-miR-466g	1.94777	1.71577	20.3954	2	10436268	+	ATACAGACACATGCACACAC	ATACAGACACATGCACACACA	1800.58	3.678e-38	3507.1	3.678e-38
mmu-miR-713	-1.18508	0.649727	4.44074	13	62862166	+	TGCACTGAAGGCACACA	TGCACTGAAGGCACACAGC	93.7	0.0780431	79.0667	0.642622
mmu-miR-181a-2*	2.06627	0.576374	21.7388	2	38708307	+	CGACCGTTGACTGTACCT	ACCGACCGTTGACTGTACCTTG	1343.95	3.678e-38	2776.97	3.678e-38
mmu-miR-466i	1.38176	0.950073	11.3033	13	17839385	+	ATACACACACACATACACACTA	ATACACACACACATACACACTA	7174.12	3.678e-38	9912.93	3.678e-38
mmu-miR-488*	-1.00385	0.0209469	0.131314	1	160435781	+	CCCAGATAATAGCACTCTCA	CCCAGATAATAGCACTCTCAA	147.6	8.51914e-09	147.033	0.00380803
solexa-783-586	-1.98219	0.765971	15.0838	0	0	+	GTGCAGTGCTGCATCTC	GGTGCAGTGCTGCATCTCTGG	291.25	3.678e-38	146.933	1.67029e-05
mmu-miR-466d-3p	-1.22732	0.423177	5.97439	2	10433643	+	TATACATACACGCACACATAG	TATACATACACGCACACATAG	2979.22	3.678e-38	2427.43	3.678e-38
mmu-miR-411*	-1.46451	0.564501	9.66181	12	110948434	+	GTAACACGGTCCACTAACC	TATGTAACACGGTCCACTAACC	93.875	0.080893	64.1	0.846894
mmu-miR-760	2.82334	0.728417	33.3535	3	121996553	-	CGGCTCTGGGTCTGTGGGGA	CGGCTCTGGGTCTGTGGGGA	234.25	2.44144e-33	661.367	3.678e-38
mmu-miR-33	-1.11281	0.109354	2.61115	15	82028556	+	GTGCATTGTAGTTGCATTG	GTGCATTGTAGTTGCATTGCA	174.6	1.32689e-15	156.9	2.10634e-05
mmu-miR-669a	1.04333	0.0407538	1.31263	2,2,2	1.04318e+23	+,+,+	GTTGTGTGTGCATGTTCA	AGTTGTGTGTGCATGTTCATGT	1287.8	3.678e-38	1343.6	3.678e-38
mmu-miR-542-5p	-1.5459	0.962358	11.3105	X	50402652	-	TCGGGGATCATCATGTC	CTCGGGGATCATCATGTCACGA	106.1	0.00371393	68.6333	0.758794
mmu-miR-466f-5p	1.43685	0.390177	13.2281	2,2,2	1.03936e+23	+,+,+	TACGTGTGTGTGCATGTGC	TACGTGTGTGTGCATGTGCATG	310.725	3.678e-38	446.467	3.678e-38
mmu-miR-291b-3p	1.84286	0.549872	24.8304	7	3219529	+	AAGTGCATCCATTTTGTTT	AAAGTGCATCCATTTTGTTTGT	186.775	2.87532e-16	344.2	7.81709e-22
mmu-miR-362-5p	-2.71482	1.63527	22.5037	X	6819169	-	ATCCTTGGAACCTAGGTG	AATCCTTGGAACCTAGGTGTGAAT	511.2	3.678e-38	188.3	6.94765e-08
solexa-1127-427	-1.35762	1.62754	10.8193	0	0	+	AGAATTCTCGCCTGCC	TAGAATTCTCGCCTGCCAC	8540.8	3.678e-38	6291	3.678e-38
mmu-miR-485*	-2.10925	1.57939	19.8508	12	110973155	+	GTCATACACGGCTCTCCT	AGTCATACACGGCTCTCCTCTC	188.075	1.57306e-21	89.1667	0.456678
mmu-miR-190	-2.44343	1.37203	26.5392	9	67084529	-	TGATATGTTTGATATATTAGGT	TGATATGTTTGATATATTAGGT	6630.82	3.678e-38	2713.73	3.678e-38
solexa-308-1456	-2.88649	2.51782	28.7309	0	0	+	CCCGGCTAGCTCAGTC	GCCCGGCTAGCTCAGTCGGTAGA	2370.68	3.678e-38	821.3	3.678e-38
mmu-miR-421	-1.65021	0.365899	12.6538	X	100768292	-	ACAGACATTAATTGGGCG	ATCAACAGACATTAATTGGGCGC	1891.75	3.678e-38	1146.37	3.678e-38
mmu-miR-9	1.05019	0.186177	1.77908	7,3,13	8.66502e+23	+,+,+	TCTTTGGTTATCTAGCTGTATG	TCTTTGGTTATCTAGCTGTATGA	7190.8	3.678e-38	7551.73	3.678e-38
mmu-miR-452	-2.14527	1.248	19.4516	X	69507632	-	GTTTGCAGAGGAAACTGA	TGTTTGCAGAGGAAACTGAGAC	225.325	1.28858e-35	105.033	0.101173
mmu-miR-338-5p	1.13284	0.234394	3.80719	11	119876152	-	ACAATATCCTGGTGCTGAGT	AACAATATCCTGGTGCTGAGTG	2846.45	3.678e-38	3224.57	3.678e-38
mmu-miR-705	6.41538	1.08088	48.1383	6	85286355	-	GTGGGAGGTGGGGTGG	GGTGGGAGGTGGGGTGGGCA	136.5	4.61128e-07	875.7	3.678e-38
mmu-miR-503	1.07577	0.210394	2.26019	X	50407227	-	AGCAGCGGGAACAGTAC	TAGCAGCGGGAACAGTACTGCAG	2763.35	3.678e-38	2972.73	3.678e-38
mmu-miR-107	-2.21626	1.41012	22.2751	19	34895213	-	AGCATTGTACAGGGCTATC	AGCAGCATTGTACAGGGCTATCA	4880.57	3.678e-38	2202.17	3.678e-38
mmu-miR-295*	4.57063	0.815751	37.6634	7	3220779	+	AAATGTGGGGCACACTT	ACTCAAATGTGGGGCACACTTC	645.95	3.678e-38	2952.4	3.678e-38
mmu-miR-681	2.69216	0.589974	29.9908	12	70864931	-	AGCCTCGCTGGCAGGCA	CAGCCTCGCTGGCAGGCAGCT	120.3	0.00109705	323.867	6.62806e-22
mmu-miR-467e	-1.8988	0.792069	16.2265	2	10427357	+	ATAAGTGTGAGCATGTATATGT	ATAAGTGTGAGCATGTATATGT	3125.68	3.678e-38	1646.13	3.678e-38
mmu-miR-297b-5p	1.03908	0.0708219	1.10348	2	10433312	+	ATGTATGTGTGCATGAACAT	ATGTATGTGTGCATGAACATGT	117.7	0.000691853	122.3	0.0303648
mmu-miR-129-3p	-4.86288	1.4472	29.3603	2	94081555	-	AAGCCCTTACCCCAAAAA	AAGCCCTTACCCCAAAAAGCAT	551.775	3.678e-38	113.467	0.0161962
mmu-miR-743b-3p	1.19997	0.253947	5.75941	X	64030463	-	GAAAGACATCATGCTGAATA	GAAAGACATCATGCTGAATAGA	109.975	0.00452153	131.967	0.0532159
mmu-miR-188-5p	-2.12108	1.21816	19.1556	X	6825178	-	ATCCCTTGCATGGTGGAG	CATCCCTTGCATGGTGGAGGG	787.275	3.678e-38	371.167	3.678e-38
mmu-miR-335-5p	-3.04783	1.55033	27.414	6	30691313	+	TCAAGAGCAATAACGAAAA	TCAAGAGCAATAACGAAAAATGT	3646.43	3.678e-38	1196.4	3.678e-38
mmu-miR-543	-2.03628	0.744076	17.711	12	110955513	+	AACATTCGCGGTGCACT	AAACATTCGCGGTGCACTTCTT	129.1	0.000457558	63.4	0.856045
mmu-miR-696	-1.50233	0.304273	10.6736	0	0	+	GCGTGTGCTTGCTGTGG	GCGTGTGCTTGCTGTGGG	451	3.678e-38	300.2	1.85044e-23
mmu-miR-715	2.76386	1.38465	22.9712	17	39981094	+	TCCGTGCACACCCCCG	CTCCGTGCACACCCCCGCGTG	370.05	3.678e-38	1022.77	3.678e-38
mmu-miR-208b	1.30418	0.375789	7.84161	14	55594569	-	ATAAGACGAACAAAAG	ATAAGACGAACAAAAGGTTTGT	149.775	2.48419e-09	195.333	5.59746e-06
mmu-miR-801:9.1	-1.88128	0.909275	17.1667	0	0	+	GATTGCTGTGCGTGCGGAATCGAC	GATTGCTGTGCGTGCGGAATCGAC	243.375	3.678e-38	129.367	0.0342535
mmu-miR-743a	-1.0976	0.202312	2.57547	X	64029957	-	AGACACCAAGCTGAGTA	GAAAGACACCAAGCTGAGTAGA	98.125	0.0353123	89.4	0.491174
mmu-miR-138	1.49604	0.215044	12.1739	9,8	1.22592e+16	+,+	AGCTGGTGTTGTGAATC	AGCTGGTGTTGTGAATCAGGCCG	361.6	3.678e-38	540.967	3.678e-38
solexa-2011-236	-1.59735	0.458552	11.0354	0	0	+	TCAGCAAGTATACTGCCCTA	AATCAGCAAGTATACTGCCCTA	1321.65	3.678e-38	827.4	3.678e-38
solexa-403-1161	1.11775	0.325246	3.82907	0	0	+	CTACGGCCATACCACC	GTCTACGGCCATACCACCCTGA	3175.4	3.678e-38	3549.3	3.678e-38
mmu-miR-200c	1.32306	0.459706	9.28488	6	124668365	-	ACTGCCGGGTAATGATGG	TAATACTGCCGGGTAATGATGGA	2648.47	3.678e-38	3504.1	3.678e-38
mmu-miR-669c	1.43333	0.410339	10.4907	2	10430945	+	AGTTGTGTGTGGATGTGTG	ATAGTTGTGTGTGGATGTGTGT	1310.1	3.678e-38	1877.8	3.678e-38
mmu-miR-211	1.2342	0.295965	6.86551	7	71350716	+	TCCCTTTGTCATCCTTTG	TTCCCTTTGTCATCCTTTGCCT	327.85	3.678e-38	404.633	3.678e-38
mmu-miR-342-5p	1.5797	1.14983	15.8383	12	109896847	+	GGGTGCTATCTGTGATTGA	AGGGGTGCTATCTGTGATTGAG	3562.38	3.678e-38	5627.47	3.678e-38
mmu-miR-295	-1.35018	0.544949	8.64436	7	3220815	+	AAAGTGCTACTACTTTTGAGTCT	AAAGTGCTACTACTTTTGAGTCT	150.95	1.61561e-10	111.8	0.0926603
mmu-miR-470*	-1.05749	0.055164	1.95681	X	64067158	-	AACCAGTACCTTTCTGAGAAG	AACCAGTACCTTTCTGAGAAGA	299.975	3.678e-38	283.667	4.81485e-16
mmu-miR-341:9.1	1.15743	0.283917	4.58721	0	0	+	GATCGGTCGGTCGGTCA	TCGATCGGTCGGTCGGTCAGT	311.15	3.678e-38	360.133	3.678e-38
mmu-miR-135a	-5.35074	3.40139	46.3573	10,9	9.15349e+16	-,+	TATGGCTTTTTATTCCTATG	TATGGCTTTTTATTCCTATGTGA	7519.93	3.678e-38	1405.4	3.678e-38
mmu-miR-467h	1.18643	0.199638	5.11207	9	115291015	+	ATAAGTGTGTGCATGTATATGT	ATAAGTGTGTGCATGTATATGT	441.575	3.678e-38	523.9	3.678e-38
mmu-miR-719	5.59416	1.16805	41.744	14	60847732	-	TCTCGGCTACAGAAAAATG	ATCTCGGCTACAGAAAAATGTT	529.475	3.678e-38	2961.97	3.678e-38
mmu-miR-670	-1.03011	0.0321632	0.77606	2	94101537	-	CCCTGAGTGTATGTGGTG	ATCCCTGAGTGTATGTGGTGAA	166.225	2.74128e-13	161.367	0.00142962
mmu-miR-297c	-2.05574	0.44169	14.5906	2	10430652	+	TGTATGTGTGCATGTAC	ATGTATGTGTGCATGTACATGT	448.425	3.678e-38	218.133	1.86082e-18
mmu-miR-183	3.33868	0.761094	34.407	6	30119733	-	ATGGCACTGGTAGAATTCA	TATGGCACTGGTAGAATTCACT	240.175	3.678e-38	801.867	3.678e-38
mmu-miR-496	-2.88677	0.656187	22.5359	12	110977374	+	ATTACATGGCCAATCTC	TGAGTATTACATGGCCAATCTC	226.9	3.83742e-25	78.6	0.661679
mmu-miR-759	1.21135	0.0816868	4.73296	14	80138266	+	CAGAGTGCAAACAATTT	GCAGAGTGCAAACAATTTTGAC	496.775	3.678e-38	601.767	3.678e-38
mmu-miR-154*	-1.71079	0.921759	14.0241	12	110976683	+	AATCATACACGGTTGACCTAT	AATCATACACGGTTGACCTATT	123.975	1.73292e-05	72.4667	0.742392
solexa-4153-111	1.89765	0.330245	13.6103	0	0	+	GACCTCGTGGCGCAAT	GACCTCGTGGCGCAATGG	510.65	3.678e-38	969.033	3.678e-38
mmu-miR-382*	-3.01993	0.747924	25.8072	12	110972028	+	CATTCACGGACAACACTTT	TCATTCACGGACAACACTTTTT	693.275	3.678e-38	229.567	2.50287e-11
mmu-miR-381	-2.90183	0.901045	22.6387	12	110965079	+	TATACAAGGGCAAGCTCTC	TATACAAGGGCAAGCTCTCTGT	254.2	5.70601e-38	87.6	0.372581
mmu-miR-685	1.54341	0.357289	13.5441	14	51427187	-	TCAATGGCTGAGGTGAG	TCAATGGCTGAGGTGAGGCAC	2011.62	3.678e-38	3104.77	3.678e-38
mmu-miR-541	1.35929	0.64033	8.7191	12	110980631	+	AGGGATTCTGATGTTGGT	AAGGGATTCTGATGTTGGTCACACT	994	3.678e-38	1351.13	3.678e-38
mmu-miR-154	1.35896	0.240837	9.16867	12	110976647	+	TAGGTTATCCGTGTTGCCT	TAGGTTATCCGTGTTGCCTTCG	2785.3	3.678e-38	3785.1	3.678e-38
solexa-2307-205	-1.78398	1.46155	17.6603	0	0	+	TTGTACATGGTAGGCTTTCA	TTGTACATGGTAGGCTTTCATT	224.9	1.07383e-29	126.067	0.0437311
mmu-miR-181a-1*	-4.64592	1.66805	29.8424	1	139863084	+	CATCGACCGTTGATTGTA	ACCATCGACCGTTGATTGTACC	1559.33	3.678e-38	335.633	3.678e-38
mmu-miR-375	1.41651	0.239803	10.2872	1	74947257	-	TTTGTTCGTTCGGCTCGC	TTTGTTCGTTCGGCTCGCGTGA	460.875	3.678e-38	652.833	3.678e-38
solexa-622-718	1.39881	0.485881	11.3455	0	0	+	GGGGATGTAGCTCAGTGGT	GGGGATGTAGCTCAGTGGTAGA	3925.53	3.678e-38	5491.07	3.678e-38
mmu-miR-345-3p	-1.28943	1.25357	7.80946	12	110075236	+	CTGAACTAGGGGTCTGGAG	CCTGAACTAGGGGTCTGGAGAC	5329.5	3.678e-38	4133.23	3.678e-38
solexa-4983-92	5.55096	1.33334	46.4657	0	0	+	ATACAAGGATAATTTCTTTT	CATACAAGGATAATTTCTTTTT	571.775	3.678e-38	3173.9	3.678e-38
solexa-1416-339_2	1.06876	0.0544512	1.95114	0	0	+	AGGTCACGTCTCTGCAGT	CAGGTCACGTCTCTGCAGTTAC	172.225	3.75984e-15	184.067	0.000130632
mmu-miR-669i	-1.73412	0.431338	13.1842	2	10439297	+	TGCATATACACACATGCATAC	TGCATATACACACATGCATAC	170.175	5.56385e-15	98.1333	0.100377
solexa-1278-371	1.04419	0.0416582	1.1525	0	0	+	GTAAAGGCTGGGCTTAGAC	GTAAAGGCTGGGCTTAGACGTGG	848.025	3.678e-38	885.5	3.678e-38
mmu-miR-1194	-1.27803	0.320389	6.4616	0	0	+	GAATGAGTAACTGCTAGATCCT	GAATGAGTAACTGCTAGATCCT	139.05	2.92941e-08	108.8	0.139168
mmu-miR-483*	1.41796	0.33001	9.98629	7	149840858	-	TCCTCCCCTCCCGTCTT	TCACTCCTCCCCTCCCGTCTT	283.2	3.678e-38	401.567	3.678e-38
mmu-miR-466h	1.3415	0.839011	8.70413	2	10436527	+	TGTGTGCATGTGCTTGTGTGT	TGTGTGCATGTGCTTGTGTGTA	1106.38	3.678e-38	1484.2	3.678e-38
mmu-miR-1199	-1.02511	0.0224981	0.852268	8	86535513	-	TCTGAGTCCCGGTCGC	TCTGAGTCCCGGTCGCGCGG	302.1	3.678e-38	294.7	6.82058e-18
mmu-miR-501-3p	-1.42367	0.529272	9.32496	X	6818418	-	TGCACCCGGGCAAGGAT	AATGCACCCGGGCAAGGATTTG	622	3.678e-38	436.9	3.678e-38
mmu-miR-10b*	-1.68314	0.609132	14.8626	2	74564170	+	AGATTCGATTCTAGGG	CAGATTCGATTCTAGGGGAATA	393.575	3.678e-38	233.833	2.38578e-10
mmu-miR-325*	-2.33551	0.521393	17.6253	X	102574504	-	CCTAGTAGGTGCTCAGTAAGTG	CCTAGTAGGTGCTCAGTAAGTGT	161.15	1.56387e-16	69	0.793832
mmu-miR-9*	-3.61209	1.62649	32.4932	3,7,13	8.80196e+23	+,+,+	TAAAGCTAGATAACCGAAAGT	ATAAAGCTAGATAACCGAAAGT	3368.28	3.678e-38	932.5	3.678e-38
mmu-miR-466d-5p	-2.06576	0.661922	17.5381	2	10433603	+	GTGTGTGCGTACATGTA	TGTGTGTGCGTACATGTACATG	174.075	2.82805e-19	84.2667	0.546384
mmu-miR-881	-1.9078	0.581055	15.0797	X	64055151	-	AACTGTGTCTTTTCTGAATA	AACTGTGTCTTTTCTGAATAGA	215.2	1.21597e-35	112.8	0.159424
mmu-miR-34b-5p	-3.072	0.931278	25.1229	9	50911738	-	AGGCAGTGTAATTAGCTGAT	AGGCAGTGTAATTAGCTGATTGT	378.675	3.678e-38	123.267	0.0623382
mmu-miR-873	-1.3183	0.275796	7.63113	4	36615610	-	CAGGAACTTGTGAGTCTCCT	GCAGGAACTTGTGAGTCTCCT	654.625	3.678e-38	496.567	3.678e-38
mmu-miR-410	1.31334	0.175933	6.12035	12	110981973	+	AATATAACACAGATGGCCTG	AATATAACACAGATGGCCTGT	313.475	3.678e-38	411.7	3.678e-38
mmu-miR-883b-3p	1.10753	0.109626	3.17364	X	64043097	-	TAACTGCAACATCTCT	TAACTGCAACATCTCTCAGTAT	156.775	2.70945e-10	173.633	0.000171713
mmu-miR-875-5p	-4.56885	0.925624	26.8048	15	35590793	-	TATACCTCAGTTTTATCAGGTG	TATACCTCAGTTTTATCAGGTG	293.625	3.678e-38	64.2667	0.846362
mmu-miR-669e	1.71484	0.294087	12.7864	2	10389163	+	TGTCTTGTGTGTGCATGTTC	TGTCTTGTGTGTGCATGTTCAT	459.5	3.678e-38	787.967	3.678e-38
mmu-miR-34c	-2.49952	0.655437	20.0944	9	50911204	-	AGGCAGTGTAGTTAGCTGAT	AGGCAGTGTAGTTAGCTGATTGC	437.75	3.678e-38	175.133	1.00486e-07
mmu-miR-1-2-as	12.3823	1.04329	54.4776	18	10785483	+	TACATACTTCTTTACATTCCA	TACATACTTCTTTACATTCCA	139.85	1.18987e-05	1731.67	3.678e-38
mmu-miR-466c-5p	1.54963	0.355148	13.267	2	10403171	+	GATGTGTGTGTGCATGTACATA	GATGTGTGTGTGCATGTACATA	2063.2	3.678e-38	3197.2	3.678e-38
mmu-miR-7b	1.00975	0.00987175	0.288679	17	56382439	+	TGGAAGACTTGTGATTTTGT	TGGAAGACTTGTGATTTTGTTGT	476.95	3.678e-38	481.6	3.678e-38
mmu-miR-141*	-1.81476	0.58801	16.1319	6	124667999	-	ATCTTCCAGTGCAGTGTTG	CATCTTCCAGTGCAGTGTTGGA	125.4	0.00130045	69.1	0.787131
mmu-let-7f*	-1.14842	0.0818949	3.81361	13	48633224	-	ATACAATCTATTGCCTTC	CTATACAATCTATTGCCTTCCC	373.85	3.678e-38	325.533	3.08399e-28
mmu-miR-325	-1.40622	0.197037	7.90187	X	102574466	-	TTTATTGAGCACCTCCTATCA	TTTATTGAGCACCTCCTATCAA	422.85	3.678e-38	300.7	3.46371e-32
mmu-miR-877	1.97134	0.889743	20.5324	17	36097760	-	AGAGGAGATGGCGCAG	GTAGAGGAGATGGCGCAGGG	1237.45	3.678e-38	2439.43	3.678e-38
mmu-miR-19a	-2.50826	0.961637	21.7501	14	115443269	+	TGTGCAAATCTATGCAAAAC	TGTGCAAATCTATGCAAAACTGA	688.6	3.678e-38	274.533	4.59151e-18
mmu-miR-125a-3p	1.23626	0.134813	6.91111	17	17967818	+	GTGAGGTTCTTGGGAGCC	ACAGGTGAGGTTCTTGGGAGCC	314.525	3.678e-38	388.833	1.41575e-28
mmu-miR-291b-5p	-1.5755	0.914526	12.3503	7	3219494	+	GATCAAAGTGGAGGCCCT	GATCAAAGTGGAGGCCCTCTCC	157.55	1.82521e-11	100	0.314158
mmu-miR-654-3p	4.06784	1.22366	39.8648	12	110961479	+	GTCTGCTGACCATCACCT	TATGTCTGCTGACCATCACCTT	829.45	3.678e-38	3374.07	3.678e-38
mmu-miR-122	-1.15791	0.106345	3.64514	18	65408519	+	GAGTGTGACAATGGTGTTT	TGGAGTGTGACAATGGTGTTTG	850.025	3.678e-38	734.1	3.678e-38
mmu-miR-671-5p	-1.31604	0.244308	7.31914	5	24097949	+	GAAGCCCTGGAGGGGCT	AGGAAGCCCTGGAGGGGCTGGAG	185.65	2.96557e-13	141.067	0.0131113
mmu-miR-450b-5p	-3.77642	0.868079	25.0027	X	50401243	-	TTTTGCAGTATGTTCCTGA	TTTTGCAGTATGTTCCTGAATA	418.05	3.678e-38	110.7	0.108225
mmu-miR-215	-1.21067	0.201434	6.14607	1	187137488	+	ATGACCTATGATTTGACAGAC	ATGACCTATGATTTGACAGAC	5987.65	3.678e-38	4945.73	3.678e-38
mmu-miR-20b	1.78434	0.410125	15.0787	X	50095359	-	AAAGTGCTCATAGTGCAGG	CAAAGTGCTCATAGTGCAGGTAG	1035.03	3.678e-38	1846.83	3.678e-38
mmu-miR-466k	1.63877	0.2239	11.3057	3	85271317	+	TGTGTGTGTACATGTACATGTGA	TGTGTGTGTACATGTACATGTGA	257.225	3.678e-38	421.533	3.678e-38
mmu-miR-148a*	-1.06693	0.0326413	1.77257	6	51219888	-	AAGTTCTGAGACACTCCGAC	AAAGTTCTGAGACACTCCGACT	234.725	8.55763e-26	220	3.87032e-08
mmu-miR-205	-2.01587	0.7811	16.2299	1	195333719	-	CCTTCATTCCACCGGAGT	TCCTTCATTCCACCGGAGTCTG	154.55	1.2697e-11	76.6667	0.67326
mmu-miR-880	-2.01678	0.490847	13.364	X	64053737	-	TACTCCATCCTCTCTGAGTAGA	TACTCCATCCTCTCTGAGTAGA	114.15	0.000619419	56.6	0.911053
mmu-miR-1187	2.9763	0.989146	30.2658	5	83228012	-	TATGTGTGTGTGTATGTGTGTAA	TATGTGTGTGTGTATGTGTGTAA	929.6	3.678e-38	2766.77	3.678e-38
solexa-2402-197	-1.44089	0.605725	11.213	0	0	+	GCCCGCGTGTTTTTCG	AAGTTGCCCGCGTGTTTTTCG	183.425	9.14742e-16	127.3	0.0568563
mmu-miR-105	-2.1391	0.546007	17.3412	X	69836909	-	CAAGTGCTCAGATGCTTGT	CCAAGTGCTCAGATGCTTGTGGT	197.225	2.5468e-22	92.2	0.373367
mmu-miR-1193	-1.0624	0.0315457	1.09965	12	110953959	+	TAGGTCACCCGTTTTACTATC	TAGGTCACCCGTTTTACTATC	320.525	3.678e-38	301.7	3.678e-38
mmu-miR-409-5p	-1.09608	0.0439638	1.95679	12	110981381	+	GTTACCCGAGCAACTTTG	AGGTTACCCGAGCAACTTTGCAT	1044.28	3.678e-38	952.733	3.678e-38
mmu-miR-409-3p	-2.04019	0.452727	16.1051	12	110981413	+	AATGTTGCTCGGTGAAC	GAATGTTGCTCGGTGAACCCCT	1221.8	3.678e-38	598.867	3.678e-38
mmu-miR-216a	-1.96542	0.390417	13.558	11	28657017	+	AATCTCAGCTGGCAACTG	TAATCTCAGCTGGCAACTGTGA	186.125	1.00778e-17	94.7	0.408541
mmu-miR-190b	-1.11022	0.0519233	2.08036	3	89873951	+	TGATATGTTTGATATTGGGTT	TGATATGTTTGATATTGGGTT	804.425	3.678e-38	724.567	3.678e-38
mmu-miR-673-5p	1.42358	0.46145	9.92668	12	110810213	+	CACAGCTCTGGTCCTTG	CTCACAGCTCTGGTCCTTGGAG	1218.85	3.678e-38	1735.13	3.678e-38
mmu-miR-302b	-2.55475	0.725732	22.9382	3	127248192	+	AAGTGCTTCCATGTTTTAGTA	TAAGTGCTTCCATGTTTTAGTAG	2054.7	3.678e-38	804.267	3.678e-38
mmu-miR-374*	-2.39979	0.451147	16.2666	X	100768436	-	GGTTGTATTATCATTGTCCG	GGTTGTATTATCATTGTCCGAG	169.825	2.31461e-13	70.7667	0.763596
mmu-miR-666-5p	1.37865	0.125301	5.64826	12	110955312	+	AGCGGGCACAGCTGTGA	AGCGGGCACAGCTGTGAGAGCC	209.65	3.20417e-16	289.033	3.678e-38
mmu-miR-540-3p	3.45656	0.737728	31.7268	12	110824331	+	GGTCAGAGGTCGATCCT	AGGTCAGAGGTCGATCCTGG	484.2	3.678e-38	1673.67	3.678e-38
mmu-miR-539	-3.17534	1.58713	25.8114	12	110966345	+	GGAGAAATTATCCTTGGTGT	GGAGAAATTATCCTTGGTGTGT	359.025	3.678e-38	113.067	0.0311697
mmu-miR-20b*	-1.16081	0.102588	3.3824	X	50095321	-	TGCAGTGTGAGCACTTCTA	ACTGCAGTGTGAGCACTTCTAG	265.4	3.678e-38	228.633	1.69205e-14
mmu-miR-702	-1.85957	0.349111	11.399	5	137467389	+	TGCCCACCCTTTACCCC	TGCCCACCCTTTACCCCGCTC	385.675	3.678e-38	207.4	3.02851e-16
mmu-miR-448	-3.15091	0.479277	19.9029	X	143592823	+	TGCATATGTAGGATGTCCC	TTGCATATGTAGGATGTCCCAT	276.125	3.678e-38	87.6333	0.492249
mmu-miR-376a*	-4.31467	1.15012	29.1924	12	110961995	+	GGTAGATTCTCCTTCTATGAG	GGTAGATTCTCCTTCTATGAGT	410.9	3.678e-38	95.2333	0.379642
mmu-miR-686	3.6623	0.390002	27.722	14	55235605	-	TGCTTCCCAGACGGTGA	ATTGCTTCCCAGACGGTGAAGA	322.175	3.678e-38	1179.9	3.678e-38
mmu-miR-463*	-3.8508	0.794161	26.2006	X	64052470	-	TACCTAATTTGTTGTCCATCA	TACCTAATTTGTTGTCCATCAT	290.35	3.678e-38	75.4	0.628492
mmu-miR-741	-4.45535	0.512309	23.5067	X	64050007	-	GAGATGCCATTCTATGTA	TGAGAGATGCCATTCTATGTAGA	334.3	3.678e-38	75.0333	0.722822
mmu-miR-665	2.66445	0.318349	21.5527	12	110824577	+	ACCAGGAGGCTGAGGTC	ACCAGGAGGCTGAGGTCCCT	465.325	3.678e-38	1239.83	3.678e-38

## Sheet: Control_Data
		Paramters	0.3		0.5		40		10		4000		150		100
Mark		Failures (%)		8.33333		0		16.6667		0		0		16.6667		16.6667	50
			Neg. Ctrl	Eval.	PAP Ctrl	Eval.	Internal MM Ctrl	Eval.	Extension Ctrls	Eval.	SAM Hyb Ctrls	Eval.	Contamin Ctrls	Eval.	miRNA/bkgd	Eval.	Annealing Ctrls
0		wt1	0.425931	0	0.923577	0	127.536	0	16.4182	0	6081.25	0	170.43	0	172.551	0	0
0		wt2	0.55197	0	0.868595	0	127.389	0	19.2237	0	5921.75	0	165.869	0	171.102	0	0
0		wt3	0.416298	0	0.915039	0	46.9561	0	21.6697	0	5873.5	0	182.192	0	179.032	0	0
1		wt4	0.535676	0	0.882831	0	135.989	0	14.7908	0	5657.5	0	215.26	0	162.263	0	1
1		337	0.521805	0	0.756266	0	48.8641	0	44.0423	0	6371.5	0	335.55	0	127.286	0	1
3		338	0.573667	0	0.624202	0	146.457	0	90.549	0	6972.25	0	149.074	1	64.0238	1	1
1		343	0.544635	0	0.740285	0	164.456	0	20.5638	0	6696.25	0	329.492	0	131.511	0	1
2		346	0.519499	0	0.844053	0	21.319	1	24.9572	0	6658.25	0	264.029	0	172.968	0	1
0		437	0.332204	0	0.926021	0	126.914	0	22.1786	0	6349.75	0	203.29	0	167.787	0	0
5		438	0.27225	1	0.710767	0	3.01656	1	14.0991	0	6248	0	58.4444	1	45.2253	1	1
0		448	0.473506	0	0.930435	0	128.128	0	15.2802	0	6279.75	0	212.062	0	173.316	0	0
0		449	0.416711	0	0.957336	0	98.5117	0	15.0817	0	6206.75	0	165.271	0	157.836	0	0
		TargetID	ARRAY HYB CONTROL	ARRAY HYB CONTROL	ARRAY HYB CONTROL	ARRAY HYB CONTROL	EXTENSION MISMATCH CONTROL	EXTENSION MISMATCH CONTROL	EXTENSION MISMATCH CONTROL	EXTENSION MISMATCH CONTROL	INTERNAL SINGLE MISMATCH CONTROL	INTERNAL SINGLE MISMATCH CONTROL	INTERNAL SINGLE MISMATCH CONTROL	INTERNAL SINGLE MISMATCH CONTROL	INTERNAL SINGLE MISMATCH CONTROL	INTERNAL SINGLE MISMATCH CONTROL	INTERNAL SINGLE MISMATCH CONTROL	INTERNAL SINGLE MISMATCH CONTROL	INTERNAL SINGLE MISMATCH CONTROL	INTERNAL SINGLE MISMATCH CONTROL	INTERNAL SINGLE MISMATCH CONTROL	NEGATIVE	NEGATIVE	NEGATIVE	NEGATIVE	NEGATIVE	NEGATIVE	NEGATIVE	NEGATIVE	NEGATIVE	NEGATIVE	NEGATIVE	NEGATIVE	NEGATIVE	NEGATIVE	NEGATIVE	NEGATIVE	NEGATIVE	PAP CONTROL	PAP CONTROL	PAP CONTROL	PAP CONTROL	PAP CONTROL	PAP CONTROL	PAP CONTROL	PAP CONTROL	PAP CONTROL	PCR CONTAMINATION	PCR CONTAMINATION
		ProbeID	1003	278	44	501	1864	1866	1902	1992	1070	1716	3001	3007	3022	3183	3290	4999	526	590	662	1142	1237	1306	1365	1573	1578	1692	1742	2109	2165	3137	329	3511	3885	4254	4824	975	1038	127	1299	134	3183	3299	3324	3500	898	2011	910
		TargetID	ARRAY HYB CONTROL	ARRAY HYB CONTROL	ARRAY HYB CONTROL	ARRAY HYB CONTROL	EXTENSION MISMATCH CONTROL	EXTENSION MISMATCH CONTROL	EXTENSION MISMATCH CONTROL	EXTENSION MISMATCH CONTROL	INTERNAL SINGLE MISMATCH CONTROL	INTERNAL SINGLE MISMATCH CONTROL	INTERNAL SINGLE MISMATCH CONTROL	INTERNAL SINGLE MISMATCH CONTROL	INTERNAL SINGLE MISMATCH CONTROL	INTERNAL SINGLE MISMATCH CONTROL	INTERNAL SINGLE MISMATCH CONTROL	INTERNAL SINGLE MISMATCH CONTROL	INTERNAL SINGLE MISMATCH CONTROL	INTERNAL SINGLE MISMATCH CONTROL	INTERNAL SINGLE MISMATCH CONTROL	NEGATIVE	NEGATIVE	NEGATIVE	NEGATIVE	NEGATIVE	NEGATIVE	NEGATIVE	NEGATIVE	NEGATIVE	NEGATIVE	NEGATIVE	NEGATIVE	NEGATIVE	NEGATIVE	NEGATIVE	NEGATIVE	NEGATIVE	PAP CONTROL	PAP CONTROL	PAP CONTROL	PAP CONTROL	PAP CONTROL	PAP CONTROL	PAP CONTROL	PAP CONTROL	PAP CONTROL	PCR CONTAMINATION	PCR CONTAMINATION
		ProbeID	1003	278	44	501	1864	1866	1902	1992	1070	1716	3001	3007	3022	3183	3290	4999	526	590	662	1142	1237	1306	1365	1573	1578	1692	1742	2109	2165	3137	329	3511	3885	4254	4824	975	1038	127	1299	134	3183	3299	3324	3500	898	2011	910
		wt1.AVG_Signal	7576	6969	4082	5698	74	85	391	3010	167	86	23293	21344	24453	16891	106	72	157	106	222	95	126	79	78	60	97	71	89	101	89	91	98	64	80	92	78	75	23089	3617	20621	1127	16891	2964	4970	25882	16986	79	13464
		wt2.AVG_Signal	7479	6663	3992	5553	95	153	208	2922	161	80	22010	20755	23885	15316	200	66	157	84	226	92	86	78	73	58	75	72	85	99	112	92	103	64	81	93	78	68	22858	4293	21083	1254	15316	2673	4602	25021	17073	84	13933
		wt3.AVG_Signal	7521	6620	3895	5458	98	63	166	2362	169	106	22777	21430	24509	15613	192	596	141	79	1069	82	81	70	68	54	213	64	79	90	63	75	89	56	75	85	70	61	22291	3414	20430	1755	15613	2900	5302	25315	17165	73	13300
		wt4.AVG_Signal	7235	6279	3800	5316	68	330	104	2475	145	78	22498	20752	24023	13998	96	60	138	81	216	88	99	74	70	55	106	69	77	91	212	80	86	60	74	87	73	63	22472	4015	20096	1580	13998	2271	3325	24476	16730	73	15714
		337.AVG_Signal	7504	7392	4819	5771	62	51	100	3127	917	70	24287	23088	24940	11406	81	51	163	74	783	81	87	64	63	49	339	61	96	86	549	67	85	50	69	76	59	54	25146	8453	23034	6652	11406	75	4464	23708	19997	60	20133
		338.AVG_Signal	8263	8106	5146	6374	55	50	48	4618	277	67	26969	25270	27596	10641	83	49	145	75	129	87	73	62	60	47	3172	59	106	77	48	59	74	46	67	71	53	51	30288	16947	28456	16731	10641	69	733	22940	25961	54	8050
		343.AVG_Signal	8108	7719	4827	6131	62	55	220	2310	172	70	26373	25139	27912	12316	81	53	158	74	143	82	85	64	63	51	453	63	87	82	533	66	81	49	68	85	60	56	27170	10622	24493	6828	12316	88	2214	25725	22485	59	19440
		346.AVG_Signal	7955	7666	5051	5961	71	58	175	2529	1563	681	25515	23880	26478	15461	89	64	271	74	2493	85	76	162	68	59	58	66	110	90	256	74	91	59	71	86	68	60	24772	5958	22800	3632	15461	1287	3311	26079	20677	68	17954
		437.AVG_Signal	7672	7352	4705	5670	67	59	182	2277	161	77	23446	22397	24825	15264	264	69	152	75	281	156	79	69	69	54	211	65	85	86	80	85	89	58	75	84	64	85	23087	3646	20898	1871	15264	1680	2816	25706	16063	69	14027
		438.AVG_Signal	7699	6965	4586	5742	145	67	484	3271	10254	6234	24744	23672	24369	4955	203	2297	137	147	11937	95	82	70	68	56	292	66	2445	83	478	456	82	58	80	82	365	230	24638	8424	23434	8023	4955	127	2332	18159	19679	117	6838
		448.AVG_Signal	7748	7185	4439	5747	343	69	241	3326	173	86	22914	21559	24499	17091	103	68	173	84	223	90	89	81	79	62	105	76	92	101	112	87	104	65	82	90	79	69	23114	3523	20952	2126	17091	2856	4862	25461	16533	81	17177
		449.AVG_Signal	7572	7156	4410	5689	122	187	352	3323	172	87	22440	21199	24132	16750	117	71	163	89	449	89	84	81	87	60	163	76	91	105	150	94	102	68	86	94	76	73	22665	3273	19933	2791	16750	2301	4877	25292	15383	85	14048
[truncated: 3 more columns]

## Sheet: Raw_Data
								Sample1				Sample2				Sample3
# of Errors
0		CHROMOSOME	PROBE_COORDINATES	PROBE_CHR_ORIENTATION	PROBESEQ	TARGETMATURESEQS	TargetID	AVG_Signal	BEAD_STDERR	ARRAY_STDEV	Detection Pval	AVG_Signal	BEAD_STDERR	ARRAY_STDEV	Detection Pval	AVG_Signal	BEAD_STDERR	ARRAY_STDEV	Detection Pval
	TargetID	CHROMOSOME	PROBE_COORDINATES	PROBE_CHR_ORIENTATION	PROBESEQ	TARGETMATURESEQS	TargetID	wt.AVG_Signal	wt.BEAD_STDERR	wt.ARRAY_STDEV	wt.Detection Pval	cs2.AVG_Signal	cs2.BEAD_STDERR	cs2.ARRAY_STDEV	cs2.Detection Pval	mlp.AVG_Signal	mlp.BEAD_STDERR	mlp.ARRAY_STDEV	mlp.Detection Pval
	mmu-let-7a	9,13	4134481448633630	+,-	TGAGGTAGTAGGTTGTATAG	TGAGGTAGTAGGTTGTATAGTT	mmu-let-7a	22789.5	277.656	767	3.678e-38	24923	305.315	369.45	3.678e-38	22410.1	270.328	766.249	3.678e-38
	mmu-let-7b	15	85537754	+	TGAGGTAGTAGGTTGTGTG	TGAGGTAGTAGGTTGTGTGGTT	mmu-let-7b	24886.3	298.677	499.796	3.678e-38	28673.7	306.418	1795.27	3.678e-38	24779.7	277.282	761.657	3.678e-38
	mmu-let-7b*	15	85537808	+	ACAACCTACTGCCTTC	CTATACAACCTACTGCCTTCCC	mmu-let-7b*	215.65	4.97395	181.328	4.54142e-36	177.733	2.58427	45.0943	1.62289e-06	849.267	17.0846	715.597	3.678e-38
	mmu-let-7c	15,16	8553704577599910	+,+	TGAGGTAGTAGGTTGTATG	TGAGGTAGTAGGTTGTATGGTT	mmu-let-7c	21282.4	262.173	611.247	3.678e-38	23659.5	294.07	514.477	3.678e-38	21016.9	272.23	814.903	3.678e-38
	mmu-let-7c-1*	16	77599961	+	CTGTACAACCTTCTAGC	CTGTACAACCTTCTAGCTTTCC	mmu-let-7c-1*	135.3	2.83777	51.0508	4.38826e-06	79.5333	1.14903	9.31522	0.580333	117.567	2.22728	80.4173	0.000814802
	mmu-let-7c-2*,mmu-let-7a*	15,13	8553709348633570	+,-	CTATACAATCTACTGTCTTTCC	CTATACAATCTACTGTCTTTCC,CTATACAATCTACTGTCTTTCC	mmu-let-7c-2*,mmu-let-7a*	6712.38	98.98	603.01	3.678e-38	2746.13	52.5737	2275.86	3.678e-38	5852.27	86.7477	743.022	3.678e-38
	mmu-let-7d	13	48631469	-	AGAGGTAGTAGGTTGCATA	AGAGGTAGTAGGTTGCATAGTT	mmu-let-7d	22153.8	266.938	598.428	3.678e-38	24475.4	301.95	1025.28	3.678e-38	21837	266.305	534.338	3.678e-38
	mmu-let-7d*	13	48631415	-	TATACGACCTGCTGCCTT	CTATACGACCTGCTGCCTTTCT	mmu-let-7d*	13794.6	193.1	1382.44	3.678e-38	16823	214.024	1824.06	3.678e-38	12427.9	161.375	293.813	3.678e-38
	mmu-let-7e	17	17967329	+	TGAGGTAGGAGGTTGTATA	TGAGGTAGGAGGTTGTATAGTT	mmu-let-7e	15555.2	212.541	1042.46	3.678e-38	20970.3	276.691	1155.55	3.678e-38	16231.8	218.167	1660.53	3.678e-38
	mmu-let-7f	X,13	1.48347e+16	+,-	TGAGGTAGTAGATTGTATAGT	TGAGGTAGTAGATTGTATAGTT	mmu-let-7f	24549.3	284.032	528.902	3.678e-38	26791.2	304.058	1724.38	3.678e-38	24406.3	271.203	254.842	3.678e-38
	mmu-let-7f*	13	48633224	-	ATACAATCTATTGCCTTC	CTATACAATCTATTGCCTTCCC	mmu-let-7f*	373.85	7.67636	354.382	3.678e-38	325.533	4.9932	235.602	3.08399e-28	215.033	3.87956	65.0146	2.11417e-33
	mmu-let-7g	9	106081176	+	TGAGGTAGTAGTTTGTACAG	TGAGGTAGTAGTTTGTACAGTT	mmu-let-7g	23522.9	288.695	492.413	3.678e-38	24700.2	280.282	826.931	3.678e-38	23284.9	288.503	824.915	3.678e-38
	mmu-let-7g*	9	106081232	+	ACTGTACAGGCCACTG	ACTGTACAGGCCACTGCCTTGC	mmu-let-7g*	240.275	6.3901	31.0877	3.678e-38	417.5	5.7237	147.428	3.678e-38	279.3	6.43256	45.2812	3.678e-38
	mmu-let-7i	10	122422776	-	TGAGGTAGTAGTTTGTGCT	TGAGGTAGTAGTTTGTGCTGTT	mmu-let-7i	23333.1	281.378	871.575	3.678e-38	25170.7	281.554	923.394	3.678e-38	23340.4	270.634	1010.07	3.678e-38
	mmu-let-7i*	10	122422720	-	GCGCAAGCTACTGCCTTGCT	CTGCGCAAGCTACTGCCTTGCT	mmu-let-7i*	279.975	5.75667	52.4621	3.678e-38	616.867	11.9144	776.481	3.678e-38	676.767	11.8285	107.24	3.678e-38
	mmu-miR-1	18,2	1.07855e+16	-,+	TGGAATGTAAAGAAGTATGT	TGGAATGTAAAGAAGTATGTAT	mmu-miR-1	11039.8	167.826	987.253	3.678e-38	6887.8	127.55	2406.13	3.678e-38	13184	211.185	1053.32	3.678e-38
	mmu-miR-100	9	41339519	+	ACCCGTAGATCCGAACTTG	AACCCGTAGATCCGAACTTGTG	mmu-miR-100	12787.8	175.767	1216.78	3.678e-38	9642.8	131.023	1217.38	3.678e-38	13480.2	169.208	912.302	3.678e-38
	mmu-miR-101a	4	101019583	-	TACAGTACTGTGATAACTGAA	TACAGTACTGTGATAACTGAA	mmu-miR-101a	4443.07	76.2889	1150.93	3.678e-38	2906.07	43.5136	1493.38	3.678e-38	5232.93	80.0656	1532.92	3.678e-38
	mmu-miR-101a*	4	101019620	-	TCAGTTATCACAGTGCTGATG	TCAGTTATCACAGTGCTGATGC	mmu-miR-101a*	590.55	12.8703	403.771	3.678e-38	312.267	5.12408	377.047	5.01582e-20	853.533	15.595	566.748	3.678e-38
	mmu-miR-101a:9.1	0	0	+	TACAGTACTGTGATAACTGAAG	TACAGTACTGTGATAACTGAAG	mmu-miR-101a:9.1	4044.97	66.57	1333.68	3.678e-38	3148.7	46.7567	1069.13	3.678e-38	4200.67	69.4133	1620.71	3.678e-38
	mmu-miR-101b	19	29209828	+	TACAGTACTGTGATAGCTGAA	TACAGTACTGTGATAGCTGAA	mmu-miR-101b	4869.07	80.196	1172	3.678e-38	2253.77	36.9921	1166.65	3.678e-38	4748.67	75.7919	824.864	3.678e-38
	mmu-miR-101b:9.1	0	0	+	TACAGTACTGTGATAGCTGAAG	TACAGTACTGTGATAGCTGAAG	mmu-miR-101b:9.1	5163.3	85.2308	658.538	3.678e-38	3936.03	60.7124	982.928	3.678e-38	5329.27	89.7456	532.421	3.678e-38
	mmu-miR-103	11,2	3.55959e+16	+,+	AGCATTGTACAGGGCTATG	AGCAGCATTGTACAGGGCTATGA	mmu-miR-103	20842.3	263.505	641.938	3.678e-38	17286.7	210.881	1584.52	3.678e-38	17757.3	231.469	1076.59	3.678e-38
	mmu-miR-105	X	69836909	-	CAAGTGCTCAGATGCTTGT	CCAAGTGCTCAGATGCTTGTGGT	mmu-miR-105	197.225	4.81969	188.175	2.5468e-22	92.2	1.23669	4.17612	0.373367	89.9	1.60799	6.84324	0.110954
	mmu-miR-106a	X	50095741	-	AAAGTGCTAACAGTGCAGGTA	CAAAGTGCTAACAGTGCAGGTAG	mmu-miR-106a	3617.25	65.5694	1134.7	3.678e-38	2117.1	33.5774	209.059	3.678e-38	3767.27	65.3753	706.625	3.678e-38
	mmu-miR-106a:9.1	0	0	+	AAGTGCTGACAGTGCAGG	CAAAGTGCTAACAGTGCAGGTA	mmu-miR-106a:9.1	119.275	2.53891	4.61979	0.00035953	152.4	1.89564	19.8598	0.000667221	143.367	2.28436	36.5098	5.10067e-10
	mmu-miR-106b	5	138607036	-	AAGTGCTGACAGTGCAGA	TAAAGTGCTGACAGTGCAGAT	mmu-miR-106b	8641.85	121	1351.81	3.678e-38	8278.93	110.652	1229.54	3.678e-38	8955.53	118.274	848.416	3.678e-38
	mmu-miR-106b*	5	138606996	-	GCACTGTGGGTACTTGCT	CCGCACTGTGGGTACTTGCTGC	mmu-miR-106b*	2657.15	44.4158	195.479	3.678e-38	1917.57	31.0266	742.303	3.678e-38	2888.63	42.0184	542.544	3.678e-38
	mmu-miR-107	19	34895213	-	AGCATTGTACAGGGCTATC	AGCAGCATTGTACAGGGCTATCA	mmu-miR-107	4880.57	79.4301	767.336	3.678e-38	2202.17	40.8124	1132.08	3.678e-38	3885.77	59.3531	514.057	3.678e-38
	mmu-miR-10a	11	96178499	+	TACCCTGTAGATCCGAATT	TACCCTGTAGATCCGAATTTGTG	mmu-miR-10a	5840.65	90.9062	754.331	3.678e-38	2997.03	64.4807	3630.71	3.678e-38	6002.2	87.0554	313.882	3.678e-38
	mmu-miR-10a*	11	96178540	+	CAAATTCGTATCTAGG	CAAATTCGTATCTAGGGGAATA	mmu-miR-10a*	165.1	3.27169	26.8987	7.05178e-12	388.367	3.0527	207.388	7.25003e-32	157.467	2.54656	7.6173	4.2594e-13
	mmu-miR-10b	2	74564130	+	TACCCTGTAGAACCGAATT	TACCCTGTAGAACCGAATTTGTG	mmu-miR-10b	3265.57	54.3618	697.243	3.678e-38	2273.1	40.2261	1100.17	3.678e-38	3344.33	54.0343	451.752	3.678e-38
	mmu-miR-10b*	2	74564170	+	AGATTCGATTCTAGGG	CAGATTCGATTCTAGGGGAATA	mmu-miR-10b*	393.575	8.15325	209.821	3.678e-38	233.833	2.59462	52.4234	2.38578e-10	243.667	4.85745	102.133	3.678e-38
	mmu-miR-1186	8	32213495	-	GCTGGAATTAAAGGCATG	GAGTGCTGGAATTAAAGGCATG	mmu-miR-1186	423.1	8.79828	309.707	3.678e-38	1000.47	15.2163	645.475	3.678e-38	567.3	9.01705	324.192	3.678e-38
	mmu-miR-1187	5	83228012	-	TATGTGTGTGTGTATGTGTGTAA	TATGTGTGTGTGTATGTGTGTAA	mmu-miR-1187	929.6	18.71	172.962	3.678e-38	2766.77	41.9912	1684.37	3.678e-38	438.3	7.10794	142.458	3.678e-38
	mmu-miR-1188	12	110850050	+	TGTGAGGTTGGGCCAG	TGGTGTGAGGTTGGGCCAGGA	mmu-miR-1188	82.8	1.8524	3.36749	0.304506	80.6	1.08766	1.38924	0.605045	101.133	1.56514	20.9572	0.0183527
	mmu-miR-1190	12	102259924	-	CAGCTGAGGTTCCCCT	TCAGCTGAGGTTCCCCTCTGTC	mmu-miR-1190	153.95	3.1899	16.1002	1.10597e-09	163.133	1.78812	10.7528	0.000312997	150.733	2.97748	11.0527	2.99508e-11
	mmu-miR-1191	7	27990633	+	CAGTCTTACTATGTAGCCCTA	CAGTCTTACTATGTAGCCCTA	mmu-miR-1191	2512.95	44.5847	176.86	3.678e-38	2871.63	43.953	905.82	3.678e-38	2666.83	41.8723	319.902	3.678e-38
	mmu-miR-1192	19	23223939	+	AAACAAACAAACAGACCAAAT	AAACAAACAAACAGACCAAATT	mmu-miR-1192	104.875	2.32611	4.66789	0.0121939	127.267	1.43941	14.8514	0.0320746	107.5	2.08981	19.3256	0.00326651
	mmu-miR-1193	12	110953959	+	TAGGTCACCCGTTTTACTATC	TAGGTCACCCGTTTTACTATC	mmu-miR-1193	320.525	8.32119	262.162	3.678e-38	301.7	8.79795	334.592	3.678e-38	145.6	2.50646	14.2755	4.95974e-10
	mmu-miR-1194	0	0	+	GAATGAGTAACTGCTAGATCCT	GAATGAGTAACTGCTAGATCCT	mmu-miR-1194	139.05	3.18729	73.7351	2.92941e-08	108.8	1.49422	20.6814	0.139168	88.9667	1.83609	20.4591	0.112116
	mmu-miR-1195	17	71209921	-	TGAGTTCGAGGCCAGC	TGAGTTCGAGGCCAGCCTGCTCA	mmu-miR-1195	23416.8	275.189	234.3	3.678e-38	22693.3	281.038	516.773	3.678e-38	23946.9	279.769	1383.16	3.678e-38
	mmu-miR-1196	14	62371156	-	AAATCTACCTGCCTCTGC	AAATCTACCTGCCTCTGCCT	mmu-miR-1196	117.825	2.60731	26.2131	0.00123623	250.8	4.09383	124.928	1.22916e-17	162.533	2.98668	116.532	5.27543e-16
	mmu-miR-1197	12	110950605	+	TAGGACACATGGTCTACTTCT	TAGGACACATGGTCTACTTCT	mmu-miR-1197	256.575	5.62121	15.6071	3.678e-38	467.433	4.09192	150.735	3.678e-38	300.467	5.02334	44.623	3.678e-38
	mmu-miR-1198	X	7384267	+	GTGTTCCTGGCTGGCT	TATGTGTTCCTGGCTGGCTTGG	mmu-miR-1198	1859.15	31.2179	445.941	3.678e-38	3027.83	42.5563	370.519	3.678e-38	1578.7	23.7645	243.643	3.678e-38
	mmu-miR-1199	8	86535513	-	TCTGAGTCCCGGTCGC	TCTGAGTCCCGGTCGCGCGG	mmu-miR-1199	302.1	6.36935	233.073	3.678e-38	294.7	2.31336	95.8438	6.82058e-18	192.6	2.78511	29.8849	1.04625e-25
	mmu-miR-122	18	65408519	+	GAGTGTGACAATGGTGTTT	TGGAGTGTGACAATGGTGTTTG	mmu-miR-122	850.025	17.0452	614.542	3.678e-38	734.1	14.7575	475.539	3.678e-38	458.733	8.55318	312.494	3.678e-38
	mmu-miR-1224	16	20604524	+	GAGGACTGGGGAGGTG	GTGAGGACTGGGGAGGTGGAG	mmu-miR-1224	103.775	2.32316	5.54519	0.0158749	143.733	1.58176	23.2711	0.00712591	121.467	2.06338	8.25126	3.92887e-05
	mmu-miR-124	2,14,3	1.80629e+24	+,+,+	TAAGGCACGCGGTGAAT	TAAGGCACGCGGTGAATGCC	mmu-miR-124	78.525	1.88024	15.4838	0.404282	131.667	2.51453	96.6783	0.000861061	91.8667	1.68383	14.7842	0.0728622
	mmu-miR-124*	14,2,3	6.52095e+24	+,+,+	TGTTCACAGCGGACCT	CGTGTTCACAGCGGACCTTGAT	mmu-miR-124*	62.625	1.51399	3.06526	0.846972	62.0667	0.986842	2.1362	0.869172	60.3667	1.26594	1.19304	0.922605
	mmu-miR-125a-3p	17	17967818	+	GTGAGGTTCTTGGGAGCC	ACAGGTGAGGTTCTTGGGAGCC	mmu-miR-125a-3p	314.525	6.28397	106.867	3.678e-38	388.833	4.46804	444.329	1.41575e-28	175.5	3.32646	31.0619	2.35411e-19
	mmu-miR-125a-5p	17	17967780	+	TCCCTGAGACCCTTTAAC	TCCCTGAGACCCTTTAACCTGTGA	mmu-miR-125a-5p	22307.1	268.791	699.758	3.678e-38	22979.7	277.417	74.1895	3.678e-38	23055.8	258.779	905.538	3.678e-38
	mmu-miR-125b*	16	77646562	+	GTCAGGTTCTTGGGACCT	ACAAGTCAGGTTCTTGGGACCT	mmu-miR-125b*	753.1	13.4219	290.293	3.678e-38	850.967	13.4309	670.476	3.678e-38	890.467	16.8662	508.205	3.678e-38
	mmu-miR-125b-3p	9	41390062	+	GTTAGGCTCTTGGGAG	ACGGGTTAGGCTCTTGGGAGCT	mmu-miR-125b-3p	261.65	6.80189	186.008	3.678e-38	337.6	4.50374	237.879	6.56745e-32	260.367	4.1315	46.5897	3.678e-38
	mmu-miR-125b-5p	16,9	7764652341390020	+,+	TCCCTGAGACCCTAACTT	TCCCTGAGACCCTAACTTGTGA	mmu-miR-125b-5p	26494.3	280.127	212.7	3.678e-38	24762.9	275.798	906.382	3.678e-38	27171.7	288.708	1373.91	3.678e-38
	mmu-miR-126-3p	2	26446921	+	TCGTACCGTGAGTAATAAT	TCGTACCGTGAGTAATAATGCG	mmu-miR-126-3p	25586.9	303.328	710.267	3.678e-38	17603.8	222.704	5141.26	3.678e-38	25434.5	258.059	1251.68	3.678e-38
	mmu-miR-126-5p	2	26446884	+	CATTATTACTTTTGGTACGC	CATTATTACTTTTGGTACGCG	mmu-miR-126-5p	29467.4	335.265	485.6	3.678e-38	28350	344.291	1590.84	3.678e-38	29386.5	307.836	560.723	3.678e-38
	mmu-miR-127	12	110831097	+	TCGGATCCGTCTGAGCTT	TCGGATCCGTCTGAGCTTGGCT	mmu-miR-127	2430.47	46.6994	569.158	3.678e-38	1672.3	32.8664	997.956	3.678e-38	2282.03	33.6267	279.389	3.678e-38
	mmu-miR-127*	12	110831063	+	AGCTCAGAGGGCTCTGA	CTGAAGCTCAGAGGGCTCTGAT	mmu-miR-127*	180.175	4.2211	93.1379	1.41619e-20	173.633	4.30853	177.247	1.50469e-09	253.367	4.37148	90.6777	3.678e-38
	mmu-miR-128	9,1	1.12021e+17	-,+	ACAGTGAACCGGTCTCTTT	TCACAGTGAACCGGTCTCTTT	mmu-miR-128	9937.25	133.858	256.959	3.678e-38	8330.47	117.894	545.904	3.678e-38	9168.37	132.93	312.416	3.678e-38
	mmu-miR-128a:9.1	0	0	+	CAGTGAACCGGTCTCTTTC	TCACAGTGAACCGGTCTCTTTC	mmu-miR-128a:9.1	4453.32	77.5166	379.567	3.678e-38	3401.3	57.6298	92.2801	3.678e-38	3889.42	70.9237	400.512	3.678e-38
	mmu-miR-129-3p	2	94081555	-	AAGCCCTTACCCCAAAAA	AAGCCCTTACCCCAAAAAGCAT	mmu-miR-129-3p	551.775	12.4909	220.652	3.678e-38	113.467	2.43772	82.2152	0.0161962	430.867	9.00755	209.891	3.678e-38
	mmu-miR-129-5p	6,2	2897262394081590	+,-	TTTTTGCGGTCTGGGCTT	CTTTTTGCGGTCTGGGCTTGC	mmu-miR-129-5p	377.55	7.94855	229.659	3.678e-38	1010.6	18.8217	1153.82	3.678e-38	336.267	5.89328	49.1416	3.678e-38
	mmu-miR-1-2-as	18	10785483	+	TACATACTTCTTTACATTCCA	TACATACTTCTTTACATTCCA	mmu-miR-1-2-as	139.85	3.23174	96.9472	1.18987e-05	1731.67	25.9879	1428.82	3.678e-38	83.1333	1.61812	3.84231	0.283435
	mmu-miR-130a	2	84581295	-	CAGTGCAATGTTAAAAGGG	CAGTGCAATGTTAAAAGGGCAT	mmu-miR-130a	13542.5	175.303	409.057	3.678e-38	12941.7	161.921	905.574	3.678e-38	13222.6	158.851	394.734	3.678e-38
	mmu-miR-130b	16	17124186	-	CAGTGCAATGATGAAAGG	CAGTGCAATGATGAAAGGGCAT	mmu-miR-130b	691.425	16.3596	532.079	3.678e-38	921.167	17.04	818.831	3.678e-38	995.867	16.471	136.265	3.678e-38
	mmu-miR-130b*	16	17124224	-	CTCTTTCCCTGTTGCACTA	ACTCTTTCCCTGTTGCACTACT	mmu-miR-130b*	900.575	17.8443	307.766	3.678e-38	2085.77	30.7732	1494.55	3.678e-38	1276.5	21.0278	412.254	3.678e-38
	mmu-miR-132	11	74987224	+	TAACAGTCTACAGCCATGG	TAACAGTCTACAGCCATGGTCG	mmu-miR-132	8711.75	116.046	491.819	3.678e-38	9199.3	124.012	666.981	3.678e-38	8563.67	112.361	407.84	3.678e-38
	mmu-miR-133a	18,2	1.07829e+16	-,+	GTCCCCTTCAACCAGCTG	TTTGGTCCCCTTCAACCAGCTG	mmu-miR-133a	20509.9	241.577	872.153	3.678e-38	19919.9	228.798	1040.18	3.678e-38	20792.7	229.01	432.378	3.678e-38
	mmu-miR-133a*	2,18	1.80133e+16	+,-	GCTGGTAAAATGGAACCA	GCTGGTAAAATGGAACCAAAT	mmu-miR-133a*	16761	216.554	1568.23	3.678e-38	10702.4	145.28	769.027	3.678e-38	16239.8	208.037	733.686	3.678e-38
	mmu-miR-133b	1	20672914	+	GTCCCCTTCAACCAGCTA	TTTGGTCCCCTTCAACCAGCTA	mmu-miR-133b	21763.9	279.003	1378.53	3.678e-38	20487.7	249.095	2573.66	3.678e-38	23248.1	278.434	432.529	3.678e-38
	mmu-miR-134	12	110972354	+	TGTGACTGGTTGACCAGA	TGTGACTGGTTGACCAGAGGGG	mmu-miR-134	831.675	17.6752	311.222	3.678e-38	1481.57	29.4869	1004.28	3.678e-38	1129.9	17.8936	378.993	3.678e-38
	mmu-miR-135a	10,9	9.15349e+16	-,+	TATGGCTTTTTATTCCTATG	TATGGCTTTTTATTCCTATGTGA	mmu-miR-135a	7519.93	101.454	448.977	3.678e-38	1405.4	30.4456	1348.68	3.678e-38	5271.37	83.9112	1332.61	3.678e-38
	mmu-miR-135a*	9	106056509	+	TATAGGGATTGGAGCCG	TATAGGGATTGGAGCCGTGGCG	mmu-miR-135a*	63.925	1.57493	0.4272	0.827163	65.9	0.989487	1.21244	0.826903	64.1	1.39279	0.360555	0.861271
	mmu-miR-135b	1	134094679	+	TATGGCTTTTCATTCCTAT	TATGGCTTTTCATTCCTATGTGA	mmu-miR-135b	313.825	6.71843	133.131	3.678e-38	341.5	2.91065	161.986	4.16771e-24	536.6	10.9378	535.063	3.678e-38
	mmu-miR-136	12	110833540	+	ACTCCATTTGTTTTGATGAT	ACTCCATTTGTTTTGATGATGG	mmu-miR-136	2606.45	43.2843	239.496	3.678e-38	735.6	20.111	935.587	3.678e-38	2201.53	35.355	823.683	3.678e-38
	mmu-miR-136*	12	110833575	+	ATCATCGTCTCAAATGAGTCT	ATCATCGTCTCAAATGAGTCTT	mmu-miR-136*	1805.42	35.4901	705.847	3.678e-38	471.367	10.5935	368.243	3.678e-38	2049.53	34.9055	1092.87	3.678e-38
	mmu-miR-137	3	118136818	+	TATTGCTTAAGAATACGCG	TTATTGCTTAAGAATACGCGTAG	mmu-miR-137	1674.7	34.8926	947.93	3.678e-38	481.867	15.3545	651.879	3.678e-38	1494.77	26.1049	670.457	3.678e-38
	mmu-miR-138	9,8	1.22592e+16	+,+	AGCTGGTGTTGTGAATC	AGCTGGTGTTGTGAATCAGGCCG	mmu-miR-138	361.6	7.30471	218.559	3.678e-38	540.967	7.42905	615.535	3.678e-38	266.033	4.87611	103.395	3.678e-38
	mmu-miR-138*	9	122592053	+	GGCTACTTCACAACACCAG	CGGCTACTTCACAACACCAGGG	mmu-miR-138*	124.775	2.54277	62.4242	2.19961e-05	503.433	6.0458	359.95	3.678e-38	261.567	4.57601	11.2305	3.678e-38
	mmu-miR-139-3p	7	108623931	+	GAGACGCGGCCCTGTT	TGGAGACGCGGCCCTGTTGGAG	mmu-miR-139-3p	211.625	4.5411	103.436	5.19521e-23	227.2	4.89177	133.228	1.27836e-15	250	4.84343	100.629	3.678e-38
	mmu-miR-139-5p	7	108623895	+	TCTACAGTGCACGTGTCT	TCTACAGTGCACGTGTCTCCAG	mmu-miR-139-5p	15363.8	216.103	665.541	3.678e-38	15319.1	213.414	1248.46	3.678e-38	14433.6	189.292	898.103	3.678e-38
	mmu-miR-140	8	110075148	+	AGTGGTTTTACCCTATGGTA	CAGTGGTTTTACCCTATGGTAG	mmu-miR-140	6129.32	88.5773	654.053	3.678e-38	4311.1	59.1073	1899.06	3.678e-38	6223.67	93.1973	1259.04	3.678e-38
	mmu-miR-140*	8	110075187	+	TACCACAGGGTAGAACCAC	TACCACAGGGTAGAACCACGG	mmu-miR-140*	7379.45	103.894	690.675	3.678e-38	7921.03	106.779	1186.14	3.678e-38	8178.4	118.71	917.6	3.678e-38
	mmu-miR-141	6	124667957	-	TAACACTGTCTGGTAAAGATG	TAACACTGTCTGGTAAAGATGG	mmu-miR-141	136.675	2.75788	26.1534	3.38027e-06	224.467	1.84285	110.969	5.96165e-08	169.2	3.17733	45.2636	1.9391e-17
	mmu-miR-141*	6	124667999	-	ATCTTCCAGTGCAGTGTTG	CATCTTCCAGTGCAGTGTTGGA	mmu-miR-141*	125.4	2.50313	94.3467	0.00130045	69.1	0.986842	1.4	0.787131	73.4333	1.52753	11.9304	0.594837
	mmu-miR-142-3p	11	87570404	+	TGTAGTGTTTCCTACTTTATG	TGTAGTGTTTCCTACTTTATGGA	mmu-miR-142-3p	4179.3	75.8829	1533.43	3.678e-38	773.3	22.1521	978.877	3.678e-38	5126.3	81.7177	2816.36	3.678e-38
	mmu-miR-142-5p	11	87570368	+	CATAAAGTAGAAAGCACTAC	CATAAAGTAGAAAGCACTACT	mmu-miR-142-5p	441.35	10.4906	271.318	3.678e-38	431.3	7.34411	518.023	3.678e-38	978.467	18.2008	579.432	3.678e-38
	mmu-miR-143	18	61808874	-	TGAGATGAAGCACTGTAGC	TGAGATGAAGCACTGTAGCTC	mmu-miR-143	23597.3	272.587	825.378	3.678e-38	15609.7	200.205	644.127	3.678e-38	22676.3	265.505	742.761	3.678e-38
	mmu-miR-144	11	77886548	+	TACAGTATAGATGATGTACT	TACAGTATAGATGATGTACT	mmu-miR-144	136.6	3.04106	70.3793	3.11713e-07	459.633	6.48165	421.3	3.678e-38	274.1	4.59084	105.112	3.678e-38
	mmu-miR-144:9.1	0	0	+	TACAGTATAGATGATGTACTAG	TACAGTATAGATGATGTACTAG	mmu-miR-144:9.1	465.175	9.5889	262.902	3.678e-38	532.333	7.15341	157.858	3.678e-38	923.5	17.5671	480.566	3.678e-38
	mmu-miR-145	18	61807543	-	GTCCAGTTTTCCCAGGAAT	GTCCAGTTTTCCCAGGAATCCCT	mmu-miR-145	20565.8	250.128	630.1	3.678e-38	19939.9	243.983	897.303	3.678e-38	20560.3	254.082	139.776	3.678e-38
	mmu-miR-145*	18	61807503	-	TTCCTGGAAATACTGTTCTTG	ATTCCTGGAAATACTGTTCTTG	mmu-miR-145*	1308.05	24.3146	485.739	3.678e-38	255.533	7.77771	316.505	2.23951e-29	1230.73	20.3981	141.936	3.678e-38
	mmu-miR-146a	11	43187959	-	AGAACTGAATTCCATGGGT	TGAGAACTGAATTCCATGGGTT	mmu-miR-146a	17153.7	226.321	595.775	3.678e-38	15379.1	199.884	2263.24	3.678e-38	16853.5	219.433	1248.79	3.678e-38
	mmu-miR-146b	19	46417279	+	GAGAACTGAATTCCATAGGC	TGAGAACTGAATTCCATAGGCT	mmu-miR-146b	2841.55	46.9735	335.535	3.678e-38	2629.93	47.6685	1938.21	3.678e-38	3443.23	55.3134	204.976	3.678e-38
	mmu-miR-146b*	19	46417317	+	GCCCTAGGGACTCAGTTC	GCCCTAGGGACTCAGTTCTGGT	mmu-miR-146b*	140.575	2.81714	24.2895	6.02664e-07	341.533	5.09735	278.972	3.80084e-26	179.7	2.87359	62.301	4.19206e-21
	mmu-miR-147	2	122466585	+	TGTGCGGAAATGCTTC	GTGTGCGGAAATGCTTCTGCTA	mmu-miR-147	394.525	9.76247	372.156	3.678e-38	1365.3	32.1206	2210.36	3.678e-38	484.933	8.61136	230.198	3.678e-38
	mmu-miR-148a	6	51219850	-	TCAGTGCACTACAGAACTTT	TCAGTGCACTACAGAACTTTGT	mmu-miR-148a	12467.9	172.864	1397.17	3.678e-38	9253.73	128.603	2155.44	3.678e-38	12777.9	160.495	1280.98	3.678e-38
	mmu-miR-148a*	6	51219888	-	AAGTTCTGAGACACTCCGAC	AAAGTTCTGAGACACTCCGACT	mmu-miR-148a*	234.725	5.63315	212.785	8.55763e-26	220	2.67401	238.331	3.87032e-08	117.367	1.83823	31.1969	8.2325e-05
	mmu-miR-148b	15	103115615	+	TCAGTGCATCACAGAACTT	TCAGTGCATCACAGAACTTTGT	mmu-miR-148b	5007.8	73.4128	436.432	3.678e-38	5973.63	79.9278	419.662	3.678e-38	5134.07	83.7448	679.884	3.678e-38
	mmu-miR-149	1	94746957	+	TCTGGCTCCGTGTCTTCA	TCTGGCTCCGTGTCTTCACTCCC	mmu-miR-149	15372.5	213.548	891.545	3.678e-38	12551.4	155.631	390.482	3.678e-38	13695.1	168.52	1249.01	3.678e-38
	mmu-miR-150	7	52377131	+	TCTCCCAACCCTTGTACC	TCTCCCAACCCTTGTACCAGTG	mmu-miR-150	17775.4	232.302	652.165	3.678e-38	16668.7	223.568	424.006	3.678e-38	15783.8	201.728	869.054	3.678e-38
	mmu-miR-150*	7	52377167	+	CTGGTACAGGCCTGGG	CTGGTACAGGCCTGGGGGATAG	mmu-miR-150*	71.425	1.72439	2.91018	0.634304	82.2	1.15527	10.024	0.61326	70.5333	1.45925	2.1362	0.694867
	mmu-miR-151-3p	15	73085271	-	CTAGACTGAGGCTCCTTGA	CTAGACTGAGGCTCCTTGAGG	mmu-miR-151-3p	8410.62	114.025	1336.33	3.678e-38	11995.2	142.893	1708.98	3.678e-38	7458.53	102.822	1195.17	3.678e-38
	mmu-miR-151-5p	15	73085306	-	TCGAGGAGCTCACAGTCTAG	TCGAGGAGCTCACAGTCTAGT	mmu-miR-151-5p	22998.8	280.452	344.468	3.678e-38	23838.5	285.43	362.57	3.678e-38	23252.5	279.91	139.257	3.678e-38
	mmu-miR-152	11	96711752	+	TCAGTGCATGACAGAACTT	TCAGTGCATGACAGAACTTGG	mmu-miR-152	14906.6	215.462	856.09	3.678e-38	13456.8	169.51	845.653	3.678e-38	16814	198.938	1055.36	3.678e-38
	mmu-miR-153	12	118489332	+	TTGCATAGTCACAAAAGTGA	TTGCATAGTCACAAAAGTGATC	mmu-miR-153	1766.5	32.5359	579.868	3.678e-38	431.1	10.9279	502.628	3.678e-38	3130.53	58.8622	2119.5	3.678e-38
	mmu-miR-154	12	110976647	+	TAGGTTATCCGTGTTGCCT	TAGGTTATCCGTGTTGCCTTCG	mmu-miR-154	2785.3	49.683	1102.88	3.678e-38	3785.1	59.3622	3048.48	3.678e-38	1844.2	29.6399	1073.69	3.678e-38
	mmu-miR-154*	12	110976683	+	AATCATACACGGTTGACCTAT	AATCATACACGGTTGACCTATT	mmu-miR-154*	123.975	2.5614	53.84	1.73292e-05	72.4667	1.11144	2.04042	0.742392	84	1.71537	25.9963	0.240125
	mmu-miR-155	16	84714387	+	TTAATGCTAATTGTGATAGGG	TTAATGCTAATTGTGATAGGGGT	mmu-miR-155	11952.8	155.407	834.692	3.678e-38	17015.4	211.109	1977.51	3.678e-38	11504.5	136.852	449.519	3.678e-38
	mmu-miR-15a	14	62250934	-	GCAGCACATAATGGTTTG	TAGCAGCACATAATGGTTTGTG	mmu-miR-15a	5225.45	81.143	493.583	3.678e-38	2567.3	44.7559	1126.05	3.678e-38	5352.47	89.1923	724.267	3.678e-38
	mmu-miR-15a*	14	62250897	-	AGGCCATACTGTGCTGC	CAGGCCATACTGTGCTGCCTCA	mmu-miR-15a*	206.5	8.20079	239.819	2.8277e-27	547.3	12.8424	760.332	3.678e-38	321.067	8.58148	292.01	3.678e-38
	mmu-miR-15b	3	68813696	+	GCAGCACATCATGGTTTA	TAGCAGCACATCATGGTTTACA	mmu-miR-15b	19791.6	240.669	982.403	3.678e-38	20664.3	255.913	490.145	3.678e-38	19476.1	239.03	416.537	3.678e-38
	mmu-miR-15b*	3	68813734	+	GAATCATTATTTGCTGCTCTA	CGAATCATTATTTGCTGCTCTA	mmu-miR-15b*	6950.95	100.294	416.197	3.678e-38	4684.03	84.8215	3905	3.678e-38	7304.8	100.773	682.727	3.678e-38
	mmu-miR-16	14,3	6225079568813830	-,+	AGCAGCACGTAAATATTGG	TAGCAGCACGTAAATATTGGCG	mmu-miR-16	21931.1	269.747	580.817	3.678e-38	15313.6	182.446	4498.77	3.678e-38	22097.3	255.648	990.933	3.678e-38
	mmu-miR-16*	14	62250753	-	AGTATTGACTGTGCTGCTGA	CCAGTATTGACTGTGCTGCTGA	mmu-miR-16*	277.075	5.68909	89.7113	3.678e-38	434.767	4.33786	67.6657	3.678e-38	313.433	6.53447	136.88	3.678e-38
	mmu-miR-17	14	115442905	+	AAAGTGCTTACAGTGCAGG	CAAAGTGCTTACAGTGCAGGTAG	mmu-miR-17	11966.2	162.338	283.563	3.678e-38	11882.1	136.981	526.288	3.678e-38	12066.7	146.276	356.177	3.678e-38
	mmu-miR-17*	14	115442942	+	ACTGCAGTGAGGGCACTT	ACTGCAGTGAGGGCACTTGTAG	mmu-miR-17*	2777.53	48.6436	425.561	3.678e-38	3843.23	52.4027	1504.38	3.678e-38	2690.73	40.2211	399.883	3.678e-38
	mmu-miR-181a	1,2	1.39863e+16	+,+	ATTCAACGCTGTCGGTGA	AACATTCAACGCTGTCGGTGAGT	mmu-miR-181a	16246	214.701	373.699	3.678e-38	12853.7	162.954	1286.75	3.678e-38	15432.1	197.93	182.594	3.678e-38
	mmu-miR-181a-1*	1	139863084	+	CATCGACCGTTGATTGTA	ACCATCGACCGTTGATTGTACC	mmu-miR-181a-1*	1559.33	30.4522	270.224	3.678e-38	335.633	10.5529	463.381	3.678e-38	1028.8	20.5669	421.023	3.678e-38
	mmu-miR-181a-2*	2	38708307	+	CGACCGTTGACTGTACCT	ACCGACCGTTGACTGTACCTTG	mmu-miR-181a-2*	1343.95	24.7522	85.3762	3.678e-38	2776.97	41.1676	2400.89	3.678e-38	1124.33	17.4934	465.597	3.678e-38
	mmu-miR-181b	2,1	3.87094e+16	+,+	ATTCATTGCTGTCGGTGG	AACATTCATTGCTGTCGGTGGGT	mmu-miR-181b	14345.8	191.188	1759.29	3.678e-38	15687.8	196.381	620.938	3.678e-38	12150.1	140.321	823.712	3.678e-38
	mmu-miR-181c	8	86702845	-	AACATTCAACCTGTCGGT	AACATTCAACCTGTCGGTGAGT	mmu-miR-181c	822.825	16.9069	62.0404	3.678e-38	457.967	6.12356	448.411	3.678e-38	800.2	18.2152	696.783	3.678e-38
	mmu-miR-181d	8	86702681	-	AACATTCATTGTTGTCG	AACATTCATTGTTGTCGGTGGGT	mmu-miR-181d	145.875	3.71708	74.1732	2.03179e-10	259.5	6.96452	245.092	4.41078e-26	124.5	2.54373	43.2711	2.10008e-05
	mmu-miR-182	6	30115987	-	TTTGGCAATGGTAGAACTC	TTTGGCAATGGTAGAACTCACACCG	mmu-miR-182	133.1	2.89099	40.1373	6.76907e-07	105.6	1.24144	10.3087	0.216767	153.867	2.68085	97.7246	1.32693e-13
	mmu-miR-183	6	30119733	-	ATGGCACTGGTAGAATTCA	TATGGCACTGGTAGAATTCACT	mmu-miR-183	240.175	5.46486	206.931	3.678e-38	801.867	10.8601	531.074	3.678e-38	164.033	2.48551	88.2737	3.59951e-16
	mmu-miR-183*	6	30119694	-	ATTACCGAAGGGCCATA	GTGAATTACCGAAGGGCCATAA	mmu-miR-183*	103.7	2.16387	4.18649	0.013991	112.233	1.2467	11.1294	0.1396	106.8	1.81821	2.98161	0.00372955
	mmu-miR-184	9	89697123	-	TGGACGGAGAACTGATAAG	TGGACGGAGAACTGATAAGGGT	mmu-miR-184	1001.52	23.6953	774.822	3.678e-38	3147.6	46.2573	947.949	3.678e-38	1807.17	28.1461	245.733	3.678e-38
	mmu-miR-185	16	18327553	-	TGGAGAGAAAGGCAGTTC	TGGAGAGAAAGGCAGTTCCTGA	mmu-miR-185	9297.92	127.014	158.505	3.678e-38	9003.8	117.266	1466.14	3.678e-38	8262.93	108.936	593.377	3.678e-38
	mmu-miR-186	3	157207248	+	CAAAGAATTCTCCTTTTGG	CAAAGAATTCTCCTTTTGGGCT	mmu-miR-186	2509.25	41.1866	166.286	3.678e-38	464.233	13.878	606.703	3.678e-38	2355.87	36.8969	423.802	3.678e-38
	mmu-miR-186*	3	157207287	+	GCCCTAAGGTGAATTTTTT	GCCCTAAGGTGAATTTTTTGGG	mmu-miR-186*	87.5	1.85081	2.76526	0.181581	128.967	1.36674	39.1084	0.0609066	88.5	1.49159	0.34641	0.143093
	mmu-miR-187	18	24587633	-	TCGTGTCTTGTGTTGCAG	TCGTGTCTTGTGTTGCAGCCGG	mmu-miR-187	2424.9	42.9054	310.102	3.678e-38	866.367	15.2232	723.573	3.678e-38	2181.9	32.9005	299.414	3.678e-38
	mmu-miR-188-3p	X	6825139	-	CCACATGCAGGGTTTG	CTCCCACATGCAGGGTTTGCA	mmu-miR-188-3p	67.7	1.67039	0.637704	0.737867	72.1667	1.07558	2.2053	0.744602	69.3	1.42801	1.49332	0.733251
	mmu-miR-188-5p	X	6825178	-	ATCCCTTGCATGGTGGAG	CATCCCTTGCATGGTGGAGGG	mmu-miR-188-5p	787.275	16.222	249.635	3.678e-38	371.167	5.50045	91.9513	3.678e-38	609.9	10.2768	201.497	3.678e-38
	mmu-miR-18a	14	115443088	+	TAAGGTGCATCTAGTGCAGA	TAAGGTGCATCTAGTGCAGATAG	mmu-miR-18a	3792.53	58.2652	241.093	3.678e-38	3487.5	42.7553	1066.7	3.678e-38	3601.73	55.4621	184.723	3.678e-38
	mmu-miR-18a*	14	115443129	+	CTGCCCTAAGTGCTCCTTC	ACTGCCCTAAGTGCTCCTTCTG	mmu-miR-18a*	544.6	12.5965	382.382	3.678e-38	731.533	11.3516	507.717	3.678e-38	671.4	14.0293	509.349	3.678e-38
	mmu-miR-18b	X	50095581	-	TAAGGTGCATCTAGTGCTGT	TAAGGTGCATCTAGTGCTGTTAG	mmu-miR-18b	129.95	3.23371	86.0045	2.72503e-07	204.333	2.29007	214.727	1.26768e-06	280.533	6.49364	329.645	3.678e-38
	mmu-miR-190	9	67084529	-	TGATATGTTTGATATATTAGGT	TGATATGTTTGATATATTAGGT	mmu-miR-190	6630.82	99.6926	702.369	3.678e-38	2713.73	47.9038	2152.59	3.678e-38	5399.5	89.4398	1052.84	3.678e-38
	mmu-miR-190b	3	89873951	+	TGATATGTTTGATATTGGGTT	TGATATGTTTGATATTGGGTT	mmu-miR-190b	804.425	17.3967	495.877	3.678e-38	724.567	20.9902	1042.13	3.678e-38	315.167	5.26252	137.601	3.678e-38
	mmu-miR-191	9	108470655	+	AACGGAATCCCAAAAGCA	CAACGGAATCCCAAAAGCAGCTG	mmu-miR-191	25492.2	301.323	65.65	3.678e-38	25759	312.059	443.658	3.678e-38	25692.8	288.305	202.13	3.678e-38
	mmu-miR-191*	9	108470697	+	CTGCACTTGGATTTCGTT	GCTGCACTTGGATTTCGTTCCC	mmu-miR-191*	1308.72	23.8464	411.346	3.678e-38	500.633	7.07763	126.757	3.678e-38	1165.43	17.7735	591.606	3.678e-38
	mmu-miR-192	19	6264856	+	CTGACCTATGAATTGACA	CTGACCTATGAATTGACAGCC	mmu-miR-192	4274.2	71.3175	736.121	3.678e-38	3907.67	52.6439	1638.97	3.678e-38	4049	64.057	795.519	3.678e-38
	mmu-miR-193	11	79525510	+	CTGGCCTACAAAGTCCCA	AACTGGCCTACAAAGTCCCAGT	mmu-miR-193	3581.15	56.8245	483.776	3.678e-38	6485.4	86.8864	1427.83	3.678e-38	4275.13	67.711	280.703	3.678e-38
	mmu-miR-193*	11	79525476	+	TCTTTGCGGGCAAGAT	TGGGTCTTTGCGGGCAAGATGA	mmu-miR-193*	4162.25	74.6433	965.223	3.678e-38	5326.4	75.7928	226.27	3.678e-38	3502.8	59.476	546.391	3.678e-38
	mmu-miR-193b	16	13449662	+	TGGCCCACAAAGTCCCG	AACTGGCCCACAAAGTCCCGCT	mmu-miR-193b	6318.2	100.611	383.957	3.678e-38	5448.3	79.6299	2006.27	3.678e-38	6098.8	89.854	1183.72	3.678e-38
	mmu-miR-194	19,1	6264657187137200	+,+	GTAACAGCAACTCCATGTG	TGTAACAGCAACTCCATGTGGA	mmu-miR-194	2319.25	45.1964	384.301	3.678e-38	2351.33	35.7392	264.146	3.678e-38	1972.47	35.9614	713.205	3.678e-38
	mmu-miR-195	11	70048563	+	AGCAGCACAGAAATATTGG	TAGCAGCACAGAAATATTGGC	mmu-miR-195	16054.1	220.344	1120.92	3.678e-38	12000.7	170.498	1721.39	3.678e-38	18052.3	215.401	1484.79	3.678e-38
	mmu-miR-196a	15,11	1.02804e+16	+,+	TAGGTAGTTTCATGTTGTTGG	TAGGTAGTTTCATGTTGTTGGG	mmu-miR-196a	1432.17	30.6699	950.858	3.678e-38	3323.9	47.8885	742.014	3.678e-38	1445.3	22.4185	191.419	3.678e-38
	mmu-miR-196a*	15	102803831	+	TCGGCAACAAGAAACTG	TCGGCAACAAGAAACTGCCTGA	mmu-miR-196a*	114.6	2.26352	16.8768	0.00164369	195.767	1.8531	79.6003	3.58145e-06	113.067	1.84391	5.21664	0.000557337
	mmu-miR-196b	6	52180150	-	TAGGTAGTTTCCTGTTGTTG	TAGGTAGTTTCCTGTTGTTGGG	mmu-miR-196b	1235.6	24.219	346.792	3.678e-38	3736.9	51.0249	1074.62	3.678e-38	1541.7	24.042	548.957	3.678e-38
	mmu-miR-197	0	0	+	TCACCACCTTCTCCACC	TTCACCACCTTCTCCACCCAGC	mmu-miR-197	83.35	1.98475	2.52785	0.285271	96.4	1.19749	12.7672	0.371194	87.7333	1.70275	7.21411	0.170612
	mmu-miR-199a-3p,mmu-miR-199b	1,9,2	1.64148e+24	+,-,+	CAGTAGTCTGCACATTGGTTA	ACAGTAGTCTGCACATTGGTTA,ACAGTAGTCTGCACATTGGTTA	mmu-miR-199a-3p,mmu-miR-199b	19116.7	271.004	598.96	3.678e-38	21491	293.153	430.102	3.678e-38	20894.1	284.744	619.651	3.678e-38
	mmu-miR-199a-3p:9.1	0	0	+	TACAGTAGTCTGCACATTGG	TACAGTAGTCTGCACATTGGTT	mmu-miR-199a-3p:9.1	12380.3	172.72	548.931	3.678e-38	13362.1	188.143	3135.37	3.678e-38	16766.6	215.399	1137.16	3.678e-38
	mmu-miR-199a-5p	1,9	1.64148e+16	+,-	CCCAGTGTTCAGACTACCT	CCCAGTGTTCAGACTACCTGTTC	mmu-miR-199a-5p	7867.32	115.481	991.386	3.678e-38	9771.4	131.661	938.425	3.678e-38	11159.2	138.791	996.932	3.678e-38
	mmu-miR-199b*	2	32174004	+	CCCAGTGTTTAGACTACCTGT	CCCAGTGTTTAGACTACCTGTTC	mmu-miR-199b*	7043.18	110.515	1462.77	3.678e-38	6831.1	91.4232	432.624	3.678e-38	10054.9	128.163	296.067	3.678e-38
	mmu-miR-19a	14	115443269	+	TGTGCAAATCTATGCAAAAC	TGTGCAAATCTATGCAAAACTGA	mmu-miR-19a	688.6	15.582	403.034	3.678e-38	274.533	3.45541	27.5507	4.59151e-18	390.167	8.34736	330.024	3.678e-38
	mmu-miR-19a*	14	115443233	+	TAGTTTTGCATAGTTGCACTAC	TAGTTTTGCATAGTTGCACTAC	mmu-miR-19a*	100.95	2.06108	8.96307	0.0288293	154.933	1.48104	53.067	0.00434954	321.567	5.48462	268.199	3.678e-38
	mmu-miR-19b	14,X	1.15444e+16	+,-	TGCAAATCCATGCAAAAC	TGTGCAAATCCATGCAAAACTGA	mmu-miR-19b	1038	20.6242	472.894	3.678e-38	1267.43	16.7459	337.56	3.678e-38	1404.8	21.2941	259.394	3.678e-38
	mmu-miR-200a	4	155429042	-	ACACTGTCTGGTAACGATGT	TAACACTGTCTGGTAACGATGT	mmu-miR-200a	237.925	4.95934	135.665	4.48052e-32	94.5667	1.69003	54.8	0.166062	450.9	13.5705	574.655	3.678e-38
	mmu-miR-200a*	4	155429080	-	TACCGGACAGTGCTGG	CATCTTACCGGACAGTGCTGGA	mmu-miR-200a*	72.55	1.74699	1.50665	0.605915	86.5333	1.20402	8.05874	0.527343	74.8	1.45207	1.58745	0.558554
	mmu-miR-200b	4	155429816	-	TACTGCCTGGTAATGATGA	TAATACTGCCTGGTAATGATGA	mmu-miR-200b	1331.5	22.561	225.595	3.678e-38	1123.87	17.3669	431.159	3.678e-38	1407.33	20.0647	20.7996	3.678e-38
	mmu-miR-200b*	4	155429852	-	CATCTTACTGGGCAGCAT	CATCTTACTGGGCAGCATTGGA	mmu-miR-200b*	220.65	4.308	8.12178	1.47194e-30	350.133	3.2447	106.005	1.22491e-28	189.533	3.22531	19.4582	3.27351e-23
	mmu-miR-200c	6	124668365	-	ACTGCCGGGTAATGATGG	TAATACTGCCGGGTAATGATGGA	mmu-miR-200c	2648.47	44.7078	750.321	3.678e-38	3504.1	47.4447	1110.92	3.678e-38	1916.93	28.5727	631.313	3.678e-38
	mmu-miR-200c*	6	124668405	-	TCTTACCCAGCAGTGTTTG	CGTCTTACCCAGCAGTGTTTGG	mmu-miR-200c*	92.475	2.15548	2.29982	0.0972901	149.3	2.4205	62.9048	0.00016539	97.0333	2.11376	12.8001	0.0303302
	mmu-miR-201	X	65241332	-	TACTCAGTAAGGCATTGTTCT	TACTCAGTAAGGCATTGTTCTT	mmu-miR-201	2002.5	35.572	201.655	3.678e-38	1553	29.9629	1274.47	3.678e-38	4768.5	74.3685	541.777	3.678e-38
	mmu-miR-202-3p	7	147143616	-	AGGTATAGCGCATGGGAA	AGAGGTATAGCGCATGGGAAGA	mmu-miR-202-3p	86.75	1.88154	3.9745	0.187709	89.6	1.18487	5.57494	0.458646	87.3	1.57513	0.3	0.169239
	mmu-miR-202-5p	7	147143652	-	TTCCTATGCATATACTTCTTT	TTCCTATGCATATACTTCTTT	mmu-miR-202-5p	76.975	1.72922	8.00432	0.440193	70.2667	1.06948	3.24705	0.77472	76.4333	1.56556	5.8731	0.511985
	mmu-miR-203	12	113369137	+	TGAAATGTTTAGGACCACTAG	GTGAAATGTTTAGGACCACTAG	mmu-miR-203	9268.85	128.327	361.337	3.678e-38	4626.43	83.2016	2848.98	3.678e-38	7938.97	108.104	1505.34	3.678e-38
	mmu-miR-203*	12	113369099	+	AGTGGTTCTTGACAGTTCAAC	AGTGGTTCTTGACAGTTCAACA	mmu-miR-203*	112.2	2.89252	63.3695	0.000269298	110.833	1.22608	67.5226	0.272386	113.667	2.40968	39.5582	0.000342566
	mmu-miR-204	19	22825099	+	TTCCCTTTGTCATCCTATG	TTCCCTTTGTCATCCTATGCCT	mmu-miR-204	6516.15	99.3904	443.09	3.678e-38	3862.43	64.9283	3202.05	3.678e-38	6559.5	101.122	562.286	3.678e-38
	mmu-miR-205	1	195333719	-	CCTTCATTCCACCGGAGT	TCCTTCATTCCACCGGAGTCTG	mmu-miR-205	154.55	3.68263	96.7259	1.2697e-11	76.6667	1.11613	2.98385	0.67326	75.7	1.5618	3.48712	0.5335
	mmu-miR-206	1	20669135	+	TGGAATGTAAGGAAGTGTGT	TGGAATGTAAGGAAGTGTGTGG	mmu-miR-206	735.975	16.437	800.24	3.678e-38	2804.77	46.9411	950.243	3.678e-38	1576.97	28.756	136.888	3.678e-38
	mmu-miR-207	4	40670000	+	CTTCTCCTGGCTCTCCTC	GCTTCTCCTGGCTCTCCTCCCTC	mmu-miR-207	109.15	2.29556	15.5432	0.00292163	637	17.9579	900.6	3.678e-38	108.967	1.76569	18.8877	0.00278422
	mmu-miR-208a	14	55567931	-	ATAAGACGAGCAAAAAGCTT	ATAAGACGAGCAAAAAGCTTGT	mmu-miR-208a	4235.38	65.2642	489.289	3.678e-38	2477.1	42.7559	1573.16	3.678e-38	4398.37	75.1247	410.433	3.678e-38
	mmu-miR-208b	14	55594569	-	ATAAGACGAACAAAAG	ATAAGACGAACAAAAGGTTTGT	mmu-miR-208b	149.775	3.94546	64.4925	2.48419e-09	195.333	1.86435	56.7412	5.59746e-06	114.3	2.3077	2.25167	0.000413965
	mmu-miR-20a	14	115443404	+	AAAGTGCTTATAGTGCAGGT	TAAAGTGCTTATAGTGCAGGTAG	mmu-miR-20a	10990	139.772	588.342	3.678e-38	9053.1	124.238	1523.87	3.678e-38	11211.3	139.309	119.223	3.678e-38
	mmu-miR-20a*	14	115443440	+	CTGCATTACGAGCACTTAAA	ACTGCATTACGAGCACTTAAAG	mmu-miR-20a*	5344.23	81.1721	334.705	3.678e-38	8253.33	110.758	1228.19	3.678e-38	5760.4	90.6685	1862.85	3.678e-38
	mmu-miR-20b	X	50095359	-	AAAGTGCTCATAGTGCAGG	CAAAGTGCTCATAGTGCAGGTAG	mmu-miR-20b	1035.03	20.7303	378.691	3.678e-38	1846.83	33.1077	1600.72	3.678e-38	536.467	10.2704	337.649	3.678e-38
	mmu-miR-20b*	X	50095321	-	TGCAGTGTGAGCACTTCTA	ACTGCAGTGTGAGCACTTCTAG	mmu-miR-20b*	265.4	7.46239	230.031	3.678e-38	228.633	3.4076	128.359	1.69205e-14	82.1	1.74259	21.4812	0.298193
	mmu-miR-21	11	86397644	-	TAGCTTATCAGACTGATGTTG	TAGCTTATCAGACTGATGTTGA	mmu-miR-21	23005	271.96	678.134	3.678e-38	23522.9	292.772	189.775	3.678e-38	23018.5	271.757	953.098	3.678e-38
	mmu-miR-21*	11	86397606	-	CAGTCGATGGGCTGTC	CAACAGCAGTCGATGGGCTGTC	mmu-miR-21*	123.625	2.78001	68.8046	7.28377e-06	119	1.3528	24.6976	0.0895657	140.4	3.22288	84.432	3.96146e-09
	mmu-miR-210	7	148407328	-	CTGTGCGTGTGACAGCGG	CTGTGCGTGTGACAGCGGCTGA	mmu-miR-210	3853.32	63.2512	505.573	3.678e-38	4591.73	63.1935	323.633	3.678e-38	3280.8	54.7642	1252.81	3.678e-38
	mmu-miR-211	7	71350716	+	TCCCTTTGTCATCCTTTG	TTCCCTTTGTCATCCTTTGCCT	mmu-miR-211	327.85	6.55579	192.665	3.678e-38	404.633	4.62813	66.7683	3.678e-38	235.867	4.04582	19.1113	3.678e-38
	mmu-miR-212	11	74986944	+	AACAGTCTCCAGTCACGG	TAACAGTCTCCAGTCACGGCCA	mmu-miR-212	4920.73	79.0538	319.514	3.678e-38	7427.73	103.504	999.483	3.678e-38	4893.9	75.755	282.324	3.678e-38
	mmu-miR-214	1	164153568	+	ACAGCAGGCACAGACAGG	ACAGCAGGCACAGACAGGCAGT	mmu-miR-214	14577.8	193.744	1139.5	3.678e-38	21685.4	257.074	1548.4	3.678e-38	18413.8	219.083	1431.6	3.678e-38
	mmu-miR-214*	1	164153527	+	GCCTGTCTACACTTGCTGT	TGCCTGTCTACACTTGCTGTGC	mmu-miR-214*	2119.88	39.1629	402.866	3.678e-38	1489.1	25.5371	1021.5	3.678e-38	2724.67	42.8082	410.278	3.678e-38
	mmu-miR-215	1	187137488	+	ATGACCTATGATTTGACAGAC	ATGACCTATGATTTGACAGAC	mmu-miR-215	5987.65	92.934	1332.36	3.678e-38	4945.73	76.5917	3840.14	3.678e-38	3137.8	52.0371	497.882	3.678e-38
	mmu-miR-216a	11	28657017	+	AATCTCAGCTGGCAACTG	TAATCTCAGCTGGCAACTGTGA	mmu-miR-216a	186.125	5.60794	219.547	1.00778e-17	94.7	1.13529	14.6264	0.408541	75.4	1.52066	2.94449	0.529071
	mmu-miR-216b	11	28646203	+	AAATCTCTGCAGGCAAAT	AAATCTCTGCAGGCAAATGTGA	mmu-miR-216b	151.45	3.06818	18.1851	4.13075e-09	258.867	2.32435	88.8888	1.14989e-12	145.033	2.53111	2.93995	6.77318e-10
	mmu-miR-217	11	28663760	+	ACTGCATCAGGAACTGACT	TACTGCATCAGGAACTGACTGGA	mmu-miR-217	146	3.19374	46.5998	1.83374e-09	119.933	1.39888	4.89115	0.0555368	281.767	5.78493	313.618	3.678e-38
	mmu-miR-218	5,11	4861520435430340	+,+	TTGTGCTTGATCTAACCAT	TTGTGCTTGATCTAACCATGT	mmu-miR-218	10055	133.72	205.276	3.678e-38	8689.2	113.787	825.615	3.678e-38	9222.73	124.121	559.45	3.678e-38
	mmu-miR-218-1*	5	48615243	+	AAACATGGTTCCGTCAA	AAACATGGTTCCGTCAAGCACC	mmu-miR-218-1*	75	1.76402	2.00167	0.533894	80.1333	1.13529	4.05504	0.621153	75.1333	1.48368	1.32035	0.547011
	mmu-miR-218-2*	11	35430383	+	TTCTGTCAAGCACCGC	CATGGTTCTGTCAAGCACCGCG	mmu-miR-218-2*	146.675	3.03315	27.0724	6.09193e-08	231.033	2.33669	60.1774	1.02778e-09	199.6	4.40053	95.7975	2.64214e-28
	mmu-miR-219	17,2	3416201829701230	-,-	TGATTGTCCAAACGCAAT	TGATTGTCCAAACGCAATTCT	mmu-miR-219	199.825	4.38916	32.5205	1.58379e-22	256.233	2.3523	83.2274	2.19703e-12	450.933	8.42258	241.588	3.678e-38
	mmu-miR-22	11	75277273	+	AAGCTGCCAGTTGAAGAA	AAGCTGCCAGTTGAAGAACTGT	mmu-miR-22	24282.4	285.38	643.229	3.678e-38	23035.5	278	236.54	3.678e-38	23809.2	273.56	1081.97	3.678e-38
	mmu-miR-22*	11	75277235	+	TCTTCAGTGGCAAGCTTTA	AGTTCTTCAGTGGCAAGCTTTA	mmu-miR-22*	16378.9	213.191	1069.2	3.678e-38	10713.4	142.634	900.853	3.678e-38	16204.6	199.746	132.306	3.678e-38
	mmu-miR-220	6	136349022	-	CACCACAGTGTCAGACACTT	CCACCACAGTGTCAGACACTT	mmu-miR-220	68.725	1.77482	2.49048	0.712022	75.9333	1.04912	8.51724	0.711696	73.1	1.56012	8.83572	0.608266
	mmu-miR-221	X	18723456	-	CTACATTGTCTGCTGGGT	AGCTACATTGTCTGCTGGGTTTC	mmu-miR-221	5945.1	88.2131	389.376	3.678e-38	5685	80.5666	881.189	3.678e-38	7402.3	92.0018	802.319	3.678e-38
	mmu-miR-222	X	18724050	-	AGCTACATCTGGCTACTGG	AGCTACATCTGGCTACTGGGT	mmu-miR-222	6095.6	89.4483	264.309	3.678e-38	6712.83	91.2432	708.995	3.678e-38	6837.13	98.9785	261.38	3.678e-38
	mmu-miR-223	X	93438222	+	TGTCAGTTTGTCAAATACCC	TGTCAGTTTGTCAAATACCCCA	mmu-miR-223	16119.8	216.373	2699.09	3.678e-38	12124.9	141.812	442.085	3.678e-38	14983.8	175.583	339.443	3.678e-38
	mmu-miR-224	X	69506445	-	AAGTCACTAGTGGTTCCGT	TAAGTCACTAGTGGTTCCGTT	mmu-miR-224	1665.78	37.8097	421.928	3.678e-38	2605.03	58.8446	2291.74	3.678e-38	2454.17	45.863	1641.7	3.678e-38
	mmu-miR-23a	8	86732461	+	TCACATTGCCAGGGATTT	ATCACATTGCCAGGGATTTCC	mmu-miR-23a	19977.7	251.065	548.258	3.678e-38	20421.2	245.693	1298.47	3.678e-38	20267.9	244.429	719.459	3.678e-38
	mmu-miR-23b	13	63401836	+	TCACATTGCCAGGGATTA	ATCACATTGCCAGGGATTACC	mmu-miR-23b	26190.2	300.966	323.464	3.678e-38	27171.7	295.278	1373.91	3.678e-38	25980.4	282.934	337.519	3.678e-38
	mmu-miR-24	13,8	6340255886732770	+,+	GGCTCAGTTCAGCAGGAA	TGGCTCAGTTCAGCAGGAACAG	mmu-miR-24	25200	294.106	184.55	3.678e-38	25324.4	304.916	353.626	3.678e-38	25564.2	289.512	259.619	3.678e-38
	mmu-miR-24-1*	13	63402520	+	CTACTGAGCTGATATCAGT	GTGCCTACTGAGCTGATATCAGT	mmu-miR-24-1*	1981.7	36.3986	806.254	3.678e-38	1929.33	30.491	723.114	3.678e-38	2771.63	51.2178	1753.42	3.678e-38
	mmu-miR-24-2*	8	86732737	+	GTGCCTACTGAGCTGAAAC	GTGCCTACTGAGCTGAAACAGT	mmu-miR-24-2*	7101.32	99.7038	616.432	3.678e-38	4872.93	73.9507	1897.62	3.678e-38	6769.83	95.6906	1216.7	3.678e-38
	mmu-miR-25	5	138606582	-	ATTGCACTTGTCTCGGTC	CATTGCACTTGTCTCGGTCTGA	mmu-miR-25	13924.4	185.353	2291.53	3.678e-38	16479.6	223.918	2442.74	3.678e-38	13283.1	166.5	1036.95	3.678e-38
	mmu-miR-26a	10,9	1.26433e+17	+,+	CAAGTAATCCAGGATAGGC	TTCAAGTAATCCAGGATAGGCT	mmu-miR-26a	25645.4	307.988	109.4	3.678e-38	24775.8	293.778	603.792	3.678e-38	25348	300.614	96.4752	3.678e-38
	mmu-miR-26b	1	74440897	+	TTCAAGTAATTCAGGATAGGT	TTCAAGTAATTCAGGATAGGT	mmu-miR-26b	20078	252.205	378.981	3.678e-38	20361.6	269.241	623.712	3.678e-38	19641.4	260.005	0	3.678e-38
	mmu-miR-26b*	1	74440933	+	CTGTTCTCCATTACTTGGCT	CCTGTTCTCCATTACTTGGCTC	mmu-miR-26b*	2971.72	54.5844	426.551	3.678e-38	1802.27	35.8934	1272.09	3.678e-38	2557.13	37.555	316.259	3.678e-38
	mmu-miR-27a	8	86732625	+	TTCACAGTGGCTAAGTTCC	TTCACAGTGGCTAAGTTCCGC	mmu-miR-27a	22488.3	278.676	228.648	3.678e-38	22516.2	275.543	369	3.678e-38	22640.4	277.437	105.655	3.678e-38
	mmu-miR-27a*	8	86732583	+	GGCTTAGCTGCTTGTGAG	AGGGCTTAGCTGCTTGTGAGCA	mmu-miR-27a*	927.7	17.6872	221.829	3.678e-38	637.333	10.1258	278.716	3.678e-38	1003.2	16.9477	292.322	3.678e-38
	mmu-miR-27b	13	63402067	+	TTCACAGTGGCTAAGTTCT	TTCACAGTGGCTAAGTTCTGC	mmu-miR-27b	20668.2	264.539	342.494	3.678e-38	21874.2	256.696	234.982	3.678e-38	21098.4	258.503	407.602	3.678e-38
	mmu-miR-27b*	13	63402025	+	AGCTTAGCTGATTGGTGAAC	AGAGCTTAGCTGATTGGTGAAC	mmu-miR-27b*	6144.98	94.8563	91.7131	3.678e-38	8254.27	108.071	1065.16	3.678e-38	7202.03	105.434	583.821	3.678e-38
	mmu-miR-28	16	24827953	+	AAGGAGCTCACAGTCTATTG	AAGGAGCTCACAGTCTATTGAG	mmu-miR-28	13908	184.095	776.862	3.678e-38	13007.2	155.262	589.122	3.678e-38	14726.7	181.311	1119.66	3.678e-38
	mmu-miR-28*	16	24827993	+	AGATTGTGAGCTGCTGGA	CACTAGATTGTGAGCTGCTGGA	mmu-miR-28*	5879.68	86.5148	988.439	3.678e-38	8045.57	108.849	668.444	3.678e-38	5563.87	87.0706	587.872	3.678e-38
	mmu-miR-290-3p	7	3218674	+	GCCGCCTAGTTTTAAGC	AAAGTGCCGCCTAGTTTTAAGCCC	mmu-miR-290-3p	65.8	1.58269	1.73782	0.790027	340.733	11.9596	466.5	3.678e-38	65.2	1.32793	1.253	0.840887
	mmu-miR-290-5p	7	3218639	+	AAACTATGGGGGCACTTT	ACTCAAACTATGGGGGCACTTT	mmu-miR-290-5p	109.025	2.30685	7.84023	0.00563147	251.967	5.07383	140.078	7.31233e-20	111.633	2.00978	3.91067	0.00103241
	mmu-miR-291a-3p	7	3218968	+	AAGTGCTTCCACTTTGTGT	AAAGTGCTTCCACTTTGTGTGC	mmu-miR-291a-3p	198.8	3.82996	18.5021	6.59278e-22	272.567	2.35036	59.8188	1.12099e-15	186.967	3.27418	9.74491	1.05132e-22
	mmu-miR-291a-5p	7	3218932	+	AAGTGGAGGCCCTCTCT	CATCAAAGTGGAGGCCCTCTCT	mmu-miR-291a-5p	70.225	1.63119	1.78769	0.668495	112.767	2.00718	59.6994	0.0311153	72.4	1.4068	1.37477	0.642028
	mmu-miR-291b-3p	7	3219529	+	AAGTGCATCCATTTTGTTT	AAAGTGCATCCATTTTGTTTGT	mmu-miR-291b-3p	186.775	3.57373	76.1673	2.87532e-16	344.2	2.76628	210.127	7.81709e-22	153.433	2.45509	26.9021	2.00238e-12
	mmu-miR-291b-5p	7	3219494	+	GATCAAAGTGGAGGCCCT	GATCAAAGTGGAGGCCCTCTCC	mmu-miR-291b-5p	157.55	3.41838	44.4526	1.82521e-11	100	1.24144	18.4762	0.314158	87.0667	1.58135	6.52559	0.183149
	mmu-miR-292-3p	7	3219238	+	AAGTGCCGCCAGGTTTT	AAAGTGCCGCCAGGTTTTGAGTGT	mmu-miR-292-3p	74.5	1.73431	1.81659	0.543876	86.0333	1.17379	7.41103	0.53465	77.1	1.46462	1.15326	0.47639
	mmu-miR-292-5p	7	3219200	+	AAACTGGGGGCTCTTTT	ACTCAAACTGGGGGCTCTTTTG	mmu-miR-292-5p	116.85	2.83172	82.6129	0.00639445	316.267	3.92495	433.475	2.75732e-13	132.433	2.29065	60.5161	2.5445e-06
	mmu-miR-293	7	3220390	+	TGCCGCAGAGTTTGTAG	AGTGCCGCAGAGTTTGTAGTGT	mmu-miR-293	442.3	9.07997	53.2144	3.678e-38	834.467	10.08	207.173	3.678e-38	598.6	8.49737	10.0135	3.678e-38
	mmu-miR-293*	7	3220356	+	CTCAAACTGTGTGACATTTTG	ACTCAAACTGTGTGACATTTTG	mmu-miR-293*	501.85	11.0572	267.312	3.678e-38	406.567	8.03115	238.391	3.678e-38	514.333	12.7677	437.467	3.678e-38
	mmu-miR-294	7	3220691	+	AAGTGCTTCCCTTTTGTG	AAAGTGCTTCCCTTTTGTGTGT	mmu-miR-294	89.175	1.90793	7.00303	0.163222	109.6	1.32695	12.7812	0.170835	85.0333	1.55551	1.70978	0.221669
	mmu-miR-294*	7	3220655	+	TCAAAATGGAGGCCCTA	ACTCAAAATGGAGGCCCTATCT	mmu-miR-294*	314.475	7.59334	450.888	3.678e-38	364.3	10.5973	413.473	3.678e-38	282.233	7.28738	332.698	3.678e-38
	mmu-miR-295	7	3220815	+	AAAGTGCTACTACTTTTGAGTCT	AAAGTGCTACTACTTTTGAGTCT	mmu-miR-295	150.95	3.12077	58.6882	1.61561e-10	111.8	1.40819	13.1533	0.0926603	108.067	1.93286	8.75119	0.00310697
	mmu-miR-295*	7	3220779	+	AAATGTGGGGCACACTT	ACTCAAATGTGGGGCACACTTC	mmu-miR-295*	645.95	13.5843	203.108	3.678e-38	2952.4	47.6541	2624.29	3.678e-38	513.467	8.46531	51.6032	3.678e-38
	mmu-miR-296-3p	2	174092581	-	TGGGTGGAGGCTCTCC	GAGGGTTGGGTGGAGGCTCTCC	mmu-miR-296-3p	165.1	3.71312	137.427	4.3179e-12	1185.23	17.3196	205.528	3.678e-38	409.467	11.2299	482.668	3.678e-38
	mmu-miR-296-5p	2	174092615	-	AGGGCCCCCCCTCAATCC	AGGGCCCCCCCTCAATCCTGT	mmu-miR-296-5p	389.325	8.00502	113.309	3.678e-38	1106.63	18.3301	1160.62	3.678e-38	681.6	11.6759	188.668	3.678e-38
	mmu-miR-297a	2,2,7,10,2,2	1.03939e+48	+,+,-,+,-,+	ATGTATGTGTGCATGTGC	ATGTATGTGTGCATGTGCATGT	mmu-miR-297a	1284.42	26.3129	142.733	3.678e-38	1424.87	24.953	219.322	3.678e-38	1398.5	25.8171	109.554	3.678e-38
	mmu-miR-297b-5p	2	10433312	+	ATGTATGTGTGCATGAACAT	ATGTATGTGTGCATGAACATGT	mmu-miR-297b-5p	117.7	2.50039	44.2691	0.000691853	122.3	1.66823	20.6826	0.0303648	91.9667	1.61123	1.15902	0.0841632
	mmu-miR-297c	2	10430652	+	TGTATGTGTGCATGTAC	ATGTATGTGTGCATGTACATGT	mmu-miR-297c	448.425	9.84064	277.888	3.678e-38	218.133	5.94297	243.499	1.86082e-18	307.767	6.12954	393.863	3.678e-38
	mmu-miR-297c*,mmu-miR-297a*,mmu-miR-297b-3p	2,2,2,2	1.04307e+31	+,+,+,+	TATACATACACACATACCC	TATACATACACACATACCCATA,TATACATACACACATACCCATA,TATACATACACACATACCCATA	mmu-miR-297c*,mmu-miR-297a*,mmu-miR-297b-3p	563.875	11.6722	379.761	3.678e-38	2498.47	34.7251	1311.23	3.678e-38	928.467	15.6881	229.227	3.678e-38
	mmu-miR-298	2	174093077	-	CAGAGGAGGGCTGTTCT	GGCAGAGGAGGGCTGTTCTTCCC	mmu-miR-298	127.425	2.82825	52.1205	1.74626e-05	1326.7	19.0817	258.591	3.678e-38	270.8	3.75926	182.94	3.678e-38
	mmu-miR-299	12	110948885	+	GGACGGTAAACCGCTT	TATGTGGGACGGTAAACCGCTT	mmu-miR-299	200.4	4.05574	77.9655	9.55546e-26	229.167	2.04076	89.2427	7.42033e-09	285.367	5.46946	226.51	3.678e-38
	mmu-miR-299*	12	110948853	+	GGTTTACCGTCCCACATA	TGGTTTACCGTCCCACATACAT	mmu-miR-299*	1911.25	35.3576	223.15	3.678e-38	924.6	17.1541	209.188	3.678e-38	1896.6	33.4517	120.59	3.678e-38
	mmu-miR-29a	6	31012695	-	TAGCACCATCTGAAATCG	TAGCACCATCTGAAATCGGTTA	mmu-miR-29a	15450.1	213.145	417.649	3.678e-38	15246.3	196.561	729.733	3.678e-38	17047.4	208.756	1131.37	3.678e-38
	mmu-miR-29a*	6	31012733	-	TGATTTCTTTTGGTGTTCAG	ACTGATTTCTTTTGGTGTTCAG	mmu-miR-29a*	5824.65	90.121	879.928	3.678e-38	3540.4	57.3239	1482.93	3.678e-38	6095.23	87.3263	1036.02	3.678e-38
	mmu-miR-29b	6,1	3.1013e+16	-,+	TAGCACCATTTGAAATCAG	TAGCACCATTTGAAATCAGTGTT	mmu-miR-29b	16440.7	213.101	2022.6	3.678e-38	11331.1	181.344	4349.75	3.678e-38	14329.5	198.001	2532.33	3.678e-38
	mmu-miR-29b*	6	31013089	-	GCTGGTTTCATATGGTGG	GCTGGTTTCATATGGTGGTTTA	mmu-miR-29b*	283.675	7.31517	206.815	3.678e-38	1491.4	24.4761	177.526	3.678e-38	254.2	5.08888	166.641	3.678e-38
	mmu-miR-29c	1	196863793	+	TAGCACCATTTGAAATCG	TAGCACCATTTGAAATCGGTTA	mmu-miR-29c	15880.9	221.478	4239.68	3.678e-38	7132.7	105.167	3442.8	3.678e-38	15425.7	194.582	5912.02	3.678e-38
	mmu-miR-29c*	1	196863755	+	ACCGATTTCTCCTGGTG	TGACCGATTTCTCCTGGTGTTC	mmu-miR-29c*	1381	25.5983	278.133	3.678e-38	296.833	3.42711	110.548	3.19308e-22	1225.73	21.1395	273.7	3.678e-38
	mmu-miR-300	12	110962572	+	TATGCAAGGGCAAGCTCT	TATGCAAGGGCAAGCTCTCTTC	mmu-miR-300	95.325	2.05083	9.21823	0.0737759	108.933	1.38573	10.6402	0.176054	95.5333	1.89564	21.151	0.0415017
	mmu-miR-300*	12	110962527	+	TTGAAGAGAGGTTATC	TTGAAGAGAGGTTATCCTTTGT	mmu-miR-300*	93.65	2.04196	3.1607	0.0849821	99.6	1.22181	7.53591	0.29572	93.9333	1.59779	6.51869	0.0664242
	mmu-miR-301a	11	86926555	+	CAGTGCAATAGTATTGTCAAAG	CAGTGCAATAGTATTGTCAAAGC	mmu-miR-301a	1049.97	20.1421	295.303	3.678e-38	167	2.74517	78.7813	2.19052e-06	986.867	19.5408	785.983	3.678e-38
	mmu-miR-301b	16	17124536	-	AGTGCAATGGTATTGTC	CAGTGCAATGGTATTGTCAAAGC	mmu-miR-301b	64.5	1.53967	0.702377	0.813213	64.1333	0.986842	0.757188	0.842665	63.6333	1.31059	0.351189	0.870152
	mmu-miR-302a	3	127248456	+	GCTTCCATGTTTTGGTGA	TAAGTGCTTCCATGTTTTGGTGA	mmu-miR-302a	123.025	2.54277	7.74613	7.89971e-05	163.967	1.69621	44.186	0.000940429	147.567	2.80383	43.2302	7.40049e-10
	mmu-miR-302a*	3	127248418	+	ACTTAAACGTGGTTGTACTTGC	ACTTAAACGTGGTTGTACTTGC	mmu-miR-302a*	88.525	1.90639	5.64173	0.169688	86.3333	1.15978	0.680686	0.49442	85.2333	1.55299	4.51701	0.22393
	mmu-miR-302b	3	127248192	+	AAGTGCTTCCATGTTTTAGTA	TAAGTGCTTCCATGTTTTAGTAG	mmu-miR-302b	2054.7	41.718	1332.99	3.678e-38	804.267	12.7951	390.001	3.678e-38	761.667	15.4286	368.598	3.678e-38
	mmu-miR-302b*	3	127248155	+	CTTTAACATGGGAATGCTT	ACTTTAACATGGGAATGCTTTCT	mmu-miR-302b*	66.975	1.60941	1.06888	0.758806	69.2	1.04912	2.60576	0.790782	66.5667	1.41375	0.981495	0.806494
	mmu-miR-302c	3	127248323	+	AAGTGCTTCCATGTTTCAG	AAGTGCTTCCATGTTTCAGTGG	mmu-miR-302c	140.2	3.01954	14.2882	4.47527e-07	298.267	2.62567	90.5205	2.86846e-19	139.8	2.49575	10.8056	8.7432e-09
	mmu-miR-302c*	3	127248285	+	TAACATGGGGTTACCTGC	GCTTTAACATGGGGTTACCTGC	mmu-miR-302c*	74.75	1.70063	0.768115	0.534763	197.833	2.54476	100.624	2.46119e-07	74.5	1.43986	0.984886	0.56529
	mmu-miR-302d	3	127248582	+	GTGCTTCCATGTTTGAGTG	TAAGTGCTTCCATGTTTGAGTGT	mmu-miR-302d	230.525	4.66716	75.2486	7.05962e-31	103.633	1.13529	14.4597	0.260308	214.033	3.92661	88.8793	1.70029e-31
	mmu-miR-30a	1	23279112	+	GTAAACATCCTCGACTGGA	TGTAAACATCCTCGACTGGAAG	mmu-miR-30a	15085.6	206.57	2567.08	3.678e-38	9203.67	118.851	1006.34	3.678e-38	15506.2	190.83	3462.64	3.678e-38
	mmu-miR-30a*	1	23279153	+	CTTTCAGTCGGATGTTTG	CTTTCAGTCGGATGTTTGCAGC	mmu-miR-30a*	7676.57	101.714	334.749	3.678e-38	7729	105.311	629.468	3.678e-38	7535.43	93.2698	334.388	3.678e-38
	mmu-miR-30b	15	68169053	-	TGTAAACATCCTACACTCAGC	TGTAAACATCCTACACTCAGCT	mmu-miR-30b	22154.3	270.226	838.797	3.678e-38	20439.3	239.096	1054.08	3.678e-38	22180.8	265.381	766.086	3.678e-38
	mmu-miR-30b*	15	68169015	-	GGGATGTGGATGTTTACG	CTGGGATGTGGATGTTTACGTC	mmu-miR-30b*	513.475	10.0489	152.612	3.678e-38	1079.3	15.5758	300.768	3.678e-38	589	9.6872	158.334	3.678e-38
	mmu-miR-30c	1,4	2.32986e+16	+,-	TGTAAACATCCTACACTCTCA	TGTAAACATCCTACACTCTCAGC	mmu-miR-30c	21956	266.885	318.639	3.678e-38	20792.7	253.028	432.378	3.678e-38	21226.7	254.112	508.433	3.678e-38
	mmu-miR-30c-1*	4	120442173	-	TGGGAGAGGGTTGTTTACTCC	CTGGGAGAGGGTTGTTTACTCC	mmu-miR-30c-1*	2130.55	47.8279	314.432	3.678e-38	2022.73	45.0183	516.036	3.678e-38	1812.2	40.5061	460.644	3.678e-38
	mmu-miR-30c-2*	1	23298592	+	AGAAGGCTGTTTACTC	CTGGGAGAAGGCTGTTTACTCT	mmu-miR-30c-2*	1056.72	18.7092	404.455	3.678e-38	2497.47	34.8307	2489.94	3.678e-38	1299.17	19.5183	410.584	3.678e-38
	mmu-miR-30d	15	68172841	-	TGTAAACATCCCCGACTG	TGTAAACATCCCCGACTGGAAG	mmu-miR-30d	23846.1	279.447	765.413	3.678e-38	21101.5	248.404	2444.5	3.678e-38	24073.7	259.518	287.289	3.678e-38
	mmu-miR-30e	4	120445287	-	GTAAACATCCTTGACTGGA	TGTAAACATCCTTGACTGGAAG	mmu-miR-30e	11847.8	170.391	3211.84	3.678e-38	5131.63	67.0039	1009.7	3.678e-38	11226.7	147.519	5408.45	3.678e-38
	mmu-miR-30e*	4	120445245	-	CTTTCAGTCGGATGTTTACA	CTTTCAGTCGGATGTTTACAGC	mmu-miR-30e*	18519.5	243.217	259.808	3.678e-38	15818.9	216.812	823.02	3.678e-38	15834.3	196.002	942.229	3.678e-38
	mmu-miR-31	4	88556540	-	GGCAAGATGCTGGCATAG	AGGCAAGATGCTGGCATAGCTG	mmu-miR-31	4288	68.5097	206.436	3.678e-38	5189.6	68.9355	233.481	3.678e-38	4652.67	74.8072	435.723	3.678e-38
	mmu-miR-31*	4	88556504	-	TATGCCAACATATTGCCA	TGCTATGCCAACATATTGCCATC	mmu-miR-31*	1529.78	27.106	165.316	3.678e-38	332.933	5.0777	119.212	7.90179e-32	2050.13	33.2338	457.541	3.678e-38
	mmu-miR-32	4	56908166	-	TATTGCACATTACTAAGTTGC	TATTGCACATTACTAAGTTGCA	mmu-miR-32	236.75	4.58878	72.4346	2.37264e-36	156.833	1.61448	19.1291	0.00115122	227.2	4.16976	111.539	1.09143e-36
	mmu-miR-320	14	70843363	+	AAAAGCTGGGTTGAGAGG	AAAAGCTGGGTTGAGAGGGCGA	mmu-miR-320	10405.6	145.241	1093.41	3.678e-38	15807.9	210.787	2454.79	3.678e-38	9673.37	138.265	1167.47	3.678e-38
	mmu-miR-322	X	50407505	-	CAGCAGCAATTCATGTTT	CAGCAGCAATTCATGTTTTGGA	mmu-miR-322	8935.3	120.291	482.127	3.678e-38	4144.27	71.8224	2346.04	3.678e-38	8569.73	120.417	1170.47	3.678e-38
	mmu-miR-322*	X	50407467	-	AACATGAAGCGCTGCAA	AAACATGAAGCGCTGCAACAC	mmu-miR-322*	4962.9	77.1033	350.055	3.678e-38	2615.9	38.1652	388.648	3.678e-38	4955.63	71.4491	576.5	3.678e-38
	mmu-miR-323-3p	12	110950767	+	ACATTACACGGTCGACCT	CACATTACACGGTCGACCTCT	mmu-miR-323-3p	183.725	3.57757	12.0956	1.08796e-17	454.2	6.75732	323.756	3.678e-38	179.1	3.34078	48.0528	1.02871e-18
	mmu-miR-323-5p	12	110950732	+	AGGTGGTCCGTGGCGC	AGGTGGTCCGTGGCGCGTTCGC	mmu-miR-323-5p	119.425	2.42939	17.3029	0.000455304	249.9	5.95495	157.222	9.14955e-21	118.833	2.02888	26.6796	0.000151226
	mmu-miR-324-3p	11	69825596	+	ACTGCCCCAGGTGCTGCT	CCACTGCCCCAGGTGCTGCT	mmu-miR-324-3p	6678.73	101.847	412.079	3.678e-38	6770.13	84.7305	875.395	3.678e-38	6131.43	90.9659	1276.57	3.678e-38
	mmu-miR-324-5p	11	69825561	+	ATCCCCTAGGGCATTGGT	CGCATCCCCTAGGGCATTGGTGT	mmu-miR-324-5p	3032.88	50.3591	110.939	3.678e-38	1871.37	30.4477	670.628	3.678e-38	2990.4	43.6384	407.791	3.678e-38
	mmu-miR-325	X	102574466	-	TTTATTGAGCACCTCCTATCA	TTTATTGAGCACCTCCTATCAA	mmu-miR-325	422.85	9.36765	443.182	3.678e-38	300.7	6.09071	176.752	3.46371e-32	242.467	5.45187	115.676	3.678e-38
	mmu-miR-325*	X	102574504	-	CCTAGTAGGTGCTCAGTAAGTG	CCTAGTAGGTGCTCAGTAAGTGT	mmu-miR-325*	161.15	4.18166	173.859	1.56387e-16	69	1.04662	2.87924	0.793832	98.9667	1.84178	57.1056	0.0500616
	mmu-miR-326	7	106700837	+	CTCTGGGCCCTTCCTCCA	CCTCTGGGCCCTTCCTCCAGT	mmu-miR-326	4171.82	67.075	364.562	3.678e-38	3037.47	46.1237	2611.75	3.678e-38	4481.73	72.4149	738.199	3.678e-38
	mmu-miR-327	14	45567177	-	TGAGGGGCATGAGGAT	ACTTGAGGGGCATGAGGAT	mmu-miR-327	144	2.97424	19.6806	3.85042e-08	277	2.69422	113.156	2.50761e-14	135.933	2.51583	17.9071	5.04524e-08
	mmu-miR-328	8	107832301	-	CTGGCCCTCTCTGCCCTT	CTGGCCCTCTCTGCCCTTCCGT	mmu-miR-328	10128.6	135.226	832.893	3.678e-38	13680.3	179.055	4002.67	3.678e-38	9077.97	123.621	743.381	3.678e-38
	mmu-miR-329	12	110951750	+	ACACACCCAGCTAACCTT	AACACACCCAGCTAACCTTTTT	mmu-miR-329	1395.22	32.0422	810.927	3.678e-38	523.4	9.73405	427.436	3.678e-38	1299.97	22.4091	543.653	3.678e-38
	mmu-miR-33	15	82028556	+	GTGCATTGTAGTTGCATTG	GTGCATTGTAGTTGCATTGCA	mmu-miR-33	174.6	4.00881	84.9532	1.32689e-15	156.9	2.76982	76.9059	2.10634e-05	143.633	2.2792	79.1571	1.10276e-10
	mmu-miR-33*	15	82028596	+	AATGTTTCCACAGTGCATC	CAATGTTTCCACAGTGCATCAC	mmu-miR-33*	992.95	23.1066	368.25	3.678e-38	523.8	17.7349	780.636	3.678e-38	1159.5	23.0863	402.238	3.678e-38
	mmu-miR-330	7	19766834	+	GGGCCTGTGTCTTAGGC	TCTCTGGGCCTGTGTCTTAGGC	mmu-miR-330	1887.33	41.8097	913.181	3.678e-38	846.767	20.83	762.051	3.678e-38	1683.43	30.7328	129.792	3.678e-38
	mmu-miR-330*	7	19766873	+	AAAGCACAGGGCCTGCA	GCAAAGCACAGGGCCTGCAGAGA	mmu-miR-330*	549.525	13.0885	177.402	3.678e-38	1051.03	19.0703	839.725	3.678e-38	686.033	11.6557	91.421	3.678e-38
	mmu-miR-331-3p	10	93426549	-	CCCTGGGCCTATCCTAGA	GCCCCTGGGCCTATCCTAGAA	mmu-miR-331-3p	4206.77	66.7941	225.792	3.678e-38	4721.53	61.2322	2614.73	3.678e-38	4151.97	64.6503	704.117	3.678e-38
	mmu-miR-331-5p	10	93426584	-	TAGGTATGGTCCCAGGG	CTAGGTATGGTCCCAGGGATCC	mmu-miR-331-5p	400.025	10.6426	380.654	3.678e-38	125.9	2.37773	99.0784	0.00188688	488.133	8.2859	381.759	3.678e-38
	mmu-miR-335-3p	6	30691353	+	TTTTTCATTATTGCTCCTGAC	TTTTTCATTATTGCTCCTGACC	mmu-miR-335-3p	4680.6	72.7472	624.771	3.678e-38	3579.97	63.5699	2681.12	3.678e-38	4576.03	72.6716	888.548	3.678e-38
	mmu-miR-335-5p	6	30691313	+	TCAAGAGCAATAACGAAAA	TCAAGAGCAATAACGAAAAATGT	mmu-miR-335-5p	3646.43	68.7046	1173.95	3.678e-38	1196.4	20.6665	406.376	3.678e-38	2824.23	52.1198	1739.87	3.678e-38
	mmu-miR-337-3p	12	110824058	+	CAGCTCCTATATGATGCCT	TTCAGCTCCTATATGATGCCT	mmu-miR-337-3p	348.375	7.02391	55.8595	3.678e-38	402.033	5.1698	532.466	2.41227e-26	348.2	7.44803	209.475	3.678e-38
	mmu-miR-337-5p	12	110824024	+	GGCGTCATGCAGGAGT	GAACGGCGTCATGCAGGAGTT	mmu-miR-337-5p	1075.65	18.142	246.21	3.678e-38	1338.83	17.8924	265.6	3.678e-38	1106.47	15.1703	248.626	3.678e-38
	mmu-miR-338-3p	11	119876117	-	CAGCATCAGTGATTTTGTT	TCCAGCATCAGTGATTTTGTTG	mmu-miR-338-3p	6927.25	97.329	722.717	3.678e-38	3580.97	58.9584	3043.95	3.678e-38	6242.13	93.4831	976.835	3.678e-38
	mmu-miR-338-5p	11	119876152	-	ACAATATCCTGGTGCTGAGT	AACAATATCCTGGTGCTGAGTG	mmu-miR-338-5p	2846.45	48.6472	505.267	3.678e-38	3224.57	50.6693	1107.9	3.678e-38	2274.23	35.3138	861.768	3.678e-38
	mmu-miR-339-3p	5	139845650	-	CCTCGGCGACAGAGCC	TGAGCGCCTCGGCGACAGAGCCG	mmu-miR-339-3p	1191.55	24.7805	454.58	3.678e-38	1160.63	21.115	1431.28	3.678e-38	1192.37	21.746	619.656	3.678e-38
	mmu-miR-339-5p	5	139845685	-	CCCTGTCCTCCAGGAGCT	TCCCTGTCCTCCAGGAGCTCACG	mmu-miR-339-5p	2227.9	40.9638	449.443	3.678e-38	3019.73	42.6821	1364.44	3.678e-38	2607.6	43.2226	409.459	3.678e-38
	mmu-miR-340-3p	11	49883263	+	CCGTCTCAGTTACTTTATAGC	TCCGTCTCAGTTACTTTATAGC	mmu-miR-340-3p	5230.15	80.2468	335.226	3.678e-38	3511.17	62.4637	2563.94	3.678e-38	4614.03	73.3263	671.724	3.678e-38
	mmu-miR-340-5p	11	49883221	+	TTATAAAGCAATGAGACTGATT	TTATAAAGCAATGAGACTGATT	mmu-miR-340-5p	3352.68	57.5458	1149.73	3.678e-38	1114.77	20.127	507.802	3.678e-38	3655.97	58.5692	1247.56	3.678e-38
	mmu-miR-341	12	110849765	+	TCGATCGGTCGGTCGG	TCGGTCGATCGGTCGGTCGGT	mmu-miR-341	82.975	1.78968	22.7243	0.361692	238.633	3.34097	248.791	2.506e-11	69.7333	1.49858	6.18897	0.729942
	mmu-miR-341:9.1	0	0	+	GATCGGTCGGTCGGTCA	TCGATCGGTCGGTCGGTCAGT	mmu-miR-341:9.1	311.15	5.88867	107.529	3.678e-38	360.133	4.78956	64.9972	3.678e-38	219.067	3.92428	21.0367	8.87379e-37
	mmu-miR-342-3p	12	109896889	+	CTCACACAGAAATCGCAC	TCTCACACAGAAATCGCACCCGT	mmu-miR-342-3p	9809.15	132.834	358.592	3.678e-38	10131.7	129.39	517.954	3.678e-38	10002.4	131.604	568.395	3.678e-38
	mmu-miR-342-5p	12	109896847	+	GGGTGCTATCTGTGATTGA	AGGGGTGCTATCTGTGATTGAG	mmu-miR-342-5p	3562.38	57.4348	648.72	3.678e-38	5627.47	72.9509	1147.28	3.678e-38	2559.8	39.6864	697.254	3.678e-38
	mmu-miR-343	7	19972036	+	CCTTCATGTGCCCAGA	TCTCCCTTCATGTGCCCAGA	mmu-miR-343	185.1	4.64368	178.776	9.59947e-18	141.067	3.62526	106.55	0.000120648	304.1	6.06145	343.329	3.678e-38
	mmu-miR-344	7,7	6902269169084940	-,-	ATCTAGCCAAAGCCTGAC	TGATCTAGCCAAAGCCTGACTGT	mmu-miR-344	1476.1	27.8541	415.081	3.678e-38	3450.73	47.948	788.526	3.678e-38	1715.77	26.3498	286.19	3.678e-38
	mmu-miR-345-3p	12	110075236	+	CTGAACTAGGGGTCTGGAG	CCTGAACTAGGGGTCTGGAGAC	mmu-miR-345-3p	5329.5	91.0308	721.935	3.678e-38	4133.23	62.1509	232.35	3.678e-38	3479.43	57.9013	887.743	3.678e-38
	mmu-miR-345-5p	12	110075198	+	GCTGACCCCTAGTCCAG	GCTGACCCCTAGTCCAGTGCTT	mmu-miR-345-5p	1396	25.6358	429.648	3.678e-38	801.033	17.0476	545.271	3.678e-38	1354.33	21.4649	384.453	3.678e-38
	mmu-miR-346	14	35707809	+	TGTCTGCCCGAGTGCCT	TGTCTGCCCGAGTGCCTGCCTCT	mmu-miR-346	4381.25	69.9878	734.99	3.678e-38	10027.5	125.993	1668.21	3.678e-38	3979.5	62.1669	762.968	3.678e-38
	mmu-miR-34a	4	149442581	+	GGCAGTGTCTTAGCTGGT	TGGCAGTGTCTTAGCTGGTTGT	mmu-miR-34a	5025.15	83.6278	248.425	3.678e-38	5794.07	82.7388	584.226	3.678e-38	4671.8	78.457	927.86	3.678e-38
	mmu-miR-34b-3p	9	50911701	-	CACTAACTCCACTGCCATC	AATCACTAACTCCACTGCCATC	mmu-miR-34b-3p	2478.4	42.8076	365.699	3.678e-38	2352.93	39.0298	1315.63	3.678e-38	3158.03	48.4762	214.258	3.678e-38
	mmu-miR-34b-5p	9	50911738	-	AGGCAGTGTAATTAGCTGAT	AGGCAGTGTAATTAGCTGATTGT	mmu-miR-34b-5p	378.675	8.88246	257.397	3.678e-38	123.267	1.28389	16.8589	0.0623382	231	3.62435	135.405	3.678e-38
	mmu-miR-34c	9	50911204	-	AGGCAGTGTAGTTAGCTGAT	AGGCAGTGTAGTTAGCTGATTGC	mmu-miR-34c	437.75	9.86745	300.891	3.678e-38	175.133	3.20172	99.7832	1.00486e-07	261.733	4.06113	103.692	3.678e-38
	mmu-miR-34c*	9	50911171	-	ACTAACCACACAGCCAGG	AATCACTAACCACACAGCCAGG	mmu-miR-34c*	966.175	19.6799	390.431	3.678e-38	908.1	20.7528	705.113	3.678e-38	1670.9	25.7324	569.924	3.678e-38
	mmu-miR-350	1	178702495	-	TCACAAAGCCCATACACT	TTCACAAAGCCCATACACTTTC	mmu-miR-350	6428.35	98.8891	1352.26	3.678e-38	5125.6	75.2022	766.47	3.678e-38	7335.17	106.685	437.492	3.678e-38
	mmu-miR-351	X	50406516	-	CCTGAGGAGCCCTTTGA	TCCCTGAGGAGCCCTTTGAGCCTG	mmu-miR-351	6712.75	102.507	483.46	3.678e-38	6329.6	90.3011	613.067	3.678e-38	6548.07	92.6875	717.875	3.678e-38
	mmu-miR-361	X	110188498	-	TATCAGAATCTCCAGGGG	TTATCAGAATCTCCAGGGGTAC	mmu-miR-361	8845.38	118.055	148.026	3.678e-38	9405.13	126.064	582.452	3.678e-38	8752.93	122.767	328.916	3.678e-38
	mmu-miR-362-3p	X	6819132	-	CACACCTGTTCAAGGATTC	AACACACCTGTTCAAGGATTCA	mmu-miR-362-3p	1264.67	25.0629	136.786	3.678e-38	238.167	3.55131	74.4334	5.6477e-15	1706.4	32.0402	1117.4	3.678e-38
	mmu-miR-362-5p	X	6819169	-	ATCCTTGGAACCTAGGTG	AATCCTTGGAACCTAGGTGTGAAT	mmu-miR-362-5p	511.2	11.0217	124.091	3.678e-38	188.3	3.32705	73.3684	6.94765e-08	418.767	7.55996	120.853	3.678e-38
	mmu-miR-363	X	50094896	-	ATTGCACGGTATCCATCT	AATTGCACGGTATCCATCTGTA	mmu-miR-363	77.775	1.67449	1.19269	0.441574	80.3333	1.08826	4.27707	0.623299	124.933	2.61719	66.2532	7.51494e-06
	mmu-miR-365	16,11	1345398779539960	+,+	TAATGCCCCTAAAAATCC	TAATGCCCCTAAAAATCCTTAT	mmu-miR-365	5105.05	84.6826	373.748	3.678e-38	3617.9	54.2331	453.159	3.678e-38	5476.7	88.8988	341.287	3.678e-38
	mmu-miR-367	3	127248696	+	ATTGCACTTTAGCAATGG	AATTGCACTTTAGCAATGGTGA	mmu-miR-367	99.1	2.12663	7.10164	0.0385208	84.3333	1.13529	5.08363	0.543733	96.5333	1.78227	9.33613	0.0408973
	mmu-miR-369-3p	12	110981675	+	AATAATACATGGTTGATCTT	AATAATACATGGTTGATCTTT	mmu-miR-369-3p	362.7	7.81119	184.564	3.678e-38	245.4	2.38349	39.9	2.6836e-12	357.9	6.1859	107.426	3.678e-38
	mmu-miR-369-5p	12	110981640	+	AGATCGACCGTGTTATATTC	AGATCGACCGTGTTATATTCGC	mmu-miR-369-5p	203	4.68477	162.635	4.63814e-24	95.8667	1.2467	4.77214	0.337581	223.167	3.32037	49.756	3.678e-38
	mmu-miR-370	12	110856514	+	CCTGCTGGGGTGGAACCT	GCCTGCTGGGGTGGAACCTGGT	mmu-miR-370	66.175	1.54729	10.8149	0.771637	81.5	1.11379	39.8403	0.628874	68.4	1.24039	15.0718	0.73817
	mmu-miR-374	X	100768473	-	ATATAATACAACCTGCTAAGTG	ATATAATACAACCTGCTAAGTG	mmu-miR-374	8721.77	118.16	613.336	3.678e-38	7826.33	103.257	2154.83	3.678e-38	8477.2	115.38	364.77	3.678e-38
	mmu-miR-374*	X	100768436	-	GGTTGTATTATCATTGTCCG	GGTTGTATTATCATTGTCCGAG	mmu-miR-374*	169.825	5.05121	216.855	2.31461e-13	70.7667	1.03848	2.71539	0.763596	62.1667	1.36578	0.85049	0.896124
	mmu-miR-375	1	74947257	-	TTTGTTCGTTCGGCTCGC	TTTGTTCGTTCGGCTCGCGTGA	mmu-miR-375	460.875	10.1055	321.568	3.678e-38	652.833	8.55448	478.914	3.678e-38	302.533	4.68526	184.369	3.678e-38
	mmu-miR-376a	12	110962033	+	ATCGTAGAGGAAAATCCAC	ATCGTAGAGGAAAATCCACGT	mmu-miR-376a	684.225	17.1442	733.418	3.678e-38	901.2	15.0418	1248.68	3.678e-38	646.867	16.0047	742.142	3.678e-38
	mmu-miR-376a*	12	110961995	+	GGTAGATTCTCCTTCTATGAG	GGTAGATTCTCCTTCTATGAGT	mmu-miR-376a*	410.9	9.57714	264.549	3.678e-38	95.2333	1.23616	9.91581	0.379642	120.367	2.04556	43.8158	2.01046e-05
	mmu-miR-376b	12	110961717	+	ATCATAGAGGAACATCCACTT	ATCATAGAGGAACATCCACTT	mmu-miR-376b	786.35	15.3218	488.853	3.678e-38	432.4	5.33407	122.04	3.678e-38	768.433	11.1204	401.74	3.678e-38
	mmu-miR-376b*	12	110961680	+	GTGGATATTCCTTCTATGGTT	GTGGATATTCCTTCTATGGTTA	mmu-miR-376b*	3832.78	59.7017	595.692	3.678e-38	2211.73	43.9931	2102.31	3.678e-38	3270.37	52.0695	546.825	3.678e-38
	mmu-miR-376c	12	110960979	+	AACATAGAGGAAATTTCACG	AACATAGAGGAAATTTCACGT	mmu-miR-376c	584.8	12.4635	236.502	3.678e-38	210.8	5.80658	225.54	2.13725e-16	624.667	10.75	296.447	3.678e-38
	mmu-miR-376c*	12	110960942	+	GTGGATATTCCTTCTATGTTT	GTGGATATTCCTTCTATGTTTA	mmu-miR-376c*	122.1	2.6361	11.9741	0.000214125	200.6	2.07096	56.5913	1.75584e-06	122.267	2.22258	2.60256	2.51212e-05
	mmu-miR-377	12	110978762	+	ATCACACAAAGGCAACTTT	ATCACACAAAGGCAACTTTTGT	mmu-miR-377	100.425	2.11484	30.2426	0.0241639	74.1333	1.11144	3.91195	0.724842	175.933	3.86183	106.16	4.13062e-18
	mmu-miR-378	18	61557513	-	CTGGACTTGGAGTCAGAAG	ACTGGACTTGGAGTCAGAAGG	mmu-miR-378	23517.3	272.197	277.464	3.678e-38	23796	280.529	292.759	3.678e-38	23254.5	276.332	275.05	3.678e-38
	mmu-miR-378*	18	61557551	-	CCTGACTCCAGGTCCTGT	CTCCTGACTCCAGGTCCTGTGT	mmu-miR-378*	15064.9	198.035	1126.47	3.678e-38	15487.6	201.228	1824.18	3.678e-38	15257	182.226	1974.69	3.678e-38
	mmu-miR-379	12	110947274	+	TGGTAGACTATGGAACGTA	TGGTAGACTATGGAACGTAGG	mmu-miR-379	5782.35	82.2683	149.994	3.678e-38	5986.97	81.2762	750.472	3.678e-38	5824.7	90.9253	596.901	3.678e-38
	mmu-miR-380-3p	12	110950051	+	TATGTAGTATGGTCCACATCTT	TATGTAGTATGGTCCACATCTT	mmu-miR-380-3p	86.85	1.95538	17.9181	0.205845	1509.3	27.2542	1381.86	3.678e-38	228.833	6.65941	281.083	3.678e-38
	mmu-miR-380-5p	12	110950015	+	TGGTTGACCATAGAACATG	ATGGTTGACCATAGAACATGCG	mmu-miR-380-5p	62.55	1.49935	0.635085	0.851109	65.6667	1.00716	1.44338	0.831181	86	2.04172	44.2126	0.187547
	mmu-miR-381	12	110965079	+	TATACAAGGGCAAGCTCTC	TATACAAGGGCAAGCTCTCTGT	mmu-miR-381	254.2	6.0155	159.043	5.70601e-38	87.6	1.34359	25.8529	0.372581	170	3.16703	8.83346	1.21034e-16
	mmu-miR-382	12	110971990	+	AAGTTGTTCGTGGTGGAT	GAAGTTGTTCGTGGTGGATTCG	mmu-miR-382	1106.83	22.1981	352.775	3.678e-38	2598.53	38.8459	1890.01	3.678e-38	953.567	14.767	464.621	3.678e-38
	mmu-miR-382*	12	110972028	+	CATTCACGGACAACACTTT	TCATTCACGGACAACACTTTTT	mmu-miR-382*	693.275	15.4022	539.513	3.678e-38	229.567	2.56599	80.4809	2.50287e-11	464.3	7.70349	92.9287	3.678e-38
	mmu-miR-383	8	39315254	-	GATCAGAAGGTGACTGTGG	AGATCAGAAGGTGACTGTGGCT	mmu-miR-383	71.85	1.67244	9.05189	0.614403	66.1667	1.05166	0.907377	0.820318	73.0667	1.41005	8.00021	0.604052
	mmu-miR-384-3p	X	102539653	-	ATTCCTAGAAATTGTTCACA	ATTCCTAGAAATTGTTCACAAT	mmu-miR-384-3p	382.425	7.84013	220.334	3.678e-38	92.4	1.15978	7.6896	0.40843	340.433	6.32342	189.915	3.678e-38
	mmu-miR-384-5p	X	102539694	-	TAAACAATTCCTAGGCAATGT	TGTAAACAATTCCTAGGCAATGT	mmu-miR-384-5p	217.525	4.45841	110.342	3.99356e-30	182.767	1.54919	64.3328	9.32847e-05	261.233	5.44803	159.335	3.678e-38
	mmu-miR-409-3p	12	110981413	+	AATGTTGCTCGGTGAAC	GAATGTTGCTCGGTGAACCCCT	mmu-miR-409-3p	1221.8	23.9359	456.968	3.678e-38	598.867	14.7434	918.99	3.678e-38	503.067	10.5188	685.67	3.678e-38
	mmu-miR-409-5p	12	110981381	+	GTTACCCGAGCAACTTTG	AGGTTACCCGAGCAACTTTGCAT	mmu-miR-409-5p	1044.28	23.1691	1004.49	3.678e-38	952.733	23.6124	1077.72	3.678e-38	473.867	9.06873	450.943	3.678e-38
	mmu-miR-410	12	110981973	+	AATATAACACAGATGGCCTG	AATATAACACAGATGGCCTGT	mmu-miR-410	313.475	7.39071	254.254	3.678e-38	411.7	8.65822	304.055	3.678e-38	190	3.16703	61.5564	4.35379e-25
	mmu-miR-411	12	110948399	+	TAGTAGACCGTATAGCGTACG	TAGTAGACCGTATAGCGTACG	mmu-miR-411	2491.15	45.9576	1117.89	3.678e-38	588.133	15.2035	578.356	3.678e-38	2222.77	38.9096	751.096	3.678e-38
	mmu-miR-411*	12	110948434	+	GTAACACGGTCCACTAACC	TATGTAACACGGTCCACTAACC	mmu-miR-411*	93.875	2.05083	50.83	0.080893	64.1	1.03089	1.91572	0.846894	77.4	1.63299	13.3282	0.442151
	mmu-miR-411*:9.1	0	0	+	ACACGGTCCACTAACCC	AACACGGTCCACTAACCCTCAGT	mmu-miR-411*:9.1	273	6.27179	30.2383	3.678e-38	731.067	12.3839	268.164	3.678e-38	308.333	6.00882	9.14403	3.678e-38
	mmu-miR-412	12	110981549	+	TTCACCTGGTCCACTAG	TTCACCTGGTCCACTAGCCG	mmu-miR-412	81.825	1.75483	4.92434	0.330444	81.0667	1.18487	2.99054	0.582283	81.2	1.46551	2.95973	0.342458
	mmu-miR-412:9.1	0	0	+	ACTTCACCTGGTCCACTAG	ACTTCACCTGGTCCACTAGCCGT	mmu-miR-412:9.1	67.125	1.64764	1.46828	0.754953	71.3	1.06948	1.75784	0.758666	67.7	1.40121	1.21244	0.778826
	mmu-miR-421	X	100768292	-	ACAGACATTAATTGGGCG	ATCAACAGACATTAATTGGGCGC	mmu-miR-421	1891.75	33.3289	967.275	3.678e-38	1146.37	25.5768	1069.85	3.678e-38	1533.73	21.7991	850.239	3.678e-38
	mmu-miR-423-3p	11	76891611	-	AGCTCGGTCTGAGGCCCC	AGCTCGGTCTGAGGCCCCTCAGT	mmu-miR-423-3p	3667.85	58.7794	223.719	3.678e-38	3454.27	48.4686	443.372	3.678e-38	3599.57	56.8213	344.343	3.678e-38
	mmu-miR-423-5p	11	76891647	-	GGCAGAGAGCGAGACTT	TGAGGGGCAGAGAGCGAGACTTT	mmu-miR-423-5p	978.525	19.7102	313.581	3.678e-38	1443.33	23.0414	772.414	3.678e-38	937.333	17.3819	398.174	3.678e-38
	mmu-miR-425	9	108471119	+	CGATCACTCCCGTTGA	AATGACACGATCACTCCCGTTGA	mmu-miR-425	11353	145.59	391.848	3.678e-38	9402.8	126.142	1175.12	3.678e-38	10399.9	137.898	642.629	3.678e-38
	mmu-miR-425*	9	108471160	+	ATCGGGAATGTCGTGTCC	ATCGGGAATGTCGTGTCCGCC	mmu-miR-425*	1455.92	26.2249	349.976	3.678e-38	1548.03	26.397	2309.6	3.678e-38	1261.07	19.6204	260.484	3.678e-38
	mmu-miR-429	4	155428047	-	ATACTGTCTGGTAATGCCG	TAATACTGTCTGGTAATGCCGT	mmu-miR-429	157.95	3.27468	47.0617	2.59822e-11	115.467	1.37864	23.8179	0.138637	183.1	4.05663	80.6013	1.55716e-20
	mmu-miR-431	12	110828668	+	TGTCTTGCAGGCCGTCAT	TGTCTTGCAGGCCGTCATGCA	mmu-miR-431	83.65	1.80359	8.36919	0.25756	74.9	1.07314	2.53574	0.707681	89.8	1.59779	16.7726	0.141402
	mmu-miR-431*	12	110828711	+	GGTCGTCTTGCAGGGC	CAGGTCGTCTTGCAGGGCTTCT	mmu-miR-431*	67.8	1.54285	0.787401	0.739146	109.267	2.11345	67.6661	0.0367494	69.9	1.38997	1.73493	0.719433
	mmu-miR-433	12	110829990	+	ATCATGATGGGCTCCTCG	ATCATGATGGGCTCCTCGGTGT	mmu-miR-433	83.2	1.73883	7.70584	0.294664	452.667	5.71307	545.808	3.678e-38	88.5667	1.5142	24.5392	0.117811
	mmu-miR-433*	12	110829938	+	ACGGTGAGCCTGTCATTA	TACGGTGAGCCTGTCATTATTC	mmu-miR-433*	113.35	2.49352	29.778	0.00144911	198.467	2.26742	148.354	3.95968e-05	99.1333	1.89737	3.02875	0.0217593
	mmu-miR-434-3p	12	110832774	+	TTGAACCATCACTCGACT	TTTGAACCATCACTCGACTCCT	mmu-miR-434-3p	1702.75	32.4027	289.114	3.678e-38	1429.33	23.5634	561.66	3.678e-38	1687.1	26.4491	447.958	3.678e-38
	mmu-miR-434-5p	12	110832737	+	CTCGACTCATGGTTTGAA	GCTCGACTCATGGTTTGAACCA	mmu-miR-434-5p	1718.55	32.4134	310.798	3.678e-38	1884.97	30.4157	348.44	3.678e-38	1500.67	24.5176	139.531	3.678e-38
	mmu-miR-448	X	143592823	+	TGCATATGTAGGATGTCCC	TTGCATATGTAGGATGTCCCAT	mmu-miR-448	276.125	8.33526	388.917	3.678e-38	87.6333	1.13529	4.36616	0.492249	81.1	1.57015	2.08087	0.340826
	mmu-miR-449a	13	113827756	+	GGCAGTGTATTGTTAGCTG	TGGCAGTGTATTGTTAGCTGGT	mmu-miR-449a	215.725	4.48549	62.8211	5.37738e-30	361.633	7.15843	478.378	1.85497e-30	221.9	3.86893	55.4501	3.678e-38
	mmu-miR-449b	13	113827636	+	GCAGTGTTGTTAGCTGGC	AGGCAGTGTTGTTAGCTGGC	mmu-miR-449b	78.25	1.80929	3.93827	0.431533	546.6	11.4005	786.41	3.678e-38	316.9	7.95502	409.63	3.678e-38
	mmu-miR-449c	13	113826215	+	AGGCAGTGCATTGCTAG	AGGCAGTGCATTGCTAGCTGG	mmu-miR-449c	69.975	1.6033	2.08866	0.685884	68.9	1.05533	1.7088	0.791681	68.2667	1.40121	2.35443	0.765359
	mmu-miR-450a-3p	X	50401503	-	GGATGCTTTGCATTCAT	ATTGGGGATGCTTTGCATTCAT	mmu-miR-450a-3p	76.35	1.79269	5.42433	0.47859	219.6	2.17322	242.242	1.15584e-05	180.433	3.70373	154.048	1.05503e-16
	mmu-miR-450a-5p	X,X	5040140550401530	-,-	TTTTGCGATGTGTTCCTA	TTTTGCGATGTGTTCCTAATAT	mmu-miR-450a-5p	8385.42	119.696	629.901	3.678e-38	2537.63	52.5256	2338.07	3.678e-38	7339.37	111.689	1329.25	3.678e-38
	mmu-miR-450b-3p	X	50401207	-	ATTGGGAACATTTTGCAT	ATTGGGAACATTTTGCATGCAT	mmu-miR-450b-3p	1776.85	31.9627	396.841	3.678e-38	937.167	14.8136	468.981	3.678e-38	1817.53	29.65	495.483	3.678e-38
	mmu-miR-450b-5p	X	50401243	-	TTTTGCAGTATGTTCCTGA	TTTTGCAGTATGTTCCTGAATA	mmu-miR-450b-5p	418.05	10.914	336.11	3.678e-38	110.7	1.37864	17.9477	0.108225	221.2	4.85462	120.761	1.28467e-33
	mmu-miR-451	11	77886687	+	AACCGTTACCATTACTGAGT	AAACCGTTACCATTACTGAGTT	mmu-miR-451	28981.8	321.409	485.6	3.678e-38	17644.2	250.074	4274.48	3.678e-38	28350	274.863	1590.84	3.678e-38
	mmu-miR-452	X	69507632	-	GTTTGCAGAGGAAACTGA	TGTTTGCAGAGGAAACTGAGAC	mmu-miR-452	225.325	4.59785	58.8878	1.28858e-35	105.033	1.5863	37.5001	0.101173	182.333	3.44423	58.9665	1.32179e-19
	mmu-miR-453	12	110973878	+	GCCTCATAGTGAGCTTGC	AGGTTGCCTCATAGTGAGCTTGCA	mmu-miR-453	199.125	3.92503	27.4355	2.39324e-21	429.6	5.20507	119.91	3.678e-38	450.9	8.53267	214.562	3.678e-38
	mmu-miR-455	4	62917937	+	CAGTCCACGGGCATATA	GCAGTCCACGGGCATATACAC	mmu-miR-455	8272.3	117.166	169.069	3.678e-38	10288.7	130.056	1469.79	3.678e-38	9769.6	126.876	397.754	3.678e-38
	mmu-miR-455*	4	62917900	+	TATGTGCCTTTGGACTACA	TATGTGCCTTTGGACTACATCG	mmu-miR-455*	479.475	12.7161	387.926	3.678e-38	351.733	3.78335	55.7001	8.945e-34	417.333	6.6648	218.285	3.678e-38
	mmu-miR-463	X	64052433	-	TGATAGACACCATATAAGG	TGATAGACACCATATAAGGTAG	mmu-miR-463	134.425	2.95306	9.77697	2.68834e-06	183.333	1.74783	61.1981	4.52252e-05	143.067	2.94924	42.6728	2.04102e-09
	mmu-miR-463*	X	64052470	-	TACCTAATTTGTTGTCCATCA	TACCTAATTTGTTGTCCATCAT	mmu-miR-463*	290.35	7.04989	253.861	3.678e-38	75.4	1.15413	16.8021	0.628492	68.0333	1.38997	5.69239	0.78051
	mmu-miR-464	15	74476224	+	TACCAAGTTTATTCTGTGAGATA	TACCAAGTTTATTCTGTGAGATA	mmu-miR-464	77.725	1.95212	0.4272	0.442273	85.3333	1.22394	2.71539	0.526979	79.1333	1.6169	1.12398	0.403459
	mmu-miR-465a-3p,mmu-miR-465b-3p,mmu-miR-465c-3p,mmu-miR-465a-3p,mmu-miR-465b-3p,mmu-miR-465c-3p,mmu-miR-465a-3p,mmu-miR-465b-3p,mmu-miR-465c-3p	X,X,X,X,X,X,X,X,X,X,X,X,X,X,X	6.40923e+119	-,-,-,-,-,-,-,-,-,-,-,-,-,-,-	AGGGCCTTTCTAAGTAG	GATCAGGGCCTTTCTAAGTAGA,GATCAGGGCCTTTCTAAGTAGA,GATCAGGGCCTTTCTAAGTAGA,GATCAGGGCCTTTCTAAGTAGA,GATCAGGGCCTTTCTAAGTAGA,GATCAGGGCCTTTCTAAGTAGA,GATCAGGGCCTTTCTAAGTAGA,GATCAGGGCCTTTCTAAGTAGA,GATCAGGGCCTTTCTAAGTAGA	mmu-miR-465a-3p,mmu-miR-465b-3p,mmu-miR-465c-3p,mmu-miR-465a-3p,mmu-miR-465b-3p,mmu-miR-465c-3p,mmu-miR-465a-3p,mmu-miR-465b-3p,mmu-miR-465c-3p	348.175	7.15466	72.6282	3.678e-38	536.5	7.54005	105.129	3.678e-38	375.9	6.12826	265.028	3.678e-38
	mmu-miR-465a-5p	X	64092297	-	TATTTAGAATGGCACTGATGT	TATTTAGAATGGCACTGATGTGA	mmu-miR-465a-5p	88.225	2.07601	9.08346	0.160777	109.133	1.4303	5.50757	0.13526	91.3	1.6698	3.60416	0.0937369
	mmu-miR-465b-5p	X,X	6408900864082440	-,-	AGAATGGTGCTGATCT	TATTTAGAATGGTGCTGATCTG	mmu-miR-465b-5p	71.25	1.72496	1.54164	0.641591	74.8667	1.07314	1.46401	0.704117	71.4	1.50858	1.38924	0.674183
	mmu-miR-465c-5p	X,X	6407920164085760	-,-	TAGAATGGCGCTGATC	TATTTAGAATGGCGCTGATCTG	mmu-miR-465c-5p	622.725	11.9563	42.8509	3.678e-38	1228.67	15.485	231.059	3.678e-38	777.767	11.1424	90.3165	3.678e-38
	mmu-miR-466a-3p,mmu-miR-466b-3p,mmu-miR-466c-3p,mmu-miR-466e-3p,mmu-miR-466a-3p,mmu-miR-466b-3p,mmu-miR-466c-3p,mmu-miR-466e-3p,mmu-miR-466b-3-3p,mmu-miR-466a-3p,mmu-miR-466b-3p,mmu-miR-466c-3p,mmu-miR-466e-3p,mmu-miR-466a-3p,mmu-miR-466b-3p,mmu-miR-466c-3p,mmu-miR-466e-3p	2,2,2,2,2,2,2,2,2,2,2,2,2,2,2,2,2,2,2,2,2	1.04296e+167	+,+,+,+,+,+,+,+,+,+,+,+,+,+,+,+,+,+,+,+,+	TACATACACGCACACATAAGA	TATACATACACGCACACATAAGA,TATACATACACGCACACATAAGA,TATACATACACGCACACATAAGA,TATACATACACGCACACATAAGA,TATACATACACGCACACATAAGA,TATACATACACGCACACATAAGA,TATACATACACGCACACATAAGA,TATACATACACGCACACATAAGA,AATACATACACGCACACATAAGA,TATACATACACGCACACATAAGA,TATACATACACGCACACATAAGA,TATACATACACGCACACATAAGA,TATACATACACGCACACATAAGA,TATACATACACGCACACATAAGA,TATACATACACGCACACATAAGA,TATACATACACGCACACATAAGA,TATACATACACGCAC…	mmu-miR-466a-3p,mmu-miR-466b-3p,mmu-miR-466c-3p,mmu-miR-466e-3p,mmu-miR-466a-3p,mmu-miR-466b-3p,mmu-miR-466c-3p,mmu-miR-466e-3p,mmu-miR-466b-3-3p,mmu-miR-466a-3p,mmu-miR-466b-3p,mmu-miR-466c-3p,mmu-miR-466e-3p,mmu-miR-466a-3p,mmu-miR-466b-3p,mmu-miR-466c-3p,mmu-miR-466e-3p	4113.6	68.5508	493.2	3.678e-38	6029.97	79.6648	1396.48	3.678e-38	3613.6	56.3331	1100.16	3.678e-38
	mmu-miR-466a-5p	2	10429554	+	TATGTGTGTGTACATGTACATA	TATGTGTGTGTACATGTACATA	mmu-miR-466a-5p	698.475	12.5368	273.623	3.678e-38	919.033	15.1698	440.185	3.678e-38	724.5	13.6073	253.669	3.678e-38
	mmu-miR-466b-5p	2,2,2	1.04252e+23	+,+,+	GATGTGTGTGTACATGTACATG	GATGTGTGTGTACATGTACATG	mmu-miR-466b-5p	110.075	2.51895	58.4975	0.00475246	103.067	1.22927	23.8383	0.217812	123.767	2.04716	67.2723	3.88667e-06
	mmu-miR-466c-5p	2	10403171	+	GATGTGTGTGTGCATGTACATA	GATGTGTGTGTGCATGTACATA	mmu-miR-466c-5p	2063.2	38.0545	583.532	3.678e-38	3197.2	47.4207	2609.5	3.678e-38	1214.3	19.0898	502.373	3.678e-38
	mmu-miR-466d-3p	2	10433643	+	TATACATACACGCACACATAG	TATACATACACGCACACATAG	mmu-miR-466d-3p	2979.22	54.1043	438.189	3.678e-38	2427.43	38.2552	865.737	3.678e-38	2468.27	39.7863	626.445	3.678e-38
	mmu-miR-466d-5p	2	10433603	+	GTGTGTGCGTACATGTA	TGTGTGTGCGTACATGTACATG	mmu-miR-466d-5p	174.075	3.96096	132.977	2.82805e-19	84.2667	1.15978	2.70062	0.546384	106.7	1.85838	38.0307	0.00195168
	mmu-miR-466e-5p	2	10398267	+	GATGTGTGTGTACATGTACATA	GATGTGTGTGTACATGTACATA	mmu-miR-466e-5p	421.55	8.87655	142.752	3.678e-38	182.067	1.89737	42.6508	4.02843e-05	472.467	8.55188	209.301	3.678e-38
	mmu-miR-466f	13	71245985	+	ACGTGTGTGTGCATGTGCATGT	ACGTGTGTGTGCATGTGCATGT	mmu-miR-466f	594.5	11.2048	18.1137	3.678e-38	824.033	12.1044	271.187	3.678e-38	506.333	8.06007	63.7374	3.678e-38
	mmu-miR-466f-3p	2,2,2	1.03904e+23	+,+,+	CATACACACACACATACACAC	CATACACACACACATACACAC	mmu-miR-466f-3p	7199.45	108.038	927.097	3.678e-38	11521.9	140.701	3002.66	3.678e-38	6690.87	99.9298	116.278	3.678e-38
	mmu-miR-466f-5p	2,2,2	1.03936e+23	+,+,+	TACGTGTGTGTGCATGTGC	TACGTGTGTGTGCATGTGCATG	mmu-miR-466f-5p	310.725	6.50656	163.88	3.678e-38	446.467	3.75508	184.018	3.678e-38	255.333	3.99706	52.8929	3.678e-38
	mmu-miR-466g	2	10436268	+	ATACAGACACATGCACACAC	ATACAGACACATGCACACACA	mmu-miR-466g	1800.58	32.6758	422.964	3.678e-38	3507.1	50.9963	571.649	3.678e-38	1507.13	23.908	357.824	3.678e-38
	mmu-miR-466h	2	10436527	+	TGTGTGCATGTGCTTGTGTGT	TGTGTGCATGTGCTTGTGTGTA	mmu-miR-466h	1106.38	21.2436	269.612	3.678e-38	1484.2	22.1639	180.71	3.678e-38	705.4	11.6164	413.701	3.678e-38
	mmu-miR-466i	13	17839385	+	ATACACACACACATACACACTA	ATACACACACACATACACACTA	mmu-miR-466i	7174.12	111.978	753.063	3.678e-38	9912.93	130.324	2129.67	3.678e-38	5979.2	97.9963	568.406	3.678e-38
	mmu-miR-466j	10	60423549	+	GCATGTGCATGTGTGTAA	TGTGTGCATGTGCATGTGTGTAA	mmu-miR-466j	113.95	2.28143	10.9619	0.00184026	200.067	1.78995	85.8392	4.87053e-06	156.667	3.54135	81.3487	3.54419e-13
	mmu-miR-466k	3	85271317	+	TGTGTGTGTACATGTACATGTGA	TGTGTGTGTACATGTACATGTGA	mmu-miR-466k	257.225	5.91699	116.486	3.678e-38	421.533	8.61629	617.361	3.678e-38	129.233	2.12455	68.9816	5.09792e-07
	mmu-miR-466l	2	10437782	+	TATAAATACATGCACACATATT	TATAAATACATGCACACATATT	mmu-miR-466l	144.75	3.14034	11.9405	5.42567e-08	233.167	1.98425	62.222	6.21587e-10	210.3	3.66595	101.965	2.72008e-29
	mmu-miR-467a	2	10397981	+	GTGCCTGCATGTATATGC	TAAGTGCCTGCATGTATATGCG	mmu-miR-467a	1288.12	22.1031	348.22	3.678e-38	1237.1	19.9023	198.304	3.678e-38	1215.6	23.089	276.309	3.678e-38
	mmu-miR-467a*,mmu-miR-467d*,mmu-miR-467a*,mmu-miR-467d*	2,2,2,2	1.0398e+31	+,+,+,+	ATATACATACACACACCTACAC	ATATACATACACACACCTACAC,ATATACATACACACACCTACAC,ATATACATACACACACCTACAC,ATATACATACACACACCTACAC	mmu-miR-467a*,mmu-miR-467d*,mmu-miR-467a*,mmu-miR-467d*	2472.57	45.2407	290.237	3.678e-38	1642.57	26.8672	409.762	3.678e-38	2950.4	48.7101	465.3	3.678e-38
	mmu-miR-467b	2	10402882	+	GTAAGTGCCTGCATGTATATG	GTAAGTGCCTGCATGTATATG	mmu-miR-467b	81.2	1.74923	18.333	0.285309	74.0667	1.11613	1.0504	0.715075	75.9667	1.57015	12.2415	0.510609
	mmu-miR-467b*	2	10402919	+	ATATACATACACACACCAACAC	ATATACATACACACACCAACAC	mmu-miR-467b*	70.25	1.63479	13.8054	0.663492	69.9667	1.10613	8.03264	0.746731	77.8	1.3528	23.2172	0.407568
	mmu-miR-467c	2	10395567	+	TAAGTGCGTGCATGTATATGTG	TAAGTGCGTGCATGTATATGTG	mmu-miR-467c	780.525	17.4738	597.136	3.678e-38	671.067	15.9823	1013.19	3.678e-38	1139.63	18.5007	913.241	3.678e-38
	mmu-miR-467d	2	10429266	+	TGCGCGCATGTATATGCG	TAAGTGCGCGCATGTATATGCG	mmu-miR-467d	94.075	1.90072	17.0773	0.102729	99.2667	1.15978	8.10823	0.30111	90.3667	1.5142	6.86319	0.116548
	mmu-miR-467e	2	10427357	+	ATAAGTGTGAGCATGTATATGT	ATAAGTGTGAGCATGTATATGT	mmu-miR-467e	3125.68	58.7192	663.816	3.678e-38	1646.13	32.4612	1204.13	3.678e-38	2456.1	42.7818	370.874	3.678e-38
	mmu-miR-467e*	2	10427394	+	ATATACATACACACACCTATAT	ATATACATACACACACCTATAT	mmu-miR-467e*	178.5	4.88886	133.873	1.50724e-20	109.033	1.28389	7.45744	0.164895	166.1	3.21374	55.5222	9.99022e-17
	mmu-miR-467f	11	69448942	-	ATATACACACACACACCTAC	ATATACACACACACACCTACA	mmu-miR-467f	1866.62	36.7379	615.188	3.678e-38	3776.77	56.4411	1704.4	3.678e-38	2184.73	34.2919	451.169	3.678e-38
	mmu-miR-467g	5	35075542	-	ATACATACACACACATATAT	TATACATACACACACATATAT	mmu-miR-467g	61.1	1.48059	1.94936	0.873687	60.0333	0.944886	1.45717	0.887251	60.5667	1.34213	0.602771	0.918848
	mmu-miR-467h	9	115291015	+	ATAAGTGTGTGCATGTATATGT	ATAAGTGTGTGCATGTATATGT	mmu-miR-467h	441.575	10.0648	193.525	3.678e-38	523.9	6.0392	218.847	3.678e-38	309.1	5.7133	63.7028	3.678e-38
	mmu-miR-468	6	81846619	-	ATGACTGATGTGCGTGTG	TATGACTGATGTGCGTGTGTCTG	mmu-miR-468	81.975	1.74249	1.57348	0.31736	92.9	1.15978	8.07279	0.412523	83.2	1.45476	1.7088	0.277771
	mmu-miR-469	5	113772110	+	CCTCTTTCATTGATCTTGG	TGCCTCTTTCATTGATCTTGGTGTCC	mmu-miR-469	74.625	1.79378	0.917878	0.541721	171.6	4.3592	147.834	1.72158e-08	85.6333	1.4964	17.2053	0.185849
	mmu-miR-470	X	64067193	-	TTCTTGGACTGGCACTG	TTCTTGGACTGGCACTGGTGAGT	mmu-miR-470	100.4	2.44187	33.8784	0.0234645	112.433	1.69389	42.0602	0.0483622	88.4333	1.71193	10.6214	0.14452
	mmu-miR-470*	X	64067158	-	AACCAGTACCTTTCTGAGAAG	AACCAGTACCTTTCTGAGAAGA	mmu-miR-470*	299.975	5.69408	122.008	3.678e-38	283.667	2.64006	173.625	4.81485e-16	213.9	3.73029	27.2901	2.48902e-34
	mmu-miR-471	X	64045831	-	TACGTAGTATAGTGCTTTTCAC	TACGTAGTATAGTGCTTTTCAC	mmu-miR-471	83.45	1.99706	8.26014	0.271764	91.9	1.22927	4.47996	0.415402	81.3667	1.67332	2.32881	0.335059
	mmu-miR-471:9.1	0	0	+	TACGTAGTATAGTGCTTTTCACA	TACGTAGTATAGTGCTTTTCACA	mmu-miR-471:9.1	68.275	1.61882	2.40052	0.725604	73.6333	1.03595	0.602771	0.716529	70.4333	1.41468	6.71143	0.688458
	mmu-miR-483	7	149840895	-	AGACGGGAGAAGAGAAGG	AAGACGGGAGAAGAGAAGGGAG	mmu-miR-483	170.875	3.1816	84.8295	1.62772e-11	59.6667	0.993443	1.44338	0.887808	145.533	2.69883	35.2287	1.34971e-10
	mmu-miR-483*	7	149840858	-	TCCTCCCCTCCCGTCTT	TCACTCCTCCCCTCCCGTCTT	mmu-miR-483*	283.2	6.1668	114.169	3.678e-38	401.567	5.68613	244.507	3.678e-38	180.633	4.11628	101.269	2.40362e-21
	mmu-miR-484	16	14159722	+	TCAGGCTCAGTCCCCTCC	TCAGGCTCAGTCCCCTCCCGAT	mmu-miR-484	4311.98	77.8526	200.836	3.678e-38	5148.43	74.3412	207.13	3.678e-38	4241.97	81.5034	489.975	3.678e-38
	mmu-miR-485	12	110973119	+	AGGCTGGCCGTGATGAAT	AGAGGCTGGCCGTGATGAATTC	mmu-miR-485	268.55	5.26354	101.61	3.678e-38	711.133	14.4595	540.035	3.678e-38	250.6	4.43191	93.5615	3.678e-38
	mmu-miR-485*	12	110973155	+	GTCATACACGGCTCTCCT	AGTCATACACGGCTCTCCTCTC	mmu-miR-485*	188.075	3.80325	59.5579	1.57306e-21	89.1667	1.17934	3.06649	0.456678	153.667	2.70874	87.2293	1.84205e-10
	mmu-miR-486	8	24253058	+	TCCTGTACTGAGCTGCCC	TCCTGTACTGAGCTGCCCCGAG	mmu-miR-486	19442.8	245.137	876.974	3.678e-38	21511.4	274.876	644.125	3.678e-38	18575.7	246.618	591.589	3.678e-38
	mmu-miR-487b	12	110965591	+	TCGTACAGGGTCATCCAC	AATCGTACAGGGTCATCCACTT	mmu-miR-487b	122.875	2.53369	45.4787	6.48672e-05	169.033	2.04076	27.6952	2.43245e-05	183.167	3.13967	68.7416	4.31055e-23
	mmu-miR-488	1	160435819	+	TTGAAAGGCTGTTTCTTG	TTGAAAGGCTGTTTCTTGGTC	mmu-miR-488	71.55	1.61913	13.4081	0.589092	120.1	1.27776	101.939	0.107111	66.5	1.37056	3.66606	0.806249
	mmu-miR-488*	1	160435781	+	CCCAGATAATAGCACTCTCA	CCCAGATAATAGCACTCTCAA	mmu-miR-488*	147.6	2.80703	14.2002	8.51914e-09	147.033	1.50858	12.8539	0.00380803	122.5	2.1088	9.8	3.01326e-05
	mmu-miR-489	6	3671945	-	AATGACACCACATATATGGC	AATGACACCACATATATGGCAGC	mmu-miR-489	541.8	11.6919	30.5476	3.678e-38	788.467	10.2145	204.689	3.678e-38	629.667	10.571	76.0083	3.678e-38
	mmu-miR-490	6	36371799	+	AACCTGGAGGACTCCAT	CAACCTGGAGGACTCCATGCTG	mmu-miR-490	716.625	12.462	165.292	3.678e-38	1414.3	21.4296	330.859	3.678e-38	778.467	12.6905	496.341	3.678e-38
	mmu-miR-491	4	87767960	+	AGTGGGGAACCCTTCCAT	AGTGGGGAACCCTTCCATGAGG	mmu-miR-491	1122.17	24.0403	535.874	3.678e-38	1552.13	32.8591	1198.91	3.678e-38	1394.77	27.8146	520.158	3.678e-38
	mmu-miR-493	12	110818492	+	AGGTCCTACTGTGTGCCA	TGAAGGTCCTACTGTGTGCCAGG	mmu-miR-493	162.75	3.27198	17.8087	9.47537e-12	334.567	3.30814	97.047	1.53924e-26	179.2	2.91088	7.75822	4.03841e-20
	mmu-miR-494	12	110953576	+	AACATACACGGGAAACCT	TGAAACATACACGGGAAACCTC	mmu-miR-494	1133.3	22.3075	58.608	3.678e-38	859.6	17.1194	467.591	3.678e-38	1065.9	19.2457	156.738	3.678e-38
	mmu-miR-495	12	110957004	+	ACAAACATGGTGCACTTC	AAACAAACATGGTGCACTTCTT	mmu-miR-495	491.375	11.0059	375.769	3.678e-38	404.6	4.98704	231.881	3.678e-38	521.9	8.83258	186.606	3.678e-38
	mmu-miR-496	12	110977374	+	ATTACATGGCCAATCTC	TGAGTATTACATGGCCAATCTC	mmu-miR-496	226.9	5.46917	219.829	3.83742e-25	78.6	1.11144	6.17333	0.661679	154.5	2.93369	143.067	8.26427e-10
	mmu-miR-497	11	70048231	+	AGCAGCACACTGTGGTTT	CAGCAGCACACTGTGGTTTGTA	mmu-miR-497	3296.32	54.498	515.324	3.678e-38	3995.77	50.2695	737.614	3.678e-38	5298.23	77.0401	1489.4	3.678e-38
	mmu-miR-499	2	155448628	+	TTAAGACTTGCAGTGATGTTT	TTAAGACTTGCAGTGATGTTT	mmu-miR-499	19473.7	241.004	340.137	3.678e-38	17741.4	231.795	1669.92	3.678e-38	19219.4	252.007	829.524	3.678e-38
	mmu-miR-500	X	6814843	-	TGCACCTGGGCAAGGGT	AATGCACCTGGGCAAGGGTTCA	mmu-miR-500	1922.17	32.7711	304.159	3.678e-38	1457.9	21.4092	348.544	3.678e-38	2089.3	31.408	620.982	3.678e-38
	mmu-miR-501-3p	X	6818418	-	TGCACCCGGGCAAGGAT	AATGCACCCGGGCAAGGATTTG	mmu-miR-501-3p	622	13.3219	149.78	3.678e-38	436.9	6.52807	199.946	3.678e-38	392.067	6.82374	60.3018	3.678e-38
	mmu-miR-501-5p	X	6818455	-	ATCCTTTGTCCCTGGGT	AATCCTTTGTCCCTGGGTGAAA	mmu-miR-501-5p	281.175	5.41802	59.8017	3.678e-38	645.767	8.64016	569.092	3.678e-38	403.267	6.26506	67.1168	3.678e-38
	mmu-miR-503	X	50407227	-	AGCAGCGGGAACAGTAC	TAGCAGCGGGAACAGTACTGCAG	mmu-miR-503	2763.35	48.9783	332.607	3.678e-38	2972.73	43.6613	662.589	3.678e-38	2201.27	32.9053	308.479	3.678e-38
	mmu-miR-503*	X	50407186	-	GTATTGTTTCCACTGCCTG	GAGTATTGTTTCCACTGCCTGG	mmu-miR-503*	3546.38	60.2993	729.838	3.678e-38	919.567	22.2208	973.489	3.678e-38	3110.13	49.4881	730.167	3.678e-38
	mmu-miR-504	X	56350904	-	ACCCTGGTCTGCACTCTAT	AGACCCTGGTCTGCACTCTATC	mmu-miR-504	8782.75	128.984	716.091	3.678e-38	10319.1	135.624	4082.34	3.678e-38	9289.83	116.691	690.635	3.678e-38
	mmu-miR-505	X	57647613	-	GTCAACACTTGCTGGTTT	CGTCAACACTTGCTGGTTTTCT	mmu-miR-505	267.975	6.71719	211.008	3.678e-38	70.3333	1.06581	2.94845	0.77679	348.267	7.71426	233.079	3.678e-38
	mmu-miR-509-3p	X	65263311	-	TGATTGACATTTCTGTAATGG	TGATTGACATTTCTGTAATGG	mmu-miR-509-3p	74.2	1.73375	1.75309	0.552616	80.1333	1.13068	3.85919	0.623934	75.6667	1.38148	2.51661	0.530345
	mmu-miR-509-5p	X	65263346	-	CTCCAGAATGTGGCAATC	TACTCCAGAATGTGGCAATCAT	mmu-miR-509-5p	101.85	2.20427	4.1996	0.0226674	88.0667	1.18487	2.34592	0.475689	99.6	1.7852	6.245	0.0216181
	mmu-miR-511	2	14182639	+	GCCTTTTGCTCTGCAC	ATGCCTTTTGCTCTGCACTCA	mmu-miR-511	424.375	8.9951	126.123	3.678e-38	701.667	9.80556	201.56	3.678e-38	526.667	8.70467	127.772	3.678e-38
	mmu-miR-532-3p	X	6825567	-	CCACACCCAAGGCTTG	CCTCCCACACCCAAGGCTTGCA	mmu-miR-532-3p	3347.88	62.4854	242.672	3.678e-38	5243.53	74.0006	1335.51	3.678e-38	3434.93	59.7534	143.162	3.678e-38
	mmu-miR-532-5p	X	6825604	-	CATGCCTTGAGTGTAGGAC	CATGCCTTGAGTGTAGGACCGT	mmu-miR-532-5p	3299.2	55.002	692.924	3.678e-38	2450.57	33.9448	803.886	3.678e-38	2967.3	45.4052	963.927	3.678e-38
	mmu-miR-539	12	110966345	+	GGAGAAATTATCCTTGGTGT	GGAGAAATTATCCTTGGTGTGT	mmu-miR-539	359.025	7.29242	96.8299	3.678e-38	113.067	2.23665	58.1405	0.0311697	116.433	1.8311	26.7582	0.000125841
	mmu-miR-540-3p	12	110824331	+	GGTCAGAGGTCGATCCT	AGGTCAGAGGTCGATCCTGG	mmu-miR-540-3p	484.2	10.8284	263.469	3.678e-38	1673.67	26.6626	1348.87	3.678e-38	165.7	3.22936	43.6233	2.87947e-16
	mmu-miR-540-5p	12	110824294	+	AAGGGTCACCCTCTGACT	CAAGGGTCACCCTCTGACTCTGT	mmu-miR-540-5p	62	1.35256	8.686	0.85886	54.6	0.943502	0	0.926792	55.4667	1.26181	0.750555	0.96801
	mmu-miR-541	12	110980631	+	AGGGATTCTGATGTTGGT	AAGGGATTCTGATGTTGGTCACACT	mmu-miR-541	994	19.8907	455.122	3.678e-38	1351.13	21.0692	102.611	3.678e-38	661.533	11.2427	129.594	3.678e-38
	mmu-miR-542-3p	X	50402614	-	TGTGACAGATTGATAACTGAAA	TGTGACAGATTGATAACTGAAA	mmu-miR-542-3p	3174.1	53.1328	1038.22	3.678e-38	1830.43	27.36	662.286	3.678e-38	3375.2	57.5792	1706.48	3.678e-38
	mmu-miR-542-5p	X	50402652	-	TCGGGGATCATCATGTC	CTCGGGGATCATCATGTCACGA	mmu-miR-542-5p	106.1	2.23212	28.961	0.00371393	68.6333	1.08043	9.97113	0.758794	87.2	1.43258	18.1827	0.159335
	mmu-miR-543	12	110955513	+	AACATTCGCGGTGCACT	AAACATTCGCGGTGCACTTCTT	mmu-miR-543	129.1	2.74076	86.8041	0.000457558	63.4	0.968794	1.49332	0.856045	99.3667	1.69389	64.981	0.00983754
	mmu-miR-544	12	110967580	+	TTCTGCATTTTTAGCAAGC	ATTCTGCATTTTTAGCAAGCTC	mmu-miR-544	61	1.35401	1.78699	0.878821	64.7667	1.01363	1.06927	0.840507	217.233	5.06029	160.404	2.48858e-34
	mmu-miR-546	10	126435526	+	ATGGTGGCACGGAGTC	ATGGTGGCACGGAGTC	mmu-miR-546	127.7	2.7327	10.0578	2.99283e-05	214.033	2.17111	63.9804	1.15634e-07	123.967	2.32688	3.18957	1.26957e-05
	mmu-miR-547	X	65241579	-	CTTGGTACATCTTTGAGTGA	CTTGGTACATCTTTGAGTGAG	mmu-miR-547	2598.72	46.0098	202.07	3.678e-38	4733.13	73.1768	836.898	3.678e-38	5651.43	85.3669	235.708	3.678e-38
	mmu-miR-551b	3	29315800	+	CGACCCATACTTGGTTTC	GCGACCCATACTTGGTTTCAG	mmu-miR-551b	154.075	2.93892	8.10653	4.12957e-10	171.533	1.8045	14.885	8.4779e-05	170.7	2.70028	20.1055	2.48346e-17
	mmu-miR-551b:9.1	0	0	+	CCATACTTGGTTTCAGT	CGACCCATACTTGGTTTCAGTG	mmu-miR-551b:9.1	90.3	1.99755	8.01041	0.112807	97.5333	1.20294	9.30609	0.332457	91.0333	1.66941	3.12143	0.100593
	mmu-miR-568	16	43640777	+	ATGTATAAATGTATACACAC	ATGTATAAATGTATACACAC	mmu-miR-568	77.825	1.79269	2.65	0.442132	85.6	1.17934	5.48088	0.530671	75.1	1.43258	0.9	0.547307
	mmu-miR-574-3p	5	65361602	+	GCTCATGCACACACCCAC	CACGCTCATGCACACACCCACA	mmu-miR-574-3p	6502.82	97.594	306.935	3.678e-38	9908.37	124.773	1614.16	3.678e-38	7342.97	100.003	465.576	3.678e-38
	mmu-miR-574-5p	5	65361566	+	TGAGTGTGTGTGTGTGAG	TGAGTGTGTGTGTGTGAGTGTGT	mmu-miR-574-5p	2882.97	56.0158	788.893	3.678e-38	8160.53	110.672	2826.25	3.678e-38	2875.9	47.5448	445.657	3.678e-38
	mmu-miR-582-3p	13	110114986	+	GTTGAACAACTGAACCCAA	CCTGTTGAACAACTGAACCCAA	mmu-miR-582-3p	207.075	4.90907	135.567	3.17774e-26	309.633	8.73203	337.258	3.678e-38	3825.13	58.7441	775.671	3.678e-38
	mmu-miR-582-5p	13	110114947	+	TACAGTTGTTCAACCAGTTACT	TACAGTTGTTCAACCAGTTACT	mmu-miR-582-5p	911.925	18.1321	317.918	3.678e-38	726.067	11.9787	214.329	3.678e-38	7442.1	102.357	1826.43	3.678e-38
	mmu-miR-590-3p	0	0	+	TAATTTTATGTATAAGCTAGT	TAATTTTATGTATAAGCTAGT	mmu-miR-590-3p	59.65	1.39642	1.63401	0.898887	60.2	0.951778	1.47986	0.886894	59.3	1.22181	1.47309	0.93574
	mmu-miR-590-5p	0	0	+	GAGCTTATTCATAAAAGTGCAG	GAGCTTATTCATAAAAGTGCAG	mmu-miR-590-5p	93.85	2.25289	3.38477	0.0768907	168.833	1.79942	75.2128	0.00114448	100	1.96206	4.16173	0.0196842
	mmu-miR-592	6	27886734	-	TGTGTCAATATGCGATGA	ATTGTGTCAATATGCGATGATGT	mmu-miR-592	856.475	16.0224	371.467	3.678e-38	1145.1	19.7028	317.198	3.678e-38	1224.3	20.6687	251.77	3.678e-38
	mmu-miR-598	14	64346072	+	TCATCGTCGTCATCGTTA	TACGTCATCGTCGTCATCGTTA	mmu-miR-598	1264.65	23.0423	146.824	3.678e-38	1142.03	18.8294	515.184	3.678e-38	1548.77	24.6299	353.492	3.678e-38
	mmu-miR-615-3p	15	102845399	+	GAGCCTGGGTCTCCCTCT	TCCGAGCCTGGGTCTCCCTCTT	mmu-miR-615-3p	753.675	16.3402	31.7586	3.678e-38	993.9	18.3987	138.341	3.678e-38	862.133	18.4072	106.017	3.678e-38
	mmu-miR-615-5p	15	102845356	+	TCCCCGGTGCTCGGAT	GGGGGTCCCCGGTGCTCGGATC	mmu-miR-615-5p	177.925	3.57456	25.9932	8.76548e-16	132.5	1.47529	24.1851	0.028965	152.733	3.21963	36.6953	1.60923e-11
	mmu-miR-652	X	139173602	+	ATGGCGCCACTAGGGTT	AATGGCGCCACTAGGGTTGTG	mmu-miR-652	5073.93	81.2158	342.182	3.678e-38	6210.27	81.8537	458.302	3.678e-38	5342.13	80.6976	967.785	3.678e-38
	mmu-miR-653	6	3671376	-	GTGTTGAAACAATCTCTACTG	GTGTTGAAACAATCTCTACTG	mmu-miR-653	71.5	1.75873	2.06074	0.64115	76.3333	1.11144	4.15853	0.691025	71.8667	1.51075	1.02144	0.6539
	mmu-miR-654-3p	12	110961479	+	GTCTGCTGACCATCACCT	TATGTCTGCTGACCATCACCTT	mmu-miR-654-3p	829.45	16.8611	467.964	3.678e-38	3374.07	46.9701	1611.56	3.678e-38	453.7	10.9798	361.138	3.678e-38
	mmu-miR-654-5p	12	110961444	+	GTAAGCTGCAGAACATGTGT	TGGTAAGCTGCAGAACATGTGT	mmu-miR-654-5p	167.575	3.39377	8.89246	1.82934e-13	280.067	2.38842	96.9275	1.55497e-15	175.433	3.06146	9.08974	1.34e-18
	mmu-miR-665	12	110824577	+	ACCAGGAGGCTGAGGTC	ACCAGGAGGCTGAGGTCCCT	mmu-miR-665	465.325	11.6223	417.761	3.678e-38	1239.83	24.3133	2015.13	3.678e-38	79.8667	1.48456	14.4431	0.353395
	mmu-miR-666-3p	12	110955349	+	TGCAGCGTGATCGCCT	GGCTGCAGCGTGATCGCCTGCT	mmu-miR-666-3p	80.9	1.86952	4.08003	0.359113	133.467	1.39279	46.8504	0.0471597	80.8	1.48456	2.53574	0.350208
	mmu-miR-666-5p	12	110955312	+	AGCGGGCACAGCTGTGA	AGCGGGCACAGCTGTGAGAGCC	mmu-miR-666-5p	209.65	5.96016	250.612	3.20417e-16	289.033	8.0943	382.928	3.678e-38	76.3333	1.47662	13.1508	0.479509
	mmu-miR-667	12	110958270	+	TGACACCTGCCACCCAG	TGACACCTGCCACCCAGCCCAAG	mmu-miR-667	415.125	7.89893	84.594	3.678e-38	495.733	4.94585	198.07	3.678e-38	824.867	14.1222	437.969	3.678e-38
	mmu-miR-668	12	110972983	+	TCACTCGGCTCGGCCCA	TGTCACTCGGCTCGGCCCACTACC	mmu-miR-668	475.175	9.27087	425.695	3.678e-38	598.067	16.7722	806.953	3.678e-38	546.7	10.5578	347.402	3.678e-38
	mmu-miR-669a	2,2,2	1.04318e+23	+,+,+	GTTGTGTGTGCATGTTCA	AGTTGTGTGTGCATGTTCATGT	mmu-miR-669a	1287.8	22.5552	601.413	3.678e-38	1343.6	19.955	767.786	3.678e-38	1058.8	16.8836	188.624	3.678e-38
	mmu-miR-669b	2	10389440	+	GTTTTGTGTGCATGTGCA	AGTTTTGTGTGCATGTGCATGT	mmu-miR-669b	225.075	4.48396	68.3243	6.59398e-35	304.433	2.65438	138.24	3.17643e-18	215.867	3.96422	37.2119	2.12766e-35
	mmu-miR-669c	2	10430945	+	AGTTGTGTGTGGATGTGTG	ATAGTTGTGTGTGGATGTGTGT	mmu-miR-669c	1310.1	23.3002	294.026	3.678e-38	1877.8	30.8142	1089.46	3.678e-38	944.933	14.7255	369.253	3.678e-38
	mmu-miR-669d	2	10390010	+	ACTTGTGTGTGCATGTATATGT	ACTTGTGTGTGCATGTATATGT	mmu-miR-669d	1845.25	33.099	520.192	3.678e-38	1352.93	21.1535	691.852	3.678e-38	1724.13	25.9856	666.269	3.678e-38
	mmu-miR-669e	2	10389163	+	TGTCTTGTGTGTGCATGTTC	TGTCTTGTGTGTGCATGTTCAT	mmu-miR-669e	459.5	11.1275	315.461	3.678e-38	787.967	14.5613	801.443	3.678e-38	277.533	4.38148	195.744	3.678e-38
	mmu-miR-669f	2	10388911	+	CATATACATACACACACACGTAT	CATATACATACACACACACGTAT	mmu-miR-669f	3054.78	60.719	1496.72	3.678e-38	3645.73	51.7271	2259.2	3.678e-38	2825	46.626	549.487	3.678e-38
	mmu-miR-669g	2	10398796	+	GCATTGTATGTGTTGACATGA	TGCATTGTATGTGTTGACATGAT	mmu-miR-669g	60.25	1.48125	2.3615	0.889541	581.467	15.3143	909.702	3.678e-38	58.8333	1.29857	1.04083	0.939196
	mmu-miR-669h-3p	2	10439845	+	TATGCATATACACACATGCACA	TATGCATATACACACATGCACA	mmu-miR-669h-3p	124.25	2.70221	6.70348	9.12548e-05	472.2	5.95956	365.264	3.678e-38	126.367	2.29947	2.71355	5.21563e-06
	mmu-miR-669h-5p	2	10439800	+	TGCATGGGTGTATAGTTGAG	ATGCATGGGTGTATAGTTGAGTGC	mmu-miR-669h-5p	102.375	2.26914	57.6306	0.0607686	103	1.32695	20.6269	0.274926	105.5	1.87345	49.6344	0.0116322
	mmu-miR-669i	2	10439297	+	TGCATATACACACATGCATAC	TGCATATACACACATGCATAC	mmu-miR-669i	170.175	3.62034	99.15	5.56385e-15	98.1333	1.84391	67.869	0.100377	110.1	2.17742	83.8313	0.00679982
	mmu-miR-669j	2	10399615	+	GCATATACTCACATGCAAACA	TGCATATACTCACATGCAAACA	mmu-miR-669j	85.1	1.86032	1.46515	0.22912	98.1333	1.25973	10.2846	0.320279	90.5333	1.61731	3.07463	0.107755
	mmu-miR-669k	2	10396990	+	ATATACACGCATGCAA	TATGCATATACACGCATGCAA	mmu-miR-669k	71.55	1.70524	0.967815	0.632125	84.9667	1.15073	11.537	0.56983	172.033	4.10468	171.016	6.33926e-14
	mmu-miR-670	2	94101537	-	CCCTGAGTGTATGTGGTG	ATCCCTGAGTGTATGTGGTGAA	mmu-miR-670	166.225	4.35631	107.764	2.74128e-13	161.367	1.9039	43.2879	0.00142962	115.133	2.2792	0.288675	0.000320532
	mmu-miR-671-3p	5	24097988	+	GGTTCTCAGGGCTCCA	TCCGGTTCTCAGGGCTCCACC	mmu-miR-671-3p	1367.9	26.7147	433.547	3.678e-38	2029.67	32.5072	78.0841	3.678e-38	1169	20.4553	199.393	3.678e-38
	mmu-miR-671-5p	5	24097949	+	GAAGCCCTGGAGGGGCT	AGGAAGCCCTGGAGGGGCTGGAG	mmu-miR-671-5p	185.65	4.65875	155.226	2.96557e-13	141.067	1.43258	27.2619	0.0131113	100	1.7852	3.14325	0.0197306
	mmu-miR-672	X	101311590	-	GAGGTTGGTGTACTGTGTG	TGAGGTTGGTGTACTGTGTGTGA	mmu-miR-672	579.15	13.3389	369.709	3.678e-38	792.2	14.9926	638.579	3.678e-38	844.333	15.6336	747.271	3.678e-38
	mmu-miR-673-3p	12	110810253	+	GCTGAGTTCTGTGCACC	TCCGGGGCTGAGTTCTGTGCACC	mmu-miR-673-3p	62.5	1.59195	2.14321	0.855747	65.5	1.02963	2.42487	0.835374	62.8	1.4344	0.69282	0.885942
	mmu-miR-673-5p	12	110810213	+	CACAGCTCTGGTCCTTG	CTCACAGCTCTGGTCCTTGGAG	mmu-miR-673-5p	1218.85	23.6635	332.528	3.678e-38	1735.13	28.3462	786.3	3.678e-38	461.033	8.26466	200.707	3.678e-38
	mmu-miR-674	2	117010886	+	CACTGAGATGGGAGTGGT	GCACTGAGATGGGAGTGGTGTA	mmu-miR-674	9508.25	130.223	976.82	3.678e-38	14767.5	173.787	2178.7	3.678e-38	9382.33	136.026	1003.36	3.678e-38
	mmu-miR-674*	2	117010921	+	ACAGCTCCCATCTCAGAA	CACAGCTCCCATCTCAGAACAA	mmu-miR-674*	5806.5	89.3122	416.334	3.678e-38	6565.43	92.6632	786.387	3.678e-38	5900.3	91.3118	378.352	3.678e-38
	mmu-miR-675-3p	7	149763005	-	TGTATGCCCTAACCGCT	CTGTATGCCCTAACCGCTCAGT	mmu-miR-675-3p	79.075	1.77676	25.3238	0.320414	71.2667	1.03089	2.58908	0.760979	72.6667	1.32793	4.17892	0.639112
	mmu-miR-675-5p	7	149763039	-	TGCGGAAAGGGCCCACA	TGGTGCGGAAAGGGCCCACAGT	mmu-miR-675-5p	198.775	4.34189	33.9483	2.48806e-21	843.1	23.458	1140.63	3.678e-38	328.867	6.82604	183.563	3.678e-38
	mmu-miR-676	X	97576489	+	GTCCTGAGGTTGTTGAG	CCGTCCTGAGGTTGTTGAGCT	mmu-miR-676	4446.88	66.5421	411.039	3.678e-38	6814.5	88.9142	666.083	3.678e-38	4964.57	71.6944	787.675	3.678e-38
	mmu-miR-676*	X	97576452	+	ACTCTACAACCTTAGGACT	ACTCTACAACCTTAGGACTTGC	mmu-miR-676*	298.075	7.27944	250.057	3.678e-38	169.533	1.76309	117.544	0.000558172	440.9	7.03901	183.992	3.678e-38
	mmu-miR-677	10	127522346	+	TTCAGTGATGATTAGCTTCTG	TTCAGTGATGATTAGCTTCTGA	mmu-miR-677	607.025	14.7856	240.998	3.678e-38	449.367	9.13007	249.012	3.678e-38	660.8	15.4886	236.166	3.678e-38
	mmu-miR-678	10	75670100	-	TCTCGGTGCAAGGACTG	GTCTCGGTGCAAGGACTGGAGG	mmu-miR-678	106.375	2.44869	10.262	0.00991322	183.3	1.85944	56.2904	6.09205e-05	301.267	6.92018	334.493	3.678e-38
	mmu-miR-679	12	110953796	+	GGACTGTGAGGTGACTCTT	GGACTGTGAGGTGACTCTTGGT	mmu-miR-679	352.375	8.82352	24.8552	3.678e-38	739.667	14.1271	105.513	3.678e-38	404.867	10.6972	133.359	3.678e-38
	mmu-miR-680	6,X,12	1.29642e+25	+,+,-	GGCATCTGCTGACATGG	GGGCATCTGCTGACATGGGGG	mmu-miR-680	64.6	1.49738	2.42625	0.817587	72.7333	1.07314	4.56107	0.715379	67.3	1.36865	2.27156	0.793296
	mmu-miR-681	12	70864931	-	AGCCTCGCTGGCAGGCA	CAGCCTCGCTGGCAGGCAGCT	mmu-miR-681	120.3	2.39587	44.8097	0.00109705	323.867	4.39176	300.234	6.62806e-22	95.3667	1.70428	3.15647	0.0491492
	mmu-miR-682	13	75782566	+	CTGCAGTCACAGTGAAGTC	CTGCAGTCACAGTGAAGTCTG	mmu-miR-682	1342.92	25.7336	292.546	3.678e-38	2313.47	33.3116	1668.13	3.678e-38	2387.87	40.7566	1910.75	3.678e-38
	mmu-miR-683	13	50640034	-	CTGCTGTAAGCTGTGTCC	CCTGCTGTAAGCTGTGTCCTC	mmu-miR-683	455.25	9.68615	100.945	3.678e-38	1096.03	16.8488	648.952	3.678e-38	613.733	10.227	152.615	3.678e-38
	mmu-miR-684	2,4	8046889011061300	-,+	AGTTTTCCCTTCAAGTCAA	AGTTTTCCCTTCAAGTCAA	mmu-miR-684	105.9	2.49293	73.3472	0.00149325	251.767	3.67966	309.293	9.61928e-12	125.367	3.3241	96.2456	4.64225e-06
	mmu-miR-685	14	51427187	-	TCAATGGCTGAGGTGAG	TCAATGGCTGAGGTGAGGCAC	mmu-miR-685	2011.62	36.5926	209.255	3.678e-38	3104.77	44.1173	2850.29	3.678e-38	1339.27	20.5536	319.115	3.678e-38
	mmu-miR-686	14	55235605	-	TGCTTCCCAGACGGTGA	ATTGCTTCCCAGACGGTGAAGA	mmu-miR-686	322.175	8.03442	284.846	3.678e-38	1179.9	22.9058	1914.44	3.678e-38	86.2	1.53776	24.0857	0.16518
	mmu-miR-687	14	73606637	-	ATCCTGGAATGCAGCAA	CTATCCTGGAATGCAGCAATGA	mmu-miR-687	62.475	1.42698	1.55858	0.854311	65.7333	1.04538	3.7072	0.831859	65.3	1.31059	0.360555	0.836301
	mmu-miR-688	15	102502253	-	TCGCAGGCGACTACTTAT	TCGCAGGCGACTACTTATTC	mmu-miR-688	57.75	1.39853	1.85921	0.924447	58.5333	1.00716	1.74738	0.901134	58.6333	1.30259	0.70946	0.941238
	mmu-miR-689	1,16	1.69271e+16	-,+	TCCCCGCTCGGCGGGGT	CGTCCCCGCTCGGCGGGGTCC	mmu-miR-689	114.475	2.83051	56.1521	0.000861379	166.033	4.05066	154.73	4.65867e-08	327.833	5.88051	274.216	3.678e-38
	mmu-miR-690	16	28600048	-	AGGCTAGGCTCACAACC	AAAGGCTAGGCTCACAACCAAA	mmu-miR-690	12680.5	165.642	1707.6	3.678e-38	17979	224.46	5288.02	3.678e-38	11696.9	149.098	196.89	3.678e-38
	mmu-miR-691	16	74342272	-	TTCCTGAAGAGAGGCAGA	ATTCCTGAAGAGAGGCAGAAAA	mmu-miR-691	110.775	2.655	3.74288	0.00337111	283.333	5.95649	147.354	1.69697e-26	118.5	2.43155	6.42806	9.07702e-05
	mmu-miR-692	4,17	1251820487099620	+,-	TCTCTTTGAGCGCCTCA	ATCTCTTTGAGCGCCTCACTC	mmu-miR-692	110	2.41218	11.3681	0.0048521	189.767	1.45746	75.9221	3.5014e-05	107.867	1.95972	0.80829	0.00281811
	mmu-miR-693-3p	17	46368529	+	CTTTCAGATGTGGCTGTA	GCAGCTTTCAGATGTGGCTGTAA	mmu-miR-693-3p	88.85	2.06867	2.43653	0.152478	329.7	4.11485	407.675	6.9052e-16	87.3333	1.61488	1.80093	0.165697
	mmu-miR-693-5p	17	46368499	+	AGCCACATCCGAAAGTT	CAGCCACATCCGAAAGTTTTC	mmu-miR-693-5p	88.325	1.85028	4.51396	0.167728	84.5667	1.13529	2.9023	0.540187	86.2667	1.57513	4.54459	0.196279
	mmu-miR-694	18	66378949	-	CTGAAAATGTTGCCTGAA	CTGAAAATGTTGCCTGAAG	mmu-miR-694	436.95	8.65884	55.8421	3.678e-38	657.133	7.43714	173.414	3.678e-38	495.867	7.49632	38.4313	3.678e-38
	mmu-miR-695	2	155182566	+	GATTGGGCATAGGTGACT	AGATTGGGCATAGGTGACTGAA	mmu-miR-695	83.275	2.07931	2.70971	0.287356	94.7333	1.21644	20.8368	0.421102	80.5333	1.7146	1.69214	0.359009
	mmu-miR-696	0	0	+	GCGTGTGCTTGCTGTGG	GCGTGTGCTTGCTGTGGG	mmu-miR-696	451	9.99873	410.714	3.678e-38	300.2	4.1296	84.8939	1.85044e-23	344.9	6.19698	141.295	3.678e-38
	mmu-miR-697	4	124409011	+	ACATCCTGGTCCTGTGG	AACATCCTGGTCCTGTGGAGA	mmu-miR-697	87.95	2.0644	3.0304	0.173435	93.7667	1.22181	8.24399	0.398128	84.6333	1.6592	3.8553	0.235268
	mmu-miR-698	4	124421095	+	ATTCTCGTTTCCTTCCCT	CATTCTCGTTTCCTTCCCT	mmu-miR-698	74.075	1.75845	0.801561	0.555834	78.6333	1.14104	4.36616	0.653403	75.3333	1.52453	1.50111	0.541251
	mmu-miR-699	4	43505713	-	GGCAGTGCGACCTGGCT	AGGCAGTGCGACCTGGCTCG	mmu-miR-699	917.7	19.0046	326.189	3.678e-38	686.1	16.2439	941.915	3.678e-38	1072.53	17.819	554.388	3.678e-38
	mmu-miR-700	4	134972497	-	ACGCGGGAACCGAGTCC	CACGCGGGAACCGAGTCCACC	mmu-miR-700	1477.33	25.8422	242.418	3.678e-38	1368.77	22.6112	572.136	3.678e-38	1319.2	20.5755	295.508	3.678e-38
	mmu-miR-701	5	111433188	+	TAGCCGCTGAAATAGATG	TTAGCCGCTGAAATAGATGGA	mmu-miR-701	1578.67	29.0603	290.014	3.678e-38	1881.1	32.9661	1862.47	3.678e-38	1574.93	26.1757	221.343	3.678e-38
	mmu-miR-702	5	137467389	+	TGCCCACCCTTTACCCC	TGCCCACCCTTTACCCCGCTC	mmu-miR-702	385.675	8.83215	277.516	3.678e-38	207.4	6.80734	233.138	3.02851e-16	114.767	2.2019	61.2968	0.00117907
	mmu-miR-703	5	98904656	-	AAAACCTTCAGAAGGAAAGA	AAAACCTTCAGAAGGAAAGAA	mmu-miR-703	450.325	10.2493	179.836	3.678e-38	1945.4	33.9516	1311.04	3.678e-38	503.767	9.4593	319.745	3.678e-38
	mmu-miR-704	6	47753610	-	GACATGTGCTCTGCTCCT	AGACATGTGCTCTGCTCCTAG	mmu-miR-704	81.45	1.84045	10.6516	0.36309	87.2	1.17934	5.9808	0.507721	96.6333	1.59164	33.0642	0.0264559
	mmu-miR-705	6	85286355	-	GTGGGAGGTGGGGTGG	GGTGGGAGGTGGGGTGGGCA	mmu-miR-705	136.5	2.70783	43.9172	4.61128e-07	875.7	12.6479	639.972	3.678e-38	108.8	1.95137	61.8394	0.000809981
	mmu-miR-706	6	119984330	-	GAGAAACCCTGTCTCAAAA	AGAGAAACCCTGTCTCAAAAAA	mmu-miR-706	12295	165.639	830.079	3.678e-38	19640.8	246.401	4217.38	3.678e-38	12926.8	170.928	1649.61	3.678e-38
	mmu-miR-707	7	52105074	+	AGTCATGCCGCTTGCCT	CAGTCATGCCGCTTGCCTACG	mmu-miR-707	236.9	5.23693	21.3077	2.77506e-36	513.867	7.39811	127.96	3.678e-38	289.5	6.69699	114.485	3.678e-38
	mmu-miR-708	7	103397959	+	GGAGCTTACAATCTAGCTGG	AAGGAGCTTACAATCTAGCTGGG	mmu-miR-708	11952.6	161.202	1080.24	3.678e-38	21075.2	261.513	1367.12	3.678e-38	12219.2	147.999	1500.93	3.678e-38
	mmu-miR-708*	7	103398005	+	CAACTAGACTGTGAGCTTCTA	CAACTAGACTGTGAGCTTCTAG	mmu-miR-708*	116.975	2.71705	24.7069	0.000393791	170.9	1.57015	39.3669	0.000262547	116.967	1.95538	6.74117	0.000178434
	mmu-miR-709	8	86610065	+	GGAGGCAGAGGCAGGAG	GGAGGCAGAGGCAGGAGGA	mmu-miR-709	12072.2	163.914	755.678	3.678e-38	10069.7	133.047	2072.51	3.678e-38	14827.4	198.093	4604.45	3.678e-38
	mmu-miR-710	8	66993220	-	CAAGTCTTGGGGAGAGTT	CCAAGTCTTGGGGAGAGTTGAG	mmu-miR-710	85.65	1.94986	7.63217	0.231043	101.133	1.25973	10.6006	0.264543	80.7	1.48456	2.60576	0.351559
	mmu-miR-711	9	108872014	+	ACCCGGGGAGAGATGTA	GGGACCCGGGGAGAGATGTAAG	mmu-miR-711	77.95	1.65535	1.30767	0.433943	84	1.15978	2.96142	0.549943	79.4333	1.45925	0.64291	0.394051
	mmu-miR-712	0	0	+	CCTTCACCCGGGCGGT	CTCCTTCACCCGGGCGGTACC	mmu-miR-712	3692.53	65.9702	1199.16	3.678e-38	5923.43	83.6683	1536.07	3.678e-38	3958.9	66.893	1427.93	3.678e-38
	mmu-miR-712*	0	0	+	GAGTCACCCCCGGGTGT	TGCGAGTCACCCCCGGGTGTTG	mmu-miR-712*	130.45	2.9237	7.03965	1.1357e-05	179	1.74671	41.3111	5.75736e-05	134.1	2.45455	6.16117	1.81561e-07
	mmu-miR-713	13	62862166	+	TGCACTGAAGGCACACA	TGCACTGAAGGCACACAGC	mmu-miR-713	93.7	2.20338	19.0433	0.0780431	79.0667	1.09186	3.47899	0.642622	78.4	1.45925	3.1607	0.434038
	mmu-miR-714	0	0	+	ACGAGGGCCGGTCGGT	CGACGAGGGCCGGTCGGTCGC	mmu-miR-714	80.2	1.77979	2.24648	0.374402	389.267	11.1234	503.559	4.59111e-36	76.9667	1.37817	1.50444	0.480083
	mmu-miR-715	17	39981094	+	TCCGTGCACACCCCCG	CTCCGTGCACACCCCCGCGTG	mmu-miR-715	370.05	9.17066	301.08	3.678e-38	1022.77	19.2439	170.315	3.678e-38	282.867	6.90496	228.53	3.678e-38
	mmu-miR-717	X	49775660	-	CTCAGACAGAGATACCTTCTCT	CTCAGACAGAGATACCTTCTCT	mmu-miR-717	75.175	1.89375	2.0998	0.52899	74.5	1.16653	4.50333	0.699702	73.8	1.5271	2.22711	0.590695
	mmu-miR-718	X	71269217	-	TTCCGCCCGGCCGGGT	CTTCCGCCCGGCCGGGTGTCG	mmu-miR-718	94.3	2.07459	4.35507	0.0776578	129.533	1.28998	21.8807	0.0399289	95.3667	1.67839	1.05987	0.0480712
	mmu-miR-719	14	60847732	-	TCTCGGCTACAGAAAAATG	ATCTCGGCTACAGAAAAATGTT	mmu-miR-719	529.475	10.9412	151.401	3.678e-38	2961.97	47.3306	1931.11	3.678e-38	367.7	7.19994	56.1554	3.678e-38
	mmu-miR-720	3	88920550	-	ATCTCGCTGGGGCCTCC	ATCTCGCTGGGGCCTCCA	mmu-miR-720	11608.8	152.711	706.269	3.678e-38	13448.9	169.524	3728.32	3.678e-38	11049	151.704	356.079	3.678e-38
	mmu-miR-721	5	136851668	-	GTGCAATTAAAAGGGGG	CAGTGCAATTAAAAGGGGGAA	mmu-miR-721	83.875	1.96239	2.73663	0.272272	105.233	1.22927	14.0607	0.233368	86.6	1.61123	2.22711	0.188326
	mmu-miR-741	X	64050007	-	GAGATGCCATTCTATGTA	TGAGAGATGCCATTCTATGTAGA	mmu-miR-741	334.3	9.9412	498.029	3.678e-38	75.0333	1.08826	8.04508	0.722822	68.3	1.37817	0.360555	0.763316
	mmu-miR-742	X	64033573	-	GAAAGCCACCATGCTGG	GAAAGCCACCATGCTGGGTAAA	mmu-miR-742	115.8	2.48683	15.4598	0.00131845	98.2	1.40633	13.7357	0.240814	155.433	2.41049	84.4171	8.97103e-14
	mmu-miR-742*	X	64033608	-	TACTCACATGGTTGCTAATCA	TACTCACATGGTTGCTAATCA	mmu-miR-742*	1696.45	30.3631	267.65	3.678e-38	5033.47	62.6181	1295.3	3.678e-38	1508.37	30.3539	1095.82	3.678e-38
	mmu-miR-743a	X	64029957	-	AGACACCAAGCTGAGTA	GAAAGACACCAAGCTGAGTAGA	mmu-miR-743a	98.125	2.17021	31.1415	0.0353123	89.4	1.21752	11.985	0.491174	74	1.46818	0.608276	0.583547
	mmu-miR-743b-3p	X	64030463	-	GAAAGACATCATGCTGAATA	GAAAGACATCATGCTGAATAGA	mmu-miR-743b-3p	109.975	2.45549	40.599	0.00452153	131.967	1.36291	46.0006	0.0532159	85.4333	1.70428	0.92376	0.21221
	mmu-miR-743b-5p	X	64030498	-	TGTTCAGACTGGTGTCCAT	TGTTCAGACTGGTGTCCATCA	mmu-miR-743b-5p	59.725	1.5227	1.56072	0.90025	71.1333	1.05409	12.1919	0.777656	60.8	1.28592	1.57162	0.915139
	mmu-miR-744	11	65548323	-	GGGGCTAGGGCTAACAGC	TGCGGGGCTAGGGCTAACAGCA	mmu-miR-744	2013.42	36.1568	742.972	3.678e-38	5273.03	76.7764	2262.79	3.678e-38	1895.73	31.0782	332.503	3.678e-38
	mmu-miR-744*	11	65548266	-	TTGCCACTAACCTCAACC	CTGTTGCCACTAACCTCAACCT	mmu-miR-744*	946.3	18.7223	365.471	3.678e-38	973.4	17.7502	604.295	3.678e-38	846.667	15.7011	59.7897	3.678e-38
	mmu-miR-758	12	110951067	+	TTGTGACCTGGTCCACTA	TTTGTGACCTGGTCCACTA	mmu-miR-758	111.25	2.75628	8.35085	0.00333211	214	2.75871	57.7042	6.53416e-08	153.2	4.30504	57.8972	7.80436e-13
	mmu-miR-759	14	80138266	+	CAGAGTGCAAACAATTT	GCAGAGTGCAAACAATTTTGAC	mmu-miR-759	496.775	9.95431	402.246	3.678e-38	601.767	12.2288	883.05	3.678e-38	338.033	6.41343	305.847	3.678e-38
	mmu-miR-760	3	121996553	-	CGGCTCTGGGTCTGTGGGGA	CGGCTCTGGGTCTGTGGGGA	mmu-miR-760	234.25	4.55748	99.3204	2.44144e-33	661.367	8.24827	487.043	3.678e-38	192.967	3.91962	50.4395	7.47925e-24
	mmu-miR-760:9.1	0	0	+	GAAATTCGGCTCTGGGTCT	GAAATTCGGCTCTGGGTCTGTGGGGAG	mmu-miR-760:9.1	437.375	9.65249	198.124	3.678e-38	2376.53	34.1076	2192.22	3.678e-38	571	12.3523	576.818	3.678e-38
	mmu-miR-761	4	108690273	+	CAGGGTGAAACTGACAC	GCAGCAGGGTGAAACTGACACA	mmu-miR-761	852.475	18.1745	464.185	3.678e-38	4772.33	59.6317	2329.66	3.678e-38	770.333	12.8729	210.875	3.678e-38
	mmu-miR-762	7	134852047	+	GGGGCTGGGGCCGGGACAGAGC	GGGGCTGGGGCCGGGACAGAGC	mmu-miR-762	769.775	15.4707	287.1	3.678e-38	1627.13	26.9346	664.088	3.678e-38	877.833	15.1205	382.63	3.678e-38
	mmu-miR-763	10	119885130	-	AGCTGGGAAGAACCAGT	CCAGCTGGGAAGAACCAGTGGC	mmu-miR-763	1164.55	24.0649	638.99	3.678e-38	2610.1	38.0434	2195.96	3.678e-38	981.1	17.127	248.363	3.678e-38
	mmu-miR-764-3p	X	143436866	+	AGGCCATAGTGGCAACT	AGGAGGCCATAGTGGCAACTGT	mmu-miR-764-3p	126.25	3.23325	46.5834	1.30877e-05	555.767	10.6198	406.954	3.678e-38	119.6	2.82473	41.1715	2.39383e-05
	mmu-miR-764-5p	X	143436827	+	GGTGCTCACATGTCCTC	GGTGCTCACATGTCCTCCT	mmu-miR-764-5p	2055.9	37.0016	891.216	3.678e-38	4015.1	53.021	2055.32	3.678e-38	1895.47	30.6937	575.408	3.678e-38
	mmu-miR-770-3p	12	110801953	+	CGTGGGCCTGACGTGGAGCTGG	CGTGGGCCTGACGTGGAGCTGG	mmu-miR-770-3p	521.925	12.1091	409.073	3.678e-38	359.433	6.03031	417.706	1.19655e-29	474.733	9.42351	331.708	3.678e-38
	mmu-miR-770-5p	12	110801919	+	CACGTGTCTGGGCCAC	AGCACCACGTGTCTGGGCCACG	mmu-miR-770-5p	2579.53	44.6399	1091.5	3.678e-38	2052.93	36.2897	1425.47	3.678e-38	3436.83	57.4794	179.191	3.678e-38
	mmu-miR-7a	7,13	8603318058494220	+,-	TGGAAGACTAGTGATTTTGTT	TGGAAGACTAGTGATTTTGTTGT	mmu-miR-7a	6402.3	99.0737	713.658	3.678e-38	7387.3	107.813	2707.29	3.678e-38	6039.57	92.4997	857.876	3.678e-38
	mmu-miR-7a*	13	58494183	-	ACAAATCACAGTCTGCCATA	CAACAAATCACAGTCTGCCATA	mmu-miR-7a*	6615.95	91.361	562.117	3.678e-38	13283.9	192.866	5536.93	3.678e-38	8158.9	105.326	863.663	3.678e-38
	mmu-miR-7b	17	56382439	+	TGGAAGACTTGTGATTTTGT	TGGAAGACTTGTGATTTTGTTGT	mmu-miR-7b	476.95	9.06826	235.684	3.678e-38	481.6	7.03957	235.357	3.678e-38	279.6	4.73618	73.8123	3.678e-38
	mmu-miR-801:9.1	0	0	+	GATTGCTGTGCGTGCGGAATCGAC	GATTGCTGTGCGTGCGGAATCGAC	mmu-miR-801:9.1	243.375	5.18378	101.494	3.678e-38	129.367	1.45746	23.8894	0.0342535	185.067	3.26358	41.137	5.04255e-23
	mmu-miR-802	16	93369981	+	TCAGTAACAAAGATTCATC	TCAGTAACAAAGATTCATCCTT	mmu-miR-802	99.9	2.19201	7.0361	0.0341514	98.8	1.34261	4.60326	0.293843	103.8	1.88388	8	0.00902045
	mmu-miR-804	11	50171323	-	TGTGAGTTGTTCCTCAC	TGTGAGTTGTTCCTCACCTGGA	mmu-miR-804	85.125	1.9798	6.54083	0.241927	111.033	1.25973	24.1276	0.187054	86	1.68965	2.20681	0.195502
	mmu-miR-805	MT	16189	-	GAATTGATCAGGACATAG	GAATTGATCAGGACATAGGG	mmu-miR-805	15996.6	225.137	973.545	3.678e-38	16827.5	234.296	1408.04	3.678e-38	14614.3	200.729	1338.41	3.678e-38
	mmu-miR-871	X	64063670	-	TATTCAGATTAGTGCCAGTCAT	TATTCAGATTAGTGCCAGTCATG	mmu-miR-871	237.375	7.92248	205.689	3.678e-38	228.633	2.21817	85.5337	1.05465e-08	455.767	11.8139	385.158	3.678e-38
	mmu-miR-872	4	94331857	+	AAGGTTACTTGTTAGTTC	AAGGTTACTTGTTAGTTCAGG	mmu-miR-872	113.425	2.22045	23.9887	0.000954345	188.467	1.91075	77.1385	2.33258e-05	112.133	1.83609	15.2126	0.000708929
	mmu-miR-872*	4	94331896	+	GAACTATTGCAGTAGCCTCC	TGAACTATTGCAGTAGCCTCCT	mmu-miR-872*	8740.73	120.361	863.008	3.678e-38	3614.3	56.2141	1049.67	3.678e-38	9852.83	121.786	696.724	3.678e-38
	mmu-miR-873	4	36615610	-	CAGGAACTTGTGAGTCTCCT	GCAGGAACTTGTGAGTCTCCT	mmu-miR-873	654.625	15.2567	404.751	3.678e-38	496.567	5.45558	168.347	3.678e-38	397.233	7.88429	33.0476	3.678e-38
	mmu-miR-874	13	58124518	-	CCCTGGCCCGAGGGAC	CTGCCCTGGCCCGAGGGACCGA	mmu-miR-874	594.575	13.2571	311.665	3.678e-38	187.1	3.63462	97.7026	1.14711e-08	528.333	10.0019	83.6728	3.678e-38
	mmu-miR-875-3p	15	35590758	-	CCTGAAAATACTGAGGCTATG	CCTGAAAATACTGAGGCTATG	mmu-miR-875-3p	1515.78	29.7367	1023.34	3.678e-38	4245.73	57.9002	3058.11	3.678e-38	1759.23	28.5442	486.971	3.678e-38
	mmu-miR-875-5p	15	35590793	-	TATACCTCAGTTTTATCAGGTG	TATACCTCAGTTTTATCAGGTG	mmu-miR-875-5p	293.625	7.56449	246.273	3.678e-38	64.2667	0.992126	1.51438	0.846362	177.8	4.32019	195.727	4.10639e-15
	mmu-miR-876-3p	4	36592438	-	TAGTGGTTTACAAAGTAATTC	TAGTGGTTTACAAAGTAATTCA	mmu-miR-876-3p	69.4	1.60575	0.663325	0.695691	73.8667	1.07314	3.86954	0.728246	69.5667	1.37247	2.20303	0.722844
	mmu-miR-876-5p	4	36592477	-	TGGATTTCTCTGTGAATCACT	TGGATTTCTCTGTGAATCACTA	mmu-miR-876-5p	78.175	1.90536	2.06135	0.423541	90.7333	1.22821	10.1298	0.373702	77.2333	1.54961	2.92973	0.477938
	mmu-miR-877	17	36097760	-	AGAGGAGATGGCGCAG	GTAGAGGAGATGGCGCAGGG	mmu-miR-877	1237.45	23.0553	349.9	3.678e-38	2439.43	35.4854	1001.03	3.678e-38	708.533	11.5555	60.6795	3.678e-38
	mmu-miR-877*	17	36097698	-	CTTCTCCCTCCTCCCA	TGTCCTCTTCTCCCTCCTCCCA	mmu-miR-877*	2043.17	36.7525	317.335	3.678e-38	3266.23	42.8168	1622.81	3.678e-38	1770.6	25.6194	606.184	3.678e-38
	mmu-miR-878-3p	X	64054715	-	CATGACACCACACTGGG	GCATGACACCACACTGGGTAGA	mmu-miR-878-3p	151.775	3.37944	28.2023	3.69589e-09	347.333	3.63246	149.946	1.31757e-25	247.567	4.90831	193.679	3.678e-38
	mmu-miR-878-5p	X	64054751	-	TATCTAGTTGGATGTCAAGACA	TATCTAGTTGGATGTCAAGACA	mmu-miR-878-5p	150.675	3.00245	8.49642	3.33662e-09	169.233	1.86049	20.1659	0.000145393	130.6	2.21581	10.7852	1.16297e-06
	mmu-miR-879	5	9375713	+	AGAGGCTTATAGCTCTAAGCC	AGAGGCTTATAGCTCTAAGCC	mmu-miR-879	76.9	1.71756	2.31373	0.47403	80.2	1.10613	1.80278	0.608217	74.1667	1.42664	1.78979	0.574812
	mmu-miR-879*	5	9375747	+	TGGCTTCAAGCTTTCG	GCTTATGGCTTCAAGCTTTCGG	mmu-miR-879*	63.15	1.62064	3.03919	0.847636	69.4667	1.11613	3.08599	0.784984	64.1333	1.38997	1.19304	0.860798
	mmu-miR-880	X	64053737	-	TACTCCATCCTCTCTGAGTAGA	TACTCCATCCTCTCTGAGTAGA	mmu-miR-880	114.15	3.3761	116.034	0.000619419	56.6	0.930247	1.21244	0.911053	55.7	1.15073	1.01489	0.965862
	mmu-miR-881	X	64055151	-	AACTGTGTCTTTTCTGAATA	AACTGTGTCTTTTCTGAATAGA	mmu-miR-881	215.2	5.58763	152.698	1.21597e-35	112.8	1.20294	23.5332	0.159424	131.367	2.46359	42.101	2.54558e-07
	mmu-miR-881*	X	64055183	-	CAGAGAGATAACAGTCACATCT	CAGAGAGATAACAGTCACATCT	mmu-miR-881*	139.3	3.6701	104.633	1.36146e-07	159.267	1.50901	37.1715	0.00157482	463.233	8.10688	346.112	3.678e-38
	mmu-miR-882	12	110920416	+	GGAGAGAGTTAGCGCATTAG	AGGAGAGAGTTAGCGCATTAGT	mmu-miR-882	76.325	1.81524	2.29547	0.492415	85.1333	1.15978	5.04612	0.539395	78.0333	1.50424	1.51438	0.44681
	mmu-miR-883a-3p	X	64033965	-	CAACAGCTCTCAGTAT	TAACTGCAACAGCTCTCAGTAT	mmu-miR-883a-3p	88.425	1.90639	7.92102	0.182927	172.867	1.49989	120.032	0.00167313	300.667	8.74691	365.925	3.678e-38
	mmu-miR-883a-5p	X	64034000	-	TGCTGAGAGAAGTAGCAGTTAC	TGCTGAGAGAAGTAGCAGTTAC	mmu-miR-883a-5p	72.35	1.78254	1.03441	0.606055	83.1667	1.15527	12.3598	0.598997	71.0333	1.40401	1.05987	0.682419
	mmu-miR-883b-3p	X	64043097	-	TAACTGCAACATCTCT	TAACTGCAACATCTCTCAGTAT	mmu-miR-883b-3p	156.775	3.55668	113.952	2.70945e-10	173.633	1.75529	39.8278	0.000171713	94.9667	1.70428	1.11505	0.0514571
	mmu-miR-883b-5p	X	64043133	-	ACTGAGAATGGGTAGCAGTC	TACTGAGAATGGGTAGCAGTCA	mmu-miR-883b-5p	105.675	2.43262	4.5456	0.0104456	151.567	1.60065	27.6829	0.00346622	429.1	11.2938	558.072	3.678e-38
	mmu-miR-9	7,3,13	8.66502e+23	+,+,+	TCTTTGGTTATCTAGCTGTATG	TCTTTGGTTATCTAGCTGTATGA	mmu-miR-9	7190.8	101.402	594.372	3.678e-38	7551.73	101.474	1344.28	3.678e-38	5829.83	85.0955	782.394	3.678e-38
	mmu-miR-9*	3,7,13	8.80196e+23	+,+,+	TAAAGCTAGATAACCGAAAGT	ATAAAGCTAGATAACCGAAAGT	mmu-miR-9*	3368.28	56.7186	752.119	3.678e-38	932.5	18.2441	745.448	3.678e-38	2065.3	34.3144	660.364	3.678e-38
	mmu-miR-92a	14,X	1.15444e+16	+,-	TATTGCACTTGTCCCGGC	TATTGCACTTGTCCCGGCCTG	mmu-miR-92a	8304.08	120.793	1440.6	3.678e-38	13411.5	177.602	1631.54	3.678e-38	7493.93	113.604	1175.41	3.678e-38
	mmu-miR-92a*	X	50095091	-	GGGATTGGTGGCATTAC	AGGTGGGGATTGGTGGCATTAC	mmu-miR-92a*	251.625	4.84252	31.4023	3.678e-38	441.633	4.05791	204.637	3.678e-38	213.367	3.84232	2.77549	7.7805e-34
	mmu-miR-92b	3	89031070	-	CACTCGTCCCGGCCTC	TATTGCACTCGTCCCGGCCTCC	mmu-miR-92b	558.475	12.3084	216.155	3.678e-38	1092.43	18.1795	496.478	3.678e-38	725.033	13.4981	380.811	3.678e-38
	mmu-miR-93	5	138606825	-	AAGTGCTGTTCGTGCAG	CAAAGTGCTGTTCGTGCAGGTAG	mmu-miR-93	7092.3	98.5893	428.29	3.678e-38	7110.83	101.987	298.274	3.678e-38	6975.9	103.689	335.444	3.678e-38
	mmu-miR-93*	5	138606786	-	TGCTGAGCTAGCACTTCC	ACTGCTGAGCTAGCACTTCCCG	mmu-miR-93*	1057.85	19.8285	266.597	3.678e-38	1032.8	17.5867	277.404	3.678e-38	1077.03	18.084	278.497	3.678e-38
	mmu-miR-96	6	30119529	-	TGGCACTAGCACATTTTT	TTTGGCACTAGCACATTTTTGCT	mmu-miR-96	246.525	5.31	22.6652	3.678e-38	429.567	4.64026	101.75	3.678e-38	257.767	4.81854	27.6957	3.678e-38
	mmu-miR-98	X	148347771	+	TGAGGTAGTAAGTTGTATTGTT	TGAGGTAGTAAGTTGTATTGTT	mmu-miR-98	11360.9	150.427	1547.89	3.678e-38	16436.2	233.436	2075.44	3.678e-38	11608.3	147.166	1544.28	3.678e-38
	mmu-miR-99a	16	77599184	+	CCCGTAGATCCGATCTT	AACCCGTAGATCCGATCTTGTG	mmu-miR-99a	8831.08	119.072	1182.94	3.678e-38	6764.73	98.6361	726.133	3.678e-38	9185.87	118.486	879.211	3.678e-38
	mmu-miR-99b	17	17967157	+	CCGTAGAACCGACCTTGC	CACCCGTAGAACCGACCTTGCG	mmu-miR-99b	8924.8	121.63	339.624	3.678e-38	8594.07	113.801	501.592	3.678e-38	9052.83	124.736	802.731	3.678e-38
	mmu-miR-99b*	17	17967195	+	TCGTGTCTGTGGGTCCG	CAAGCTCGTGTCTGTGGGTCCG	mmu-miR-99b*	165.925	3.63021	65.0774	2.50521e-12	132.3	2.1085	64.9653	0.0026879	181.633	3.35405	94.0594	1.206e-18
	solexa-103-3961	0	0	+	TCCTCGTTAGTATAGTGG	TCCTCGTTAGTATAGTGG	solexa-103-3961	770.525	14.4619	364.777	3.678e-38	903.567	16.9891	739.869	3.678e-38	854.9	13.2057	335.051	3.678e-38
	solexa-110-3896	0	0	+	TGTGGCTGGACATCTGT	AGAATTGTGGCTGGACATCTGT	solexa-110-3896	214.35	4.67807	139.557	9.46598e-22	300.133	3.26759	111.184	8.14252e-22	186.1	2.87018	115.706	7.63044e-25
	solexa-1127-427	0	0	+	AGAATTCTCGCCTGCC	TAGAATTCTCGCCTGCCAC	solexa-1127-427	8540.8	118.232	309.22	3.678e-38	6291	89.7117	1073.12	3.678e-38	6994.37	102.16	470.89	3.678e-38
	solexa-1201-400	0	0	+	AGAGGCGCCTGGGAAC	GGTCAAGAGGCGCCTGGGAAC	solexa-1201-400	560.8	11.2134	148.473	3.678e-38	1224.5	18.928	1120.48	3.678e-38	677.7	10.3073	330.364	3.678e-38
	solexa-1278-371	0	0	+	GTAAAGGCTGGGCTTAGAC	GTAAAGGCTGGGCTTAGACGTGG	solexa-1278-371	848.025	16.7259	370.451	3.678e-38	885.5	15.7904	529.131	3.678e-38	546.6	9.20827	81.893	3.678e-38
	solexa-130-3526	0	0	+	CAAGAAGTAGTTTAATTAGA	CAAGAAGTAGTTTAATTAGA	solexa-130-3526	116.075	2.66624	43.0213	0.00032448	139.167	1.40354	110.364	0.017161	204.367	3.73414	93.3573	5.23698e-27
	solexa-1328-360	0	0	+	CTTCCCCCCCTTCTTC	ACGCCCTTCCCCCCCTTCTTCA	solexa-1328-360	7646.7	112.72	686.323	3.678e-38	9911.93	127.882	3540.09	3.678e-38	7234.3	107.194	687.935	3.678e-38
	solexa-1416-339_2	0	0	+	AGGTCACGTCTCTGCAGT	CAGGTCACGTCTCTGCAGTTAC	solexa-1416-339_2	172.225	4.3915	128.613	3.75984e-15	184.067	1.67761	88.8609	0.000130632	111.8	1.95839	2.78388	0.000929649
	solexa-173-2522	0	0	+	CGTGGCTTTCGATTGTTA	ACCGTGGCTTTCGATTGTTACT	solexa-173-2522	5438.6	84.6525	566.125	3.678e-38	3105.83	60.0378	2122.86	3.678e-38	5681.57	96.7579	313.26	3.678e-38
	solexa-1780-267	0	0	+	ATCACAGCAAGTCTGTGCT	GAACATCACAGCAAGTCTGTGCT	solexa-1780-267	909.175	19.794	594.789	3.678e-38	259.133	3.15296	71.6291	5.7256e-16	1018.3	22.1241	989.978	3.678e-38
	solexa-1837-257	0	0	+	TATGGAGGTCTCTGTCTGACT	TATGGAGGTCTCTGTCTGACTT	solexa-1837-257	2499.4	44.9306	261.827	3.678e-38	1322.83	22.7136	459.652	3.678e-38	2856.03	41.0867	411.707	3.678e-38
	solexa-200-2167	0	0	+	GTCAGGATGGCCGAGC	GTCAGGATGGCCGAGCGGTCTAAG	solexa-200-2167	382.425	8.45832	109.843	3.678e-38	604.4	9.93521	210.965	3.678e-38	377.567	6.6228	119.132	3.678e-38
	solexa-2011-236	0	0	+	TCAGCAAGTATACTGCCCTA	AATCAGCAAGTATACTGCCCTA	solexa-2011-236	1321.65	26.958	415.775	3.678e-38	827.4	17.8298	662.075	3.678e-38	964.967	17.5298	520.653	3.678e-38
	solexa-201-2163	0	0	+	ACCTTGGCTCTAGACTGCT	ACCTTGGCTCTAGACTGCTTACT	solexa-201-2163	1205.47	23.584	527.162	3.678e-38	1763.5	32.3116	1674.16	3.678e-38	1935.13	33.3458	627.717	3.678e-38
	solexa-2012-235	0	0	+	GCGAACACAGAATCCATAC	TGGCGAACACAGAATCCATACT	solexa-2012-235	69.1	1.75901	2.55212	0.707949	77.2	1.14846	8.4788	0.690227	76.9667	1.67839	11.2545	0.478176
	solexa-2054-231	0	0	+	GAGGTTGCCCTTTGTATATT	AGCGAGGTTGCCCTTTGTATATT	solexa-2054-231	206.125	4.272	59.1336	2.68231e-22	334.033	3.9662	133.946	1.68347e-23	209.467	3.86673	65.2865	2.16519e-31
	solexa-2307-205	0	0	+	TTGTACATGGTAGGCTTTCA	TTGTACATGGTAGGCTTTCATT	solexa-2307-205	224.9	4.2798	53.5388	1.07383e-29	126.067	1.31656	14.0834	0.0437311	148.833	2.40397	40.4704	3.79281e-10
	solexa-231-1844	0	0	+	ATCTCCATAGTGACCA	ATCTCCATAGTGACCA	solexa-231-1844	877.025	20.1444	742.193	3.678e-38	733.367	23.5716	909.665	3.678e-38	1036.63	18.9682	565.173	3.678e-38
	solexa-239-1823	0	0	+	CTAGCCCTAGCCCTACA	CTAGCCCTAGCCCTACA	solexa-239-1823	16043.2	216.323	869.427	3.678e-38	17586.4	235.445	1444.06	3.678e-38	15894.1	201.322	1765.6	3.678e-38
	solexa-2402-197	0	0	+	GCCCGCGTGTTTTTCG	AAGTTGCCCGCGTGTTTTTCG	solexa-2402-197	183.425	3.62102	64.4053	9.14742e-16	127.3	1.38432	28.2523	0.0568563	84.9333	1.6161	2.05507	0.230163
	solexa-2546-186	0	0	+	TGATGAGCTATGTTTACTGAGC	GACTTATGATGAGCTATGTTTACTGAGC	solexa-2546-186	87.025	1.90072	1.02103	0.191334	93.1	1.19312	5.29434	0.397183	86.5	1.62416	2.9	0.188724
	solexa-2564-185	0	0	+	ACCTGGCATACAATGTAGATT	ACCTGGCATACAATGTAGATTTCTGT	solexa-2564-185	863.7	17.3105	255.248	3.678e-38	816.167	11.9769	652.971	3.678e-38	1145.73	21.2297	40.7982	3.678e-38
	solexa-2572-184	0	0	+	GTCAAACGGAACCAAGTC	GCTGGTCAAACGGAACCAAGTC	solexa-2572-184	80.35	1.88804	1.64621	0.359335	107.367	1.25558	30.1122	0.245231	88.5333	1.64496	10.9988	0.132092
	solexa-27-9416	0	0	+	GGTCTAGTGGTTAGGATTCG	TCCCTGGTGGTCTAGTGGTTAGGATTCGGC	solexa-27-9416	5399.93	86.8574	2446.14	3.678e-38	3714.2	60.3912	2789.99	3.678e-38	4820.07	75.5943	1952.92	3.678e-38
	solexa-284-1594	0	0	+	CTCGTTGGTCTAGGGGTAT	GGCTCGTTGGTCTAGGGGTATGATTC	solexa-284-1594	4976.95	81.3406	902.64	3.678e-38	6912.17	89.3158	1826.31	3.678e-38	4262.27	65.0224	502.548	3.678e-38
	solexa-3014-156	0	0	+	CTATACGGCCTCCTAG	CTATACGGCCTCCTAGCTTTC	solexa-3014-156	69.5	1.67215	0.424264	0.691544	73.2	1.04912	2.65142	0.731887	67.7333	1.41375	0.64291	0.778452
	solexa-3024-155	0	0	+	TTTCAGTGGAGTGAAGCTC	GATTTCAGTGGAGTGAAGCTCA	solexa-3024-155	164.475	3.30626	21.2035	7.10822e-12	206.5	2.10011	34.2387	9.0676e-08	147.767	2.72725	8.64889	2.07282e-10
	solexa-3062-153	0	0	+	GGATATGATGACTGATTACCTG	TGGATATGATGACTGATTACCTGAGA	solexa-3062-153	2076.25	38.7913	180.539	3.678e-38	2291.6	43.4387	821.349	3.678e-38	2089.3	36.4702	357.343	3.678e-38
	solexa-308-1456	0	0	+	CCCGGCTAGCTCAGTC	GCCCGGCTAGCTCAGTCGGTAGA	solexa-308-1456	2370.68	42.322	497.938	3.678e-38	821.3	11.6051	117.425	3.678e-38	1929.23	29.2506	463.002	3.678e-38
	solexa-3253-144	0	0	+	GGCTGGAGAGATGGCT	GGGCTGGAGAGATGGCTCAGCCGTT	solexa-3253-144	4132.73	66.3568	1207.41	3.678e-38	6924.17	92.4477	2067.58	3.678e-38	3638.77	58.0735	1094.29	3.678e-38
	solexa-403-1161	0	0	+	CTACGGCCATACCACC	GTCTACGGCCATACCACCCTGA	solexa-403-1161	3175.4	52.1612	140.523	3.678e-38	3549.3	45.4866	1009.07	3.678e-38	2312.83	36.91	650.397	3.678e-38
	solexa-4153-111	0	0	+	GACCTCGTGGCGCAAT	GACCTCGTGGCGCAATGG	solexa-4153-111	510.65	10.1033	154.143	3.678e-38	969.033	23.5759	1233.87	3.678e-38	345.233	5.73648	129.604	3.678e-38
	solexa-4179-110	0	0	+	CACTGAACAATGAATGCAA	CTCACTGAACAATGAATGCAA	solexa-4179-110	1260.9	24.9352	366.752	3.678e-38	1028.6	20.6637	899.889	3.678e-38	1389.83	27.7733	751.943	3.678e-38
	solexa-4327-106	0	0	+	CAAATCTTATTTGAGCACCTG	CAAATCTTATTTGAGCACCTGT	solexa-4327-106	94.975	2.70856	58.8858	0.0229547	67	1.04662	3.31512	0.810974	542.533	11.5998	420.696	3.678e-38
	solexa-447-1003	0	0	+	GCCGAGTGGTCTAAGG	GTCAGGATGGCCGAGTGGTCTAAGG	solexa-447-1003	1436.22	24.1063	351.016	3.678e-38	1678.57	25.1719	205.415	3.678e-38	1642.57	23.4131	203.503	3.678e-38
	solexa-4983-92	0	0	+	ATACAAGGATAATTTCTTTT	CATACAAGGATAATTTCTTTTT	solexa-4983-92	571.775	12.4074	543.466	3.678e-38	3173.9	43.5936	1408.11	3.678e-38	371.267	7.48559	449.842	3.678e-38
	solexa-5067-90	0	0	+	GAAGTTCTGTTATACACTCAGG	GAAGTTCTGTTATACACTCAGG	solexa-5067-90	272.325	6.08518	167.15	3.678e-38	420.233	7.18222	446.871	3.678e-38	362.167	6.488	30.3121	3.678e-38
	solexa-5306-86	0	0	+	ACCCGTCCCGTTCGTC	ACCCGTCCCGTTCGTCCCCGGA	solexa-5306-86	198.6	4.24576	104.325	6.87098e-19	804.367	12.6976	210.119	3.678e-38	355	7.54256	245.712	3.678e-38
	solexa-5560-82	0	0	+	AATTCGTGAAGCGTTCC	AATTCGTGAAGCGTTCC	solexa-5560-82	10206.9	129.738	553.099	3.678e-38	5938.87	85.3827	1739.94	3.678e-38	10067.5	133.064	1848.75	3.678e-38
	solexa-5593-81	0	0	+	GAAGGCAAAGGGACGT	GCTGGGAAGGCAAAGGGACGT	solexa-5593-81	182.1	4.1792	36.7202	6.38932e-16	697.133	12.4132	422.742	3.678e-38	580.867	10.1413	167.871	3.678e-38
	solexa-564-789	0	0	+	AGGTTTTCTGGGTCTCTG	AGAGGTTTTCTGGGTCTCTGTTTC	solexa-564-789	219.025	4.68069	99.4778	1.19596e-29	400.167	7.34135	235.787	3.678e-38	308.767	4.67422	148.653	3.678e-38
	solexa-622-718	0	0	+	GGGGATGTAGCTCAGTGGT	GGGGATGTAGCTCAGTGGTAGA	solexa-622-718	3925.53	61.2835	1054.67	3.678e-38	5491.07	76.7044	2167.4	3.678e-38	2574.53	40.6136	1405.2	3.678e-38
	solexa-783-586	0	0	+	GTGCAGTGCTGCATCTC	GGTGCAGTGCTGCATCTCTGG	solexa-783-586	291.25	6.19282	61.405	3.678e-38	146.933	3.37484	127.005	1.67029e-05	241.333	4.17603	53.1489	3.678e-38
	solexa-897-515	0	0	+	TGGAGTTCATGCAAGTTCT	TTGGAGTTCATGCAAGTTCT	solexa-897-515	6152.7	92.3584	284.243	3.678e-38	5143.1	73.983	850.995	3.678e-38	6279.7	96.4388	646.672	3.678e-38

## Sheet: SampleTable
	# of Errors	0
Index	Sample ID	Sample Group	Sentrix Barcode	Sample Section	Detected Genes (0.01)	Detected Genes (0.05)	Signal Average	Signal P05	Signal P25	Signal P50	Signal P75	Signal P95	Sample_Well	Sample_Plate	Pool_ID	ARRAY HYB CONTROL	EXTENSION MISMATCH CONTROL	INTERNAL SINGLE MISMATCH CONTROL	NEGATIVE (background)	PAP CONTROL	PCR CONTAMINATION	QUERY OLIGO ANNEALING CONTROL	Noise
Index	Sample ID	Sample Group	Sentrix Barcode	Sample Section	Detected Genes (0.01)	Detected Genes (0.05)	Signal Average	Signal P05	Signal P25	Signal P50	Signal P75	Signal P95	Sample_Well	Sample_Plate	Pool_ID	ARRAY HYB CONTROL	EXTENSION MISMATCH CONTROL	INTERNAL SINGLE MISMATCH CONTROL	NEGATIVE (background)	PAP CONTROL	PCR CONTAMINATION	QUERY OLIGO ANNEALING CONTROL	Noise
1	wt1	wt	4344812033	I	512	527	3451.42	67.0833	117.583	561.083	3772.5	19473				6081.25	890	7899.73	86.0588	12905.2	6771.5	1710	15.7499
2	wt2	wt	4344812033	J	517	533	3450.71	67.75	117.583	561.083	3772.5	19473				5921.75	844.5	7540	82.8824	12685.9	7008.5	1445	14.4087
3	wt3	wt	4344812033	K	528	545	3451.13	67.75	116.75	561.083	3772.5	19473				5873.5	672.25	7880.09	80.8824	12687.2	6686.5	1261.33	35.7419
4	wt4	wt	4344812033	L	490	507	3449.93	66.6667	116.75	561.083	3772.5	19473				5657.5	744.25	7462.27	86.1176	12107	7893.5	929	35.1424
5	337	cs2	4344812033	A	445	461	3450.22	66.6667	112.917	554.333	3715.58	19473				6371.5	835	7805.45	113.823	13659.4	10096.5	174	130.42
6	338	cs2	4344812033	B	397	414	3444.53	66.6667	112.5	557.25	3663.25	19473				6972.25	1192.75	8300.09	247.765	16974	4052	69.6667	753.721
7	343	cs2	4344812033	C	459	475	3450.39	66.6667	112.5	554.333	3715.58	19473				6696.25	661.75	8408.27	119.294	14660.1	9749.5	543.667	141.895
8	346	cs2	4344812033	D	496	514	3451.92	67.0833	116.083	561.083	3715.58	19473				6658.25	708.25	8779	90.5294	13775.2	9011	333.667	49.6111
9	437	mlp	4344812033	E	521	536	3451.02	67.0833	116.083	561.083	3772.5	19473				6349.75	646.25	7910.09	87.8824	12336.8	7048	673.333	38.728
10	438	mlp	4344812033	F	531	548	3445.74	66.6667	112.917	561.083	3715.58	19473				6248	991.75	9904.45	299.294	12196.8	3477.5	80	571.505
11	448	mlp	4344812033	G	510	525	3451.36	67.0833	117.583	561.083	3772.5	19473				6279.75	994.75	7906.64	86.0588	12946.4	8629	1582.67	14.1619
12	449	mlp	4344812033	H	521	536	3452.2	67.5	116.083	561.083	3715.58	19473				6206.75	996	7788.09	92.8824	12585	7066.5	2673.67	26.6901

## Sheet: Ctrl_Probe_Profile
					1	2	3	4	5	6	7	8	9	10	11	12	13	14	15	16	17	18	19	20	21	22	23	24	194	195	196	197	198	199	200	201	202	203	204	205	206	207	208	209	210	211	212	213	214
0	# of Errors				AVG_Signal	Detection Pval	AVG_Signal	Detection Pval	AVG_Signal	Detection Pval	AVG_Signal	Detection Pval	AVG_Signal	Detection Pval	AVG_Signal	Detection Pval	AVG_Signal	Detection Pval	AVG_Signal	Detection Pval	AVG_Signal	Detection Pval	AVG_Signal	Detection Pval	AVG_Signal	Detection Pval	AVG_Signal	Detection Pval
			TargetID	ProbeID	AVG_Signal	Detection Pval	AVG_Signal	Detection Pval	AVG_Signal	Detection Pval	AVG_Signal	Detection Pval	AVG_Signal	Detection Pval	AVG_Signal	Detection Pval	AVG_Signal	Detection Pval	AVG_Signal	Detection Pval	AVG_Signal	Detection Pval	AVG_Signal	Detection Pval	AVG_Signal	Detection Pval	AVG_Signal	Detection Pval
	TargetID	ProbeID	TargetID	ProbeID	wt1.AVG_Signal	wt1.Detection Pval	wt2.AVG_Signal	wt2.Detection Pval	wt3.AVG_Signal	wt3.Detection Pval	wt4.AVG_Signal	wt4.Detection Pval	337.AVG_Signal	337.Detection Pval	338.AVG_Signal	338.Detection Pval	343.AVG_Signal	343.Detection Pval	346.AVG_Signal	346.Detection Pval	437.AVG_Signal	437.Detection Pval	438.AVG_Signal	438.Detection Pval	448.AVG_Signal	448.Detection Pval	449.AVG_Signal	449.Detection Pval
	ARRAY HYB CONTROL	1003	ARRAY HYB CONTROL	1003	7576	3.678e-38	7479	3.678e-38	7521	3.678e-38	7235	3.678e-38	7504	3.678e-38	8263	3.678e-38	8108	3.678e-38	7955	3.678e-38	7672	3.678e-38	7699	3.678e-38	7748	3.678e-38	7572	3.678e-38
	ARRAY HYB CONTROL	278	ARRAY HYB CONTROL	278	6969	3.678e-38	6663	3.678e-38	6620	3.678e-38	6279	3.678e-38	7392	3.678e-38	8106	3.678e-38	7719	3.678e-38	7666	3.678e-38	7352	3.678e-38	6965	3.678e-38	7185	3.678e-38	7156	3.678e-38
	ARRAY HYB CONTROL	44	ARRAY HYB CONTROL	44	4082	3.678e-38	3992	3.678e-38	3895	3.678e-38	3800	3.678e-38	4819	3.678e-38	5146	3.678e-38	4827	3.678e-38	5051	3.678e-38	4705	3.678e-38	4586	3.678e-38	4439	3.678e-38	4410	3.678e-38
	ARRAY HYB CONTROL	501	ARRAY HYB CONTROL	501	5698	3.678e-38	5553	3.678e-38	5458	3.678e-38	5316	3.678e-38	5771	3.678e-38	6374	3.678e-38	6131	3.678e-38	5961	3.678e-38	5670	3.678e-38	5742	3.678e-38	5747	3.678e-38	5689	3.678e-38
	EXTENSION MISMATCH CONTROL	1864	EXTENSION MISMATCH CONTROL	1864	74	0.778056	95	0.200175	98	0.011962	68	0.768608	62	0.703039	55	0.732063	62	0.715927	71	0.598293	67	0.765787	145	2.38284e-09	343	3.678e-38	122	0.00117714
	EXTENSION MISMATCH CONTROL	1866	EXTENSION MISMATCH CONTROL	1866	85	0.5268	153	5.69192e-07	63	0.804171	330	3.678e-38	51	0.900613	50	0.823451	55	0.865614	58	0.867734	59	0.924811	67	0.740179	69	0.885813	187	5.29355e-17
	EXTENSION MISMATCH CONTROL	1902	EXTENSION MISMATCH CONTROL	1902	391	3.678e-38	208	1.94449e-18	166	4.8296e-17	104	0.0325459	100	0.019495	48	0.853694	220	6.22349e-31	175	1.1564e-11	182	8.26956e-22	484	3.678e-38	241	3.77219e-28	352	3.678e-38
	EXTENSION MISMATCH CONTROL	1992	EXTENSION MISMATCH CONTROL	1992	3010	3.678e-38	2922	3.678e-38	2362	3.678e-38	2475	3.678e-38	3127	3.678e-38	4618	3.678e-38	2310	3.678e-38	2529	3.678e-38	2277	3.678e-38	3271	3.678e-38	3326	3.678e-38	3323	3.678e-38
	INTERNAL SINGLE MISMATCH CONTROL	1070	INTERNAL SINGLE MISMATCH CONTROL	1070	167	1.38234e-07	161	2.9608e-08	169	4.91981e-18	145	8.70188e-07	917	3.678e-38	277	3.678e-38	172	2.30932e-15	1563	3.678e-38	161	9.78701e-15	10254	3.678e-38	173	4.16587e-10	172	6.94848e-13
	INTERNAL SINGLE MISMATCH CONTROL	1716	INTERNAL SINGLE MISMATCH CONTROL	1716	86	0.50149	80	0.579276	106	0.00148744	78	0.507144	70	0.494546	67	0.450732	70	0.483739	681	3.678e-38	77	0.43392	6234	3.678e-38	86	0.501657	87	0.416711
	INTERNAL SINGLE MISMATCH CONTROL	3001	INTERNAL SINGLE MISMATCH CONTROL	3001	23293	3.678e-38	22010	3.678e-38	22777	3.678e-38	22498	3.678e-38	24287	3.678e-38	26969	3.678e-38	26373	3.678e-38	25515	3.678e-38	23446	3.678e-38	24744	3.678e-38	22914	3.678e-38	22440	3.678e-38
	INTERNAL SINGLE MISMATCH CONTROL	3007	INTERNAL SINGLE MISMATCH CONTROL	3007	21344	3.678e-38	20755	3.678e-38	21430	3.678e-38	20752	3.678e-38	23088	3.678e-38	25270	3.678e-38	25139	3.678e-38	23880	3.678e-38	22397	3.678e-38	23672	3.678e-38	21559	3.678e-38	21199	3.678e-38
	INTERNAL SINGLE MISMATCH CONTROL	3022	INTERNAL SINGLE MISMATCH CONTROL	3022	24453	3.678e-38	23885	3.678e-38	24509	3.678e-38	24023	3.678e-38	24940	3.678e-38	27596	3.678e-38	27912	3.678e-38	26478	3.678e-38	24825	3.678e-38	24369	3.678e-38	24499	3.678e-38	24132	3.678e-38
	INTERNAL SINGLE MISMATCH CONTROL	3183	INTERNAL SINGLE MISMATCH CONTROL	3183	16891	3.678e-38	15316	3.678e-38	15613	3.678e-38	13998	3.678e-38	11406	3.678e-38	10641	3.678e-38	12316	3.678e-38	15461	3.678e-38	15264	3.678e-38	4955	3.678e-38	17091	3.678e-38	16750	3.678e-38
	INTERNAL SINGLE MISMATCH CONTROL	3290	INTERNAL SINGLE MISMATCH CONTROL	3290	106	0.102736	200	2.20086e-16	192	1.17602e-26	96	0.101769	81	0.221968	83	0.132572	81	0.188981	89	0.170733	264	3.678e-38	203	5.88231e-27	103	0.115799	117	0.00418179
	INTERNAL SINGLE MISMATCH CONTROL	4999	INTERNAL SINGLE MISMATCH CONTROL	4999	72	0.813972	66	0.879337	596	3.678e-38	60	0.904454	51	0.900613	49	0.839036	53	0.895945	64	0.762905	69	0.707726	2297	3.678e-38	68	0.898876	71	0.860803
	INTERNAL SINGLE MISMATCH CONTROL	526	INTERNAL SINGLE MISMATCH CONTROL	526	157	3.33371e-06	157	1.34751e-07	141	5.83591e-10	138	9.34069e-06	163	9.45769e-11	145	3.66868e-07	158	6.57241e-12	271	3.678e-38	152	3.65721e-12	137	1.05875e-07	173	4.16587e-10	163	1.02664e-10
	INTERNAL SINGLE MISMATCH CONTROL	590	INTERNAL SINGLE MISMATCH CONTROL	590	106	0.102736	84	0.469086	79	0.285232	81	0.421914	74	0.387023	75	0.267937	74	0.364466	74	0.519499	75	0.504742	147	8.62655e-10	84	0.557794	89	0.354911
	INTERNAL SINGLE MISMATCH CONTROL	662	INTERNAL SINGLE MISMATCH CONTROL	662	222	3.07368e-18	226	1.52869e-23	1069	3.678e-38	216	2.92354e-23	783	3.678e-38	129	3.71776e-05	143	9.50753e-09	2493	3.678e-38	281	3.678e-38	11937	3.678e-38	223	2.06431e-22	449	3.678e-38
	NEGATIVE	1142	NEGATIVE	1142	95	0.28512	92	0.263436	82	0.202038	88	0.242448	81	0.221968	87	0.0866085	82	0.169006	85	0.246811	156	2.84254e-13	95	0.0455822	90	0.390393	89	0.354911
	NEGATIVE	1237	NEGATIVE	1237	126	0.00560689	86	0.414349	81	0.228025	99	0.0685806	87	0.11986	73	0.310211	85	0.117528	76	0.466346	79	0.365163	82	0.27225	89	0.417738	84	0.512906
	NEGATIVE	1306	NEGATIVE	1306	79	0.672989	78	0.632638	70	0.592361	74	0.619609	64	0.654115	62	0.573667	64	0.661988	162	2.97358e-09	69	0.707726	70	0.653178	81	0.639534	81	0.608352
	NEGATIVE	1365	NEGATIVE	1365	78	0.695561	73	0.7536	68	0.659691	70	0.722739	63	0.678965	60	0.621541	63	0.689467	68	0.673272	69	0.707726	68	0.712455	79	0.690912	87	0.416711
	NEGATIVE	1573	NEGATIVE	1573	60	0.950991	58	0.957907	54	0.951301	55	0.952097	49	0.922453	47	0.867428	51	0.920976	59	0.852926	54	0.970212	56	0.94068	62	0.955326	60	0.975794
	NEGATIVE	1578	NEGATIVE	1578	97	0.243627	75	0.70783	213	4.20327e-36	106	0.0234114	339	3.678e-38	3172	3.678e-38	453	3.678e-38	58	0.867734	211	4.72105e-34	292	3.678e-38	105	0.0905337	163	1.02664e-10
	NEGATIVE	1692	NEGATIVE	1692	71	0.830495	72	0.774955	64	0.778642	69	0.746217	61	0.726252	59	0.644844	63	0.689467	66	0.719825	65	0.816825	66	0.766456	76	0.761233	76	0.751583
	NEGATIVE	1742	NEGATIVE	1742	89	0.425931	85	0.441578	79	0.285232	77	0.535676	96	0.0366566	106	0.00557187	87	0.0900703	110	0.00934869	85	0.189549	2445	3.678e-38	92	0.337419	91	0.296713
	NEGATIVE	2109	NEGATIVE	2109	101	0.171399	99	0.131654	90	0.0610095	91	0.180527	86	0.134075	77	0.228778	82	0.169006	90	0.154351	86	0.166347	83	0.245301	101	0.145706	105	0.0478223
	NEGATIVE	2165	NEGATIVE	2165	89	0.425931	112	0.0216481	63	0.804171	212	4.87518e-22	549	3.678e-38	48	0.853694	533	3.678e-38	256	6.42079e-34	80	0.332204	478	3.678e-38	112	0.0334935	150	5.6017e-08
	NEGATIVE	3137	NEGATIVE	3137	91	0.376864	92	0.263436	75	0.416298	80	0.450118	67	0.57589	59	0.644844	66	0.604498	74	0.519499	85	0.189549	456	3.678e-38	87	0.473506	94	0.218712
	NEGATIVE	329	NEGATIVE	329	98	0.224173	103	0.0813247	89	0.0725091	86	0.289386	85	0.149407	74	0.28871	81	0.188981	91	0.139043	89	0.108204	82	0.27225	104	0.102602	102	0.0772706
	NEGATIVE	3511	NEGATIVE	3511	64	0.919329	64	0.904984	56	0.930511	60	0.904454	50	0.912038	46	0.880247	49	0.941157	59	0.852926	58	0.936662	58	0.918319	65	0.931494	68	0.90768
	NEGATIVE	3885	NEGATIVE	3885	80	0.649766	81	0.55197	75	0.416298	74	0.619609	69	0.521805	67	0.450732	68	0.544635	71	0.598293	75	0.504742	80	0.330198	82	0.612791	86	0.448511
	NEGATIVE	4254	NEGATIVE	4254	92	0.353005	93	0.24128	85	0.13537	87	0.26539	76	0.335858	71	0.355156	85	0.117528	86	0.226255	84	0.214643	82	0.27225	90	0.390393	94	0.218712
	NEGATIVE	4824	NEGATIVE	4824	78	0.695561	78	0.632638	70	0.592361	73	0.646575	59	0.769811	53	0.771222	60	0.765367	68	0.673272	64	0.839517	365	3.678e-38	79	0.690912	76	0.751583
	NEGATIVE	975	NEGATIVE	975	75	0.758708	68	0.849168	61	0.849575	63	0.862682	54	0.859927	51	0.806944	56	0.848366	60	0.837046	85	0.189549	230	3.678e-38	69	0.885813	73	0.821775
	PAP CONTROL	1038	PAP CONTROL	1038	23089	3.678e-38	22858	3.678e-38	22291	3.678e-38	22472	3.678e-38	25146	3.678e-38	30288	3.678e-38	27170	3.678e-38	24772	3.678e-38	23087	3.678e-38	24638	3.678e-38	23114	3.678e-38	22665	3.678e-38
	PAP CONTROL	127	PAP CONTROL	127	3617	3.678e-38	4293	3.678e-38	3414	3.678e-38	4015	3.678e-38	8453	3.678e-38	16947	3.678e-38	10622	3.678e-38	5958	3.678e-38	3646	3.678e-38	8424	3.678e-38	3523	3.678e-38	3273	3.678e-38
	PAP CONTROL	1299	PAP CONTROL	1299	20621	3.678e-38	21083	3.678e-38	20430	3.678e-38	20096	3.678e-38	23034	3.678e-38	28456	3.678e-38	24493	3.678e-38	22800	3.678e-38	20898	3.678e-38	23434	3.678e-38	20952	3.678e-38	19933	3.678e-38
	PAP CONTROL	134	PAP CONTROL	134	1127	3.678e-38	1254	3.678e-38	1755	3.678e-38	1580	3.678e-38	6652	3.678e-38	16731	3.678e-38	6828	3.678e-38	3632	3.678e-38	1871	3.678e-38	8023	3.678e-38	2126	3.678e-38	2791	3.678e-38
	PAP CONTROL	3183	PAP CONTROL	3183	16891	3.678e-38	15316	3.678e-38	15613	3.678e-38	13998	3.678e-38	11406	3.678e-38	10641	3.678e-38	12316	3.678e-38	15461	3.678e-38	15264	3.678e-38	4955	3.678e-38	17091	3.678e-38	16750	3.678e-38
	PAP CONTROL	3299	PAP CONTROL	3299	2964	3.678e-38	2673	3.678e-38	2900	3.678e-38	2271	3.678e-38	75	0.36113	69	0.402212	88	0.0782756	1287	3.678e-38	1680	3.678e-38	127	6.63463e-06	2856	3.678e-38	2301	3.678e-38
	PAP CONTROL	3324	PAP CONTROL	3324	4970	3.678e-38	4602	3.678e-38	5302	3.678e-38	3325	3.678e-38	4464	3.678e-38	733	3.678e-38	2214	3.678e-38	3311	3.678e-38	2816	3.678e-38	2332	3.678e-38	4862	3.678e-38	4877	3.678e-38
	PAP CONTROL	3500	PAP CONTROL	3500	25882	3.678e-38	25021	3.678e-38	25315	3.678e-38	24476	3.678e-38	23708	3.678e-38	22940	3.678e-38	25725	3.678e-38	26079	3.678e-38	25706	3.678e-38	18159	3.678e-38	25461	3.678e-38	25292	3.678e-38
	PAP CONTROL	898	PAP CONTROL	898	16986	3.678e-38	17073	3.678e-38	17165	3.678e-38	16730	3.678e-38	19997	3.678e-38	25961	3.678e-38	22485	3.678e-38	20677	3.678e-38	16063	3.678e-38	19679	3.678e-38	16533	3.678e-38	15383	3.678e-38
	PCR CONTAMINATION	2011	PCR CONTAMINATION	2011	79	0.672989	84	0.469086	73	0.486688	73	0.646575	60	0.74853	54	0.752055	59	0.788178	68	0.673272	69	0.707726	117	0.000213787	81	0.639534	85	0.480645
	PCR CONTAMINATION	910	PCR CONTAMINATION	910	13464	3.678e-38	13933	3.678e-38	13300	3.678e-38	15714	3.678e-38	20133	3.678e-38	8050	3.678e-38	19440	3.678e-38	17954	3.678e-38	14027	3.678e-38	6838	3.678e-38	17177	3.678e-38	14048	3.678e-38
	QUERY OLIGO ANNEALING CONTROL	1209	QUERY OLIGO ANNEALING CONTROL	1209	242	2.09818e-23	389	3.678e-38	679	3.678e-38	53	0.96476	47	0.940439	45	0.892165	48	0.949602	52	0.935217	101	0.010559	58	0.918319	76	0.761233	555	3.678e-38
	QUERY OLIGO ANNEALING CONTROL	912	QUERY OLIGO ANNEALING CONTROL	912	4790	3.678e-38	3868	3.678e-38	3040	3.678e-38	2621	3.678e-38	198	9.63648e-19	72	0.332382	1513	3.678e-38	878	3.678e-38	1837	3.678e-38	103	0.00923863	4598	3.678e-38	7386	3.678e-38
	QUERY OLIGO ANNEALING CONTROL	962	QUERY OLIGO ANNEALING CONTROL	962	98	0.224173	78	0.632638	65	0.751309	113	0.00639885	277	3.678e-38	92	0.0473143	70	0.483739	71	0.598293	82	0.270228	79	0.360906	74	0.802754	80	0.639049
		ARRAY HYB CONTROL	ARRAY HYB CONTROL	ARRAY HYB CONTROL	ARRAY HYB CONTROL	EXTENSION MISMATCH CONTROL	EXTENSION MISMATCH CONTROL	EXTENSION MISMATCH CONTROL	EXTENSION MISMATCH CONTROL	INTERNAL SINGLE MISMATCH CONTROL	INTERNAL SINGLE MISMATCH CONTROL	INTERNAL SINGLE MISMATCH CONTROL	INTERNAL SINGLE MISMATCH CONTROL	INTERNAL SINGLE MISMATCH CONTROL	INTERNAL SINGLE MISMATCH CONTROL	INTERNAL SINGLE MISMATCH CONTROL	INTERNAL SINGLE MISMATCH CONTROL	INTERNAL SINGLE MISMATCH CONTROL	INTERNAL SINGLE MISMATCH CONTROL	INTERNAL SINGLE MISMATCH CONTROL	NEGATIVE	NEGATIVE	NEGATIVE	NEGATIVE	NEGATIVE	NEGATIVE	NEGATIVE	NEGATIVE	NEGATIVE	NEGATIVE	NEGATIVE	NEGATIVE	NEGATIVE	NEGATIVE	NEGATIVE	NEGATIVE	NEGATIVE	PAP CONTROL	PAP CONTROL	PAP CONTROL	PAP CONTROL	PAP CONTROL	PAP CONTROL	PAP CONTROL	PAP CONTROL	PAP CONTROL	PCR CONTAMINATION	PCR CONTAMINATION	QUERY OLIGO ANNEALING CONTROL
	TargetID	ARRAY HYB CONTROL	ARRAY HYB CONTROL	ARRAY HYB CONTROL	ARRAY HYB CONTROL	EXTENSION MISMATCH CONTROL	EXTENSION MISMATCH CONTROL	EXTENSION MISMATCH CONTROL	EXTENSION MISMATCH CONTROL	INTERNAL SINGLE MISMATCH CONTROL	INTERNAL SINGLE MISMATCH CONTROL	INTERNAL SINGLE MISMATCH CONTROL	INTERNAL SINGLE MISMATCH CONTROL	INTERNAL SINGLE MISMATCH CONTROL	INTERNAL SINGLE MISMATCH CONTROL	INTERNAL SINGLE MISMATCH CONTROL	INTERNAL SINGLE MISMATCH CONTROL	INTERNAL SINGLE MISMATCH CONTROL	INTERNAL SINGLE MISMATCH CONTROL	INTERNAL SINGLE MISMATCH CONTROL	NEGATIVE	NEGATIVE	NEGATIVE	NEGATIVE	NEGATIVE	NEGATIVE	NEGATIVE	NEGATIVE	NEGATIVE	NEGATIVE	NEGATIVE	NEGATIVE	NEGATIVE	NEGATIVE	NEGATIVE	NEGATIVE	NEGATIVE	PAP CONTROL	PAP CONTROL	PAP CONTROL	PAP CONTROL	PAP CONTROL	PAP CONTROL	PAP CONTROL	PAP CONTROL	PAP CONTROL	PCR CONTAMINATION	PCR CONTAMINATION	QUERY OLIGO ANNEALING CONTROL
	ProbeID	1003	278	44	501	1864	1866	1902	1992	1070	1716	3001	3007	3022	3183	3290	4999	526	590	662	1142	1237	1306	1365	1573	1578	1692	1742	2109	2165	3137	329	3511	3885	4254	4824	975	1038	127	1299	134	3183	3299	3324	3500	898	2011	910	1209
1	wt1.AVG_Signal	7576	6969	4082	5698	74	85	391	3010	167	86	23293	21344	24453	16891	106	72	157	106	222	95	126	79	78	60	97	71	89	101	89	91	98	64	80	92	78	75	23089	3617	20621	1127	16891	2964	4970	25882	16986	79	13464	242
2	wt1.Detection Pval	3.678e-38	3.678e-38	3.678e-38	3.678e-38	0.778056	0.5268	3.678e-38	3.678e-38	1.38234e-07	0.50149	3.678e-38	3.678e-38	3.678e-38	3.678e-38	0.102736	0.813972	3.33371e-06	0.102736	3.07368e-18	0.28512	0.00560689	0.672989	0.695561	0.950991	0.243627	0.830495	0.425931	0.171399	0.425931	0.376864	0.224173	0.919329	0.649766	0.353005	0.695561	0.758708	3.678e-38	3.678e-38	3.678e-38	3.678e-38	3.678e-38	3.678e-38	3.678e-38	3.678e-38	3.678e-38	0.672989	3.678e-38	2.09818e-23
3	wt2.AVG_Signal	7479	6663	3992	5553	95	153	208	2922	161	80	22010	20755	23885	15316	200	66	157	84	226	92	86	78	73	58	75	72	85	99	112	92	103	64	81	93	78	68	22858	4293	21083	1254	15316	2673	4602	25021	17073	84	13933	389
4	wt2.Detection Pval	3.678e-38	3.678e-38	3.678e-38	3.678e-38	0.200175	5.69192e-07	1.94449e-18	3.678e-38	2.9608e-08	0.579276	3.678e-38	3.678e-38	3.678e-38	3.678e-38	2.20086e-16	0.879337	1.34751e-07	0.469086	1.52869e-23	0.263436	0.414349	0.632638	0.7536	0.957907	0.70783	0.774955	0.441578	0.131654	0.0216481	0.263436	0.0813247	0.904984	0.55197	0.24128	0.632638	0.849168	3.678e-38	3.678e-38	3.678e-38	3.678e-38	3.678e-38	3.678e-38	3.678e-38	3.678e-38	3.678e-38	0.469086	3.678e-38	3.678e-38
5	wt3.AVG_Signal	7521	6620	3895	5458	98	63	166	2362	169	106	22777	21430	24509	15613	192	596	141	79	1069	82	81	70	68	54	213	64	79	90	63	75	89	56	75	85	70	61	22291	3414	20430	1755	15613	2900	5302	25315	17165	73	13300	679
6	wt3.Detection Pval	3.678e-38	3.678e-38	3.678e-38	3.678e-38	0.011962	0.804171	4.8296e-17	3.678e-38	4.91981e-18	0.00148744	3.678e-38	3.678e-38	3.678e-38	3.678e-38	1.17602e-26	3.678e-38	5.83591e-10	0.285232	3.678e-38	0.202038	0.228025	0.592361	0.659691	0.951301	4.20327e-36	0.778642	0.285232	0.0610095	0.804171	0.416298	0.0725091	0.930511	0.416298	0.13537	0.592361	0.849575	3.678e-38	3.678e-38	3.678e-38	3.678e-38	3.678e-38	3.678e-38	3.678e-38	3.678e-38	3.678e-38	0.486688	3.678e-38	3.678e-38
7	wt4.AVG_Signal	7235	6279	3800	5316	68	330	104	2475	145	78	22498	20752	24023	13998	96	60	138	81	216	88	99	74	70	55	106	69	77	91	212	80	86	60	74	87	73	63	22472	4015	20096	1580	13998	2271	3325	24476	16730	73	15714	53
8	wt4.Detection Pval	3.678e-38	3.678e-38	3.678e-38	3.678e-38	0.768608	3.678e-38	0.0325459	3.678e-38	8.70188e-07	0.507144	3.678e-38	3.678e-38	3.678e-38	3.678e-38	0.101769	0.904454	9.34069e-06	0.421914	2.92354e-23	0.242448	0.0685806	0.619609	0.722739	0.952097	0.0234114	0.746217	0.535676	0.180527	4.87518e-22	0.450118	0.289386	0.904454	0.619609	0.26539	0.646575	0.862682	3.678e-38	3.678e-38	3.678e-38	3.678e-38	3.678e-38	3.678e-38	3.678e-38	3.678e-38	3.678e-38	0.646575	3.678e-38	0.96476
9	337.AVG_Signal	7504	7392	4819	5771	62	51	100	3127	917	70	24287	23088	24940	11406	81	51	163	74	783	81	87	64	63	49	339	61	96	86	549	67	85	50	69	76	59	54	25146	8453	23034	6652	11406	75	4464	23708	19997	60	20133	47
10	337.Detection Pval	3.678e-38	3.678e-38	3.678e-38	3.678e-38	0.703039	0.900613	0.019495	3.678e-38	3.678e-38	0.494546	3.678e-38	3.678e-38	3.678e-38	3.678e-38	0.221968	0.900613	9.45769e-11	0.387023	3.678e-38	0.221968	0.11986	0.654115	0.678965	0.922453	3.678e-38	0.726252	0.0366566	0.134075	3.678e-38	0.57589	0.149407	0.912038	0.521805	0.335858	0.769811	0.859927	3.678e-38	3.678e-38	3.678e-38	3.678e-38	3.678e-38	0.36113	3.678e-38	3.678e-38	3.678e-38	0.74853	3.678e-38	0.940439
11	338.AVG_Signal	8263	8106	5146	6374	55	50	48	4618	277	67	26969	25270	27596	10641	83	49	145	75	129	87	73	62	60	47	3172	59	106	77	48	59	74	46	67	71	53	51	30288	16947	28456	16731	10641	69	733	22940	25961	54	8050	45
12	338.Detection Pval	3.678e-38	3.678e-38	3.678e-38	3.678e-38	0.732063	0.823451	0.853694	3.678e-38	3.678e-38	0.450732	3.678e-38	3.678e-38	3.678e-38	3.678e-38	0.132572	0.839036	3.66868e-07	0.267937	3.71776e-05	0.0866085	0.310211	0.573667	0.621541	0.867428	3.678e-38	0.644844	0.00557187	0.228778	0.853694	0.644844	0.28871	0.880247	0.450732	0.355156	0.771222	0.806944	3.678e-38	3.678e-38	3.678e-38	3.678e-38	3.678e-38	0.402212	3.678e-38	3.678e-38	3.678e-38	0.752055	3.678e-38	0.892165
13	343.AVG_Signal	8108	7719	4827	6131	62	55	220	2310	172	70	26373	25139	27912	12316	81	53	158	74	143	82	85	64	63	51	453	63	87	82	533	66	81	49	68	85	60	56	27170	10622	24493	6828	12316	88	2214	25725	22485	59	19440	48
14	343.Detection Pval	3.678e-38	3.678e-38	3.678e-38	3.678e-38	0.715927	0.865614	6.22349e-31	3.678e-38	2.30932e-15	0.483739	3.678e-38	3.678e-38	3.678e-38	3.678e-38	0.188981	0.895945	6.57241e-12	0.364466	9.50753e-09	0.169006	0.117528	0.661988	0.689467	0.920976	3.678e-38	0.689467	0.0900703	0.169006	3.678e-38	0.604498	0.188981	0.941157	0.544635	0.117528	0.765367	0.848366	3.678e-38	3.678e-38	3.678e-38	3.678e-38	3.678e-38	0.0782756	3.678e-38	3.678e-38	3.678e-38	0.788178	3.678e-38	0.949602
15	346.AVG_Signal	7955	7666	5051	5961	71	58	175	2529	1563	681	25515	23880	26478	15461	89	64	271	74	2493	85	76	162	68	59	58	66	110	90	256	74	91	59	71	86	68	60	24772	5958	22800	3632	15461	1287	3311	26079	20677	68	17954	52
16	346.Detection Pval	3.678e-38	3.678e-38	3.678e-38	3.678e-38	0.598293	0.867734	1.1564e-11	3.678e-38	3.678e-38	3.678e-38	3.678e-38	3.678e-38	3.678e-38	3.678e-38	0.170733	0.762905	3.678e-38	0.519499	3.678e-38	0.246811	0.466346	2.97358e-09	0.673272	0.852926	0.867734	0.719825	0.00934869	0.154351	6.42079e-34	0.519499	0.139043	0.852926	0.598293	0.226255	0.673272	0.837046	3.678e-38	3.678e-38	3.678e-38	3.678e-38	3.678e-38	3.678e-38	3.678e-38	3.678e-38	3.678e-38	0.673272	3.678e-38	0.935217
17	437.AVG_Signal	7672	7352	4705	5670	67	59	182	2277	161	77	23446	22397	24825	15264	264	69	152	75	281	156	79	69	69	54	211	65	85	86	80	85	89	58	75	84	64	85	23087	3646	20898	1871	15264	1680	2816	25706	16063	69	14027	101
18	437.Detection Pval	3.678e-38	3.678e-38	3.678e-38	3.678e-38	0.765787	0.924811	8.26956e-22	3.678e-38	9.78701e-15	0.43392	3.678e-38	3.678e-38	3.678e-38	3.678e-38	3.678e-38	0.707726	3.65721e-12	0.504742	3.678e-38	2.84254e-13	0.365163	0.707726	0.707726	0.970212	4.72105e-34	0.816825	0.189549	0.166347	0.332204	0.189549	0.108204	0.936662	0.504742	0.214643	0.839517	0.189549	3.678e-38	3.678e-38	3.678e-38	3.678e-38	3.678e-38	3.678e-38	3.678e-38	3.678e-38	3.678e-38	0.707726	3.678e-38	0.010559
19	438.AVG_Signal	7699	6965	4586	5742	145	67	484	3271	10254	6234	24744	23672	24369	4955	203	2297	137	147	11937	95	82	70	68	56	292	66	2445	83	478	456	82	58	80	82	365	230	24638	8424	23434	8023	4955	127	2332	18159	19679	117	6838	58
20	438.Detection Pval	3.678e-38	3.678e-38	3.678e-38	3.678e-38	2.38284e-09	0.740179	3.678e-38	3.678e-38	3.678e-38	3.678e-38	3.678e-38	3.678e-38	3.678e-38	3.678e-38	5.88231e-27	3.678e-38	1.05875e-07	8.62655e-10	3.678e-38	0.0455822	0.27225	0.653178	0.712455	0.94068	3.678e-38	0.766456	3.678e-38	0.245301	3.678e-38	3.678e-38	0.27225	0.918319	0.330198	0.27225	3.678e-38	3.678e-38	3.678e-38	3.678e-38	3.678e-38	3.678e-38	3.678e-38	6.63463e-06	3.678e-38	3.678e-38	3.678e-38	0.000213787	3.678e-38	0.918319
21	448.AVG_Signal	7748	7185	4439	5747	343	69	241	3326	173	86	22914	21559	24499	17091	103	68	173	84	223	90	89	81	79	62	105	76	92	101	112	87	104	65	82	90	79	69	23114	3523	20952	2126	17091	2856	4862	25461	16533	81	17177	76
22	448.Detection Pval	3.678e-38	3.678e-38	3.678e-38	3.678e-38	3.678e-38	0.885813	3.77219e-28	3.678e-38	4.16587e-10	0.501657	3.678e-38	3.678e-38	3.678e-38	3.678e-38	0.115799	0.898876	4.16587e-10	0.557794	2.06431e-22	0.390393	0.417738	0.639534	0.690912	0.955326	0.0905337	0.761233	0.337419	0.145706	0.0334935	0.473506	0.102602	0.931494	0.612791	0.390393	0.690912	0.885813	3.678e-38	3.678e-38	3.678e-38	3.678e-38	3.678e-38	3.678e-38	3.678e-38	3.678e-38	3.678e-38	0.639534	3.678e-38	0.761233
23	449.AVG_Signal	7572	7156	4410	5689	122	187	352	3323	172	87	22440	21199	24132	16750	117	71	163	89	449	89	84	81	87	60	163	76	91	105	150	94	102	68	86	94	76	73	22665	3273	19933	2791	16750	2301	4877	25292	15383	85	14048	555
24	449.Detection Pval	3.678e-38	3.678e-38	3.678e-38	3.678e-38	0.00117714	5.29355e-17	3.678e-38	3.678e-38	6.94848e-13	0.416711	3.678e-38	3.678e-38	3.678e-38	3.678e-38	0.00418179	0.860803	1.02664e-10	0.354911	3.678e-38	0.354911	0.512906	0.608352	0.416711	0.975794	1.02664e-10	0.751583	0.296713	0.0478223	5.6017e-08	0.218712	0.0772706	0.90768	0.448511	0.218712	0.751583	0.821775	3.678e-38	3.678e-38	3.678e-38	3.678e-38	3.678e-38	3.678e-38	3.678e-38	3.678e-38	3.678e-38	0.480645	3.678e-38	3.678e-38
[truncated: 2 more columns]
